# Supplementary material for: US Population Data for 94 Identity-Informative SNP Loci
Source: MDPI journal article supplement (doi:10.3390/genes14051071), 2023-05-12
Supplement: s1 [file s1]

A

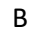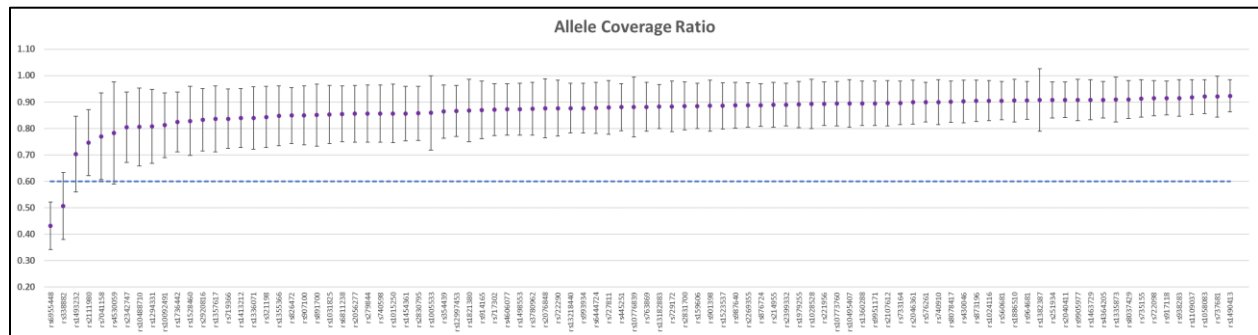

Figure S2: Forensic parameters (Genetic Diversity (GD), Polymorphism Information Content (PIC), Random Match Probability (PM), Power of Discrimination (PD), Observed Heterozygosity (Hobs), Power of Exclusion (PE), and Typical Paternity Index (TPI)) shown in boxplot format for each of four populations studied ((A)African American, (B) Asian American, (C) Caucasian, and (D) Hispanic). In each plot the box extends from the 25<sup>th</sup> (Q1) to the 75<sup>th</sup> (Q3) percentiles, with a line drawn at the mean value. The whiskers are drawn according to the method described by J.W. Tukey [1,2].

A

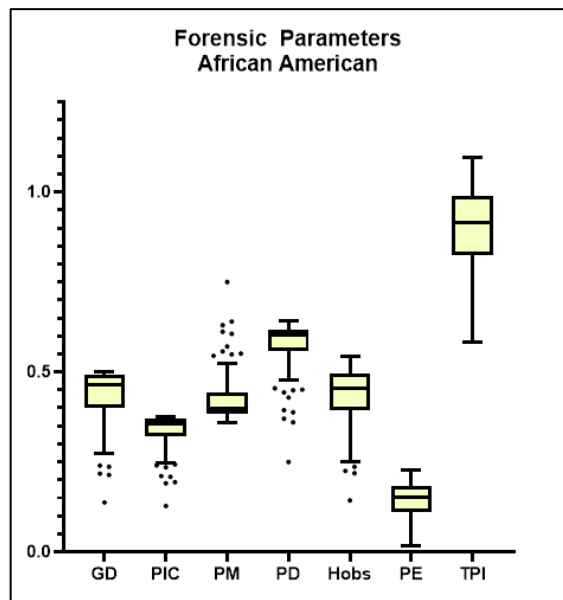

B

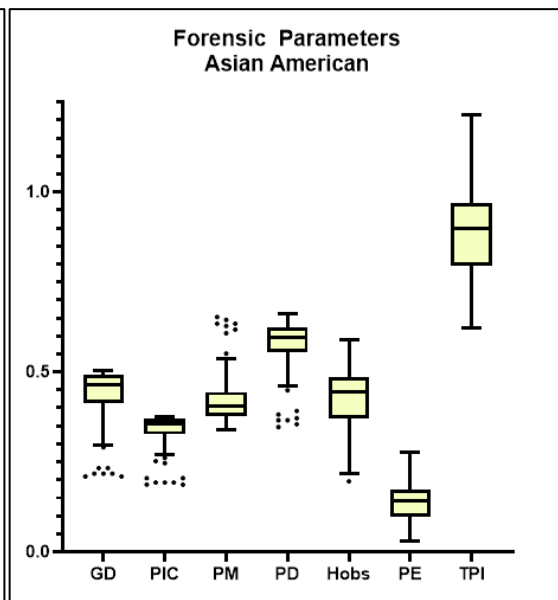

C

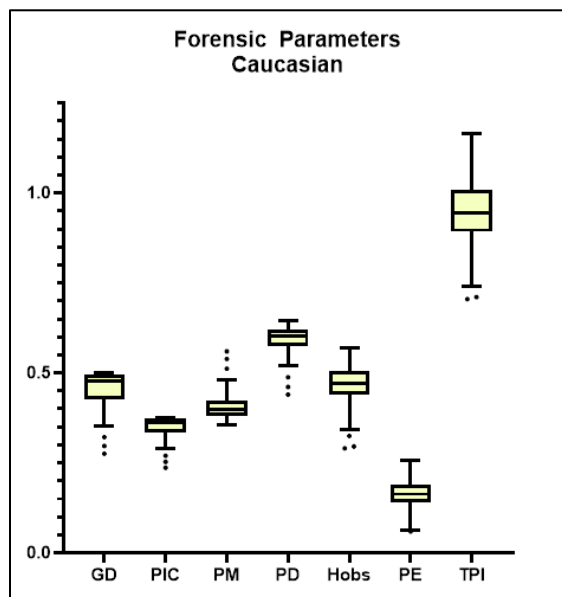

D

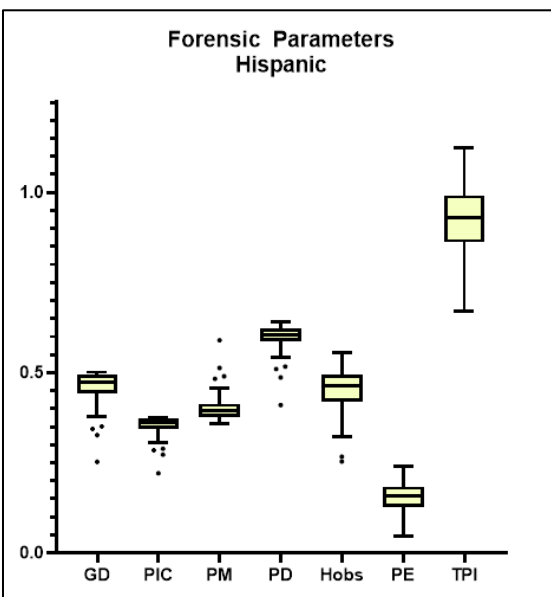

References:

1. Tukey, J.W. (1977). Exploratory data analysis. Reading, MA: Addison-Wesley.
2. McGill, R., Tukey, J. W. and Larsen, W. A. (1978) Variations of box plots. The American Statistician 32, 12-16.
