# Supplementary material for: US Population Data for 94 Identity-Informative SNP Loci
Source: Genes (Basel). 2023 May 12;14(5):1071. doi: 10.3390/genes14051071 (PMC10217833; doi:10.3390/genes14051071)
Supplement: Supplementary file 1 [file genes-14-01071-s001.zip]

Archive with 9 entries (9 files):
- Figure S1 A.png
- Figure S1 B.png
- Supplemental Figures and Captions.pdf
- Table S1 Allele Frequencies.xlsx
- Table S2 Forensic Parameters.xlsx
- Table S3 Linkage Disequilibrium.xlsx
- Table S4 Hardy-Weinberg Equilibrium.xlsx
- Table S5 Microhaplotype Frequencies.xlsx
- Table S6 Novel Microhaplotypes.xlsx
