# Supplementary material for: US Population Data for 94 Identity-Informative SNP Loci
Source: Genes (Basel). 2023 May 12;14(5):1071. doi: 10.3390/genes14051071 (PMC10217833; doi:10.3390/genes14051071)
Supplement: Supplementary file 1 [file genes-14-01071-s001.zip › Table S1 Allele Frequencies.xlsx]

## Sheet: Description
DOI 10.18434/t4/1500024
Supplementary Table S1 to: Kiesler et al., U.S. population data for 94 identity informative SNP loci. Genes (2023)
Description: Frequency values for 94 identity informative SNPs in the ForenSeq Signature Prep Kit. Calculations were performed on 1036 samples from major U.S. population segments, each individual's ancestry was self-identified. Frequency values are presented on separate tabs for each population included in the study: All populations (aggregate of all samples, n = 1036), African American (n = 342)…

## Sheet: All populations
Supplementary Table S1 to: Kiesler et al., U.S. population data for 94 identity informative SNP loci. Genes (2023)
	GRCH38 Strand	UAS Allele
SNP ID		A	T	C	G	N*
rs1005533	+	0.490338			0.509662	2070
rs10092491	-		0.426158	0.573842		2072
rs1015250	+			0.382609	0.617391	2070
rs1024116	-	0.421815			0.578185	2072
rs1028528	+	0.58832			0.41168	2072
rs1031825	+	0.389618		0.610382		1676
rs10488710	-			0.618932	0.381068	2060
rs10495407	+	0.269788			0.730212	2072
rs1058083	+	0.40251			0.59749	2072
rs10773760	+	0.630309			0.369691	2072
rs10776839	+		0.407819		0.592181	2072
rs1109037	+	0.470077			0.529923	2072
rs1294331	-	0.396318			0.603682	2064
rs12997453	+	0.397683			0.602317	2072
rs13182883	+	0.409266			0.590734	2072
rs13218440	+	0.383205			0.616795	2072
rs1335873	-	0.458012	0.541988			2072
rs1336071	-	0.436047			0.563953	2064
rs1355366	-	0.566569			0.433431	2058
rs1357617	-	0.762852	0.237148			2062
rs1360288	+		0.289575	0.710425		2072
rs1382387	-		0.610521		0.389479	2072
rs1413212	-	0.333494			0.666506	2072
rs1454361	-	0.587838	0.412162			2072
rs1463729	-	0.628378			0.371622	2072
rs1490413	+	0.453668			0.546332	2072
rs1493232	+	0.580676		0.419324		2070
rs1498553	+		0.522683	0.477317		2072
rs1523537	+		0.589286	0.410714		2072
rs1528460	+		0.498549	0.501451		2068
rs159606	+	0.339286			0.660714	2072
rs1736442	-	0.329775			0.670225	1686
rs1821380	-			0.40251	0.59749	2072
rs1886510	-		0.343629	0.656371		2072
rs1979255	-			0.643822	0.356178	2072
rs2040411	+	0.666988			0.333012	2072
rs2046361	-	0.605695	0.394305			2072
rs2056277	+		0.187741	0.812259		2072
rs2076848	-	0.332529	0.667471			2072
rs2107612	+	0.703668			0.296332	2072
rs2111980	-	0.559846			0.440154	2072
rs214955	-	0.497104			0.502896	2072
rs221956	+		0.334459	0.665541		2072
rs2269355	+			0.528475	0.471525	2072
rs2342747	+	0.341063			0.658937	2070
rs2399332	-	0.374517		0.625483		2072
rs251934	-		0.68195	0.31805		2072
rs279844	+	0.513043	0.486957			2070
rs2830795	+	0.758687			0.241313	2072
rs2831700	+	0.605212			0.394788	2072
rs2920816	-		0.616425	0.383575		2070
rs321198	+		0.421435	0.578565		2062
rs338882	-		0.504831	0.495169		2070
rs354439	-	0.468385	0.531615			2056
rs3780962	-		0.498551	0.501449		2070
rs430046	+		0.375	0.625		2072
rs4364205	+		0.437259		0.562741	2072
rs445251	-			0.400097	0.599903	2072
rs4530059	+	0.349903			0.650097	2072
rs4606077	+		0.311776	0.688224		2072
rs560681	+	0.690637			0.309363	2072
rs576261	+	0.544402		0.455598		2072
rs6444724	+		0.534749	0.465251		2072
rs6811238	+		0.466699		0.533301	2072
rs6955448	+		0.312741	0.687259		2072
rs7041158	+		0.361702	0.638298		1974
rs717302	+	0.54778			0.45222	2072
rs719366	-		0.730359	0.269641		2062
rs722098	+	0.554054			0.445946	2072
rs722290	-			0.497104	0.502896	2072
rs727811	-	0.452703		0.547297		2072
rs729172	-	0.310328		0.689672		2072
rs733164	+	0.290541			0.709459	2072
rs735155	-	0.449324			0.550676	2072
rs737681	+		0.385618	0.614382		2072
rs740598	+	0.632722			0.367278	2072
rs740910	+	0.784749			0.215251	2072
rs763869	-		0.532336	0.467664		2072
rs8037429	+		0.460907	0.539093		2072
rs8078417	+		0.302124	0.697876		2072
rs826472	+		0.275579	0.724421		2072
rs873196	+		0.695463	0.304537		2072
rs876724	+		0.263996	0.736004		2072
rs891700	+	0.476834			0.523166	2072
rs901398	+		0.648166	0.351834		2072
rs907100	+			0.564189	0.435811	2072
rs914165	+	0.543961			0.456039	2070
rs917118	+		0.423263	0.576737		2072
rs938283	+		0.851834	0.148166		2072
rs964681	+		0.645753	0.354247		2072
rs987640	+	0.467664	0.532336			2072
rs9905977	+	0.294402			0.705598	2072
rs993934	-		0.641892	0.358108		2072
rs9951171	+	0.438224			0.561776	2072
	Average	0.48982	0.474298	0.527044	0.508315
	Minimum	0.269788	0.187741	0.148166	0.215251
	Maximum	0.784749	0.851834	0.812259	0.730212
	Overall Average	0.5		Overall SD	0.137863
*Note: 2072 is the maximum number of alleles sampled per locus. For some loci the sample size is lower where genotypes did not meet minimum allele calling thresholds.

## Sheet: African American
Supplementary Table S1 to: Kiesler et al., U.S. population data for 94 identity informative SNP loci. Genes (2023)
	GRCH38 Strand	Allele
SNP ID		A	T	C	G	N
rs1005533	+	0.546921			0.453079	682
rs10092491	-		0.425439	0.574561		684
rs1015250	+			0.635965	0.364035	684
rs1024116	-	0.350877			0.649123	684
rs1028528	+	0.295322			0.704678	684
rs1031825	+	0.542105		0.457895		570
rs10488710	-			0.570588	0.429412	680
rs10495407	+	0.124269			0.875731	684
rs1058083	+	0.412281			0.587719	684
rs10773760	+	0.709064			0.290936	684
rs10776839	+		0.359649		0.640351	684
rs1109037	+	0.447368			0.552632	684
rs1294331	-	0.419355			0.580645	682
rs12997453	+	0.380117			0.619883	684
rs13182883	+	0.48538			0.51462	684
rs13218440	+	0.384503			0.615497	684
rs1335873	-	0.790936	0.209064			684
rs1336071	-	0.406433			0.593567	684
rs1355366	-	0.43695			0.56305	682
rs1357617	-	0.758065	0.241935			682
rs1360288	+		0.239766	0.760234		684
rs1382387	-		0.409357		0.590643	684
rs1413212	-	0.380117			0.619883	684
rs1454361	-	0.69152	0.30848			684
rs1463729	-	0.748538			0.251462	684
rs1490413	+	0.428363			0.571637	684
rs1493232	+	0.546921		0.453079		682
rs1498553	+		0.54386	0.45614		684
rs1523537	+		0.573099	0.426901		684
rs1528460	+		0.162757	0.837243		682
rs159606	+	0.334795			0.665205	684
rs1736442	-	0.297535			0.702465	568
rs1821380	-			0.374269	0.625731	684
rs1886510	-		0.171053	0.828947		684
rs1979255	-			0.675439	0.324561	684
rs2040411	+	0.76462			0.23538	684
rs2046361	-	0.459064	0.540936			684
rs2056277	+		0.137427	0.862573		684
rs2076848	-	0.21345	0.78655			684
rs2107612	+	0.635965			0.364035	684
rs2111980	-	0.676901			0.323099	684
rs214955	-	0.535088			0.464912	684
rs221956	+		0.352339	0.647661		684
rs2269355	+			0.504386	0.495614	684
rs2342747	+	0.359649			0.640351	684
rs2399332	-	0.435673		0.564327		684
rs251934	-		0.758772	0.241228		684
rs279844	+	0.505848	0.494152			684
rs2830795	+	0.861111			0.138889	684
rs2831700	+	0.668129			0.331871	684
rs2920816	-		0.633041	0.366959		684
rs321198	+		0.432551	0.567449		682
rs338882	-		0.519062	0.480938		682
rs354439	-	0.627941	0.372059			680
rs3780962	-		0.494152	0.505848		684
rs430046	+		0.314327	0.685673		684
rs4364205	+		0.431287		0.568713	684
rs445251	-			0.422515	0.577485	684
rs4530059	+	0.328947			0.671053	684
rs4606077	+		0.429825	0.570175		684
rs560681	+	0.695906			0.304094	684
rs576261	+	0.559942		0.440058		684
rs6444724	+		0.464912	0.535088		684
rs6811238	+		0.44152		0.55848	684
rs6955448	+		0.326023	0.673977		684
rs7041158	+		0.364048	0.635952		662
rs717302	+	0.451754			0.548246	684
rs719366	-		0.823529	0.176471		680
rs722098	+	0.270468			0.729532	684
rs722290	-			0.542398	0.457602	684
rs727811	-	0.27924		0.72076		684
rs729172	-	0.19152		0.80848		684
rs733164	+	0.337719			0.662281	684
rs735155	-	0.302632			0.697368	684
rs737681	+		0.489766	0.510234		684
rs740598	+	0.595029			0.404971	684
rs740910	+	0.925439			0.0745614	684
rs763869	-		0.480994	0.519006		684
rs8037429	+		0.407895	0.592105		684
rs8078417	+		0.358187	0.641813		684
rs826472	+		0.175439	0.824561		684
rs873196	+		0.754386	0.245614		684
rs876724	+		0.168129	0.831871		684
rs891700	+	0.504386			0.495614	684
rs901398	+		0.624269	0.375731		684
rs907100	+			0.773392	0.226608	684
rs914165	+	0.756598			0.243402	682
rs917118	+		0.650585	0.349415		684
rs938283	+		0.878655	0.121345		684
rs964681	+		0.722222	0.277778		684
rs987640	+	0.451754	0.548246			684
rs9905977	+	0.245614			0.754386	684
rs993934	-		0.678363	0.321637		684
rs9951171	+	0.467836			0.532164	684
	avg	0.490705	0.458095	0.541971	0.507903
	min	0.124269	0.137427	0.121345	0.0745614
	max	0.925439	0.878655	0.862573	0.875731
*Note: 684 is the maximum number of alleles sampled per locus. For some loci the sample size is lower where genotypes did not meet minimum allele calling thresholds.

## Sheet: Asian American
Supplementary Table S1 to: Kiesler et al., U.S. population data for 94 identity informative SNP loci. Genes (2023)
	GRCH38 Strand	Allele
SNP ID		A	T	C	G	N
rs1005533	+	0.340206			0.659794	194
rs10092491	-		0.396907	0.603093		194
rs1015250	+			0.479381	0.520619	194
rs1024116	-	0.118557			0.881443	194
rs1028528	+	0.670103			0.329897	194
rs1031825	+	0.424051		0.575949		158
rs10488710	-			0.649485	0.350515	194
rs10495407	+	0.28866			0.71134	194
rs1058083	+	0.443299			0.556701	194
rs10773760	+	0.695876			0.304124	194
rs10776839	+		0.402062		0.597938	194
rs1109037	+	0.391753			0.608247	194
rs1294331	-	0.335052			0.664948	194
rs12997453	+	0.350515			0.649485	194
rs13182883	+	0.371134			0.628866	194
rs13218440	+	0.360825			0.639175	194
rs1335873	-	0.309278	0.690722			194
rs1336071	-	0.381443			0.618557	194
rs1355366	-	0.793814			0.206186	194
rs1357617	-	0.824742	0.175258			194
rs1360288	+		0.386598	0.613402		194
rs1382387	-		0.680412		0.319588	194
rs1413212	-	0.525773			0.474227	194
rs1454361	-	0.505155	0.494845			194
rs1463729	-	0.396907			0.603093	194
rs1490413	+	0.42268			0.57732	194
rs1493232	+	0.391753		0.608247		194
rs1498553	+		0.515464	0.484536		194
rs1523537	+		0.57732	0.42268		194
rs1528460	+		0.64433	0.35567		194
rs159606	+	0.345361			0.654639	194
rs1736442	-	0.290323			0.709677	186
rs1821380	-			0.376289	0.623711	194
rs1886510	-		0.190722	0.809278		194
rs1979255	-			0.628866	0.371134	194
rs2040411	+	0.365979			0.634021	194
rs2046361	-	0.603093	0.396907			194
rs2056277	+		0.123711	0.876289		194
rs2076848	-	0.376289	0.623711			194
rs2107612	+	0.876289			0.123711	194
rs2111980	-	0.654639			0.345361	194
rs214955	-	0.608247			0.391753	194
rs221956	+		0.340206	0.659794		194
rs2269355	+			0.43299	0.56701	194
rs2342747	+	0.314433			0.685567	194
rs2399332	-	0.298969		0.701031		194
rs251934	-		0.78866	0.21134		194
rs279844	+	0.474227	0.525773			194
rs2830795	+	0.520619			0.479381	194
rs2831700	+	0.551546			0.448454	194
rs2920816	-		0.649485	0.350515		194
rs321198	+		0.438144	0.561856		194
rs338882	-		0.572165	0.427835		194
rs354439	-	0.448454	0.551546			194
rs3780962	-		0.494845	0.505155		194
rs430046	+		0.412371	0.587629		194
rs4364205	+		0.448454		0.551546	194
rs445251	-			0.319588	0.680412	194
rs4530059	+	0.304124			0.695876	194
rs4606077	+		0.278351	0.721649		194
rs560681	+	0.582474			0.417526	194
rs576261	+	0.613402		0.386598		194
rs6444724	+		0.603093	0.396907		194
rs6811238	+		0.458763		0.541237	194
rs6955448	+		0.268041	0.731959		194
rs7041158	+		0.290323	0.709677		186
rs717302	+	0.865979			0.134021	194
rs719366	-		0.762887	0.237113		194
rs722098	+	0.458763			0.541237	194
rs722290	-			0.43299	0.56701	194
rs727811	-	0.71134		0.28866		194
rs729172	-	0.118557		0.881443		194
rs733164	+	0.134021			0.865979	194
rs735155	-	0.773196			0.226804	194
rs737681	+		0.221649	0.778351		194
rs740598	+	0.71134			0.28866	194
rs740910	+	0.876289			0.123711	194
rs763869	-		0.71134	0.28866		194
rs8037429	+		0.489691	0.510309		194
rs8078417	+		0.242268	0.757732		194
rs826472	+		0.201031	0.798969		194
rs873196	+		0.793814	0.206186		194
rs876724	+		0.458763	0.541237		194
rs891700	+	0.530928			0.469072	194
rs901398	+		0.613402	0.386598		194
rs907100	+			0.546392	0.453608	194
rs914165	+	0.319588			0.680412	194
rs917118	+		0.309278	0.690722		194
rs938283	+		0.819588	0.180412		194
rs964681	+		0.690722	0.309278		194
rs987640	+	0.536082	0.463918			194
rs9905977	+	0.391753			0.608247	194
rs993934	-		0.592784	0.407216		194
rs9951171	+	0.381443			0.618557	194
	avg	0.478026	0.483496	0.520666	0.518375
	min	0.118557	0.123711	0.180412	0.123711
	max	0.876289	0.819588	0.881443	0.881443
*Note: 194 is the maximum number of alleles sampled per locus. For some loci the sample size is lower where genotypes did not meet minimum allele calling thresholds.

## Sheet: Caucasian
Supplementary Table S1 to: Kiesler et al., U.S. population data for 94 identity informative SNP loci. Genes (2023)
	GRCH38 Strand	Allele
SNP ID		A	T	C	G	N
rs1005533	+	0.520776			0.479224	722
rs10092491	-		0.451524	0.548476		722
rs1015250	+			0.201389	0.798611	720
rs1024116	-	0.522161			0.477839	722
rs1028528	+	0.739612			0.260388	722
rs1031825	+	0.282456		0.717544		570
rs10488710	-			0.656425	0.343575	716
rs10495407	+	0.358726			0.641274	722
rs1058083	+	0.350416			0.649584	722
rs10773760	+	0.562327			0.437673	722
rs10776839	+		0.430748		0.569252	722
rs1109037	+	0.515235			0.484765	722
rs1294331	-	0.382682			0.617318	716
rs12997453	+	0.430748			0.569252	722
rs13182883	+	0.368421			0.631579	722
rs13218440	+	0.378116			0.621884	722
rs1335873	-	0.239612	0.760388			722
rs1336071	-	0.439776			0.560224	714
rs1355366	-	0.543662			0.456338	710
rs1357617	-	0.739496	0.260504			714
rs1360288	+		0.32687	0.67313		722
rs1382387	-		0.711911		0.288089	722
rs1413212	-	0.259003			0.740997	722
rs1454361	-	0.538781	0.461219			722
rs1463729	-	0.610803			0.389197	722
rs1490413	+	0.461219			0.538781	722
rs1493232	+	0.649584		0.350416		722
rs1498553	+		0.515235	0.484765		722
rs1523537	+		0.573407	0.426593		722
rs1528460	+		0.689751	0.310249		722
rs159606	+	0.306094			0.693906	722
rs1736442	-	0.377698			0.622302	556
rs1821380	-			0.416898	0.583102	722
rs1886510	-		0.51108	0.48892		722
rs1979255	-			0.663435	0.336565	722
rs2040411	+	0.648199			0.351801	722
rs2046361	-	0.699446	0.300554			722
rs2056277	+		0.240997	0.759003		722
rs2076848	-	0.429363	0.570637			722
rs2107612	+	0.707756			0.292244	722
rs2111980	-	0.458449			0.541551	722
rs214955	-	0.457064			0.542936	722
rs221956	+		0.300554	0.699446		722
rs2269355	+			0.562327	0.437673	722
rs2342747	+	0.301389			0.698611	720
rs2399332	-	0.336565		0.663435		722
rs251934	-		0.590028	0.409972		722
rs279844	+	0.538889	0.461111			720
rs2830795	+	0.716066			0.283934	722
rs2831700	+	0.595568			0.404432	722
rs2920816	-		0.563712	0.436288		722
rs321198	+		0.399441	0.600559		716
rs338882	-		0.504155	0.495845		722
rs354439	-	0.391061	0.608939			716
rs3780962	-		0.465278	0.534722		720
rs430046	+		0.421053	0.578947		722
rs4364205	+		0.447368		0.552632	722
rs445251	-			0.390582	0.609418	722
rs4530059	+	0.379501			0.620499	722
rs4606077	+		0.228532	0.771468		722
rs560681	+	0.682825			0.317175	722
rs576261	+	0.529086		0.470914		722
rs6444724	+		0.609418	0.390582		722
rs6811238	+		0.455679		0.544321	722
rs6955448	+		0.331025	0.668975		722
rs7041158	+		0.353116	0.646884		674
rs717302	+	0.490305			0.509695	722
rs719366	-		0.631285	0.368715		716
rs722098	+	0.81856			0.18144	722
rs722290	-			0.495845	0.504155	722
rs727811	-	0.540166		0.459834		722
rs729172	-	0.445983		0.554017		722
rs733164	+	0.256233			0.743767	722
rs735155	-	0.470914			0.529086	722
rs737681	+		0.386427	0.613573		722
rs740598	+	0.65374			0.34626	722
rs740910	+	0.711911			0.288089	722
rs763869	-		0.479224	0.520776		722
rs8037429	+		0.48338	0.51662		722
rs8078417	+		0.239612	0.760388		722
rs826472	+		0.401662	0.598338		722
rs873196	+		0.603878	0.396122		722
rs876724	+		0.278393	0.721607		722
rs891700	+	0.493075			0.506925	722
rs901398	+		0.685596	0.314404		722
rs907100	+			0.430748	0.569252	722
rs914165	+	0.419668			0.580332	722
rs917118	+		0.265928	0.734072		722
rs938283	+		0.83518	0.16482		722
rs964681	+		0.552632	0.447368		722
rs987640	+	0.481994	0.518006			722
rs9905977	+	0.292244			0.707756	722
rs993934	-		0.620499	0.379501		722
rs9951171	+	0.433518			0.566482	722
	avg	0.489352	0.477347	0.52211	0.510657
	min	0.239612	0.228532	0.16482	0.18144
	max	0.81856	0.83518	0.771468	0.798611
*Note: 722 is the maximum number of alleles sampled per locus. For some loci the sample size is lower where genotypes did not meet minimum allele calling thresholds.

## Sheet: Hispanic
Supplementary Table S1 to: Kiesler et al., U.S. population data for 94 identity informative SNP loci. Genes (2023)
	GRCH38 Strand	Allele
SNP ID		A	T	C	G	N
rs1005533	+	0.423729			0.576271	472
rs10092491	-		0.400424	0.599576		472
rs1015250	+			0.252119	0.747881	472
rs1024116	-	0.495763			0.504237	472
rs1028528	+	0.747881			0.252119	472
rs1031825	+	0.306878		0.693122		378
rs10488710	-			0.619149	0.380851	470
rs10495407	+	0.336864			0.663136	472
rs1058083	+	0.451271			0.548729	472
rs10773760	+	0.59322			0.40678	472
rs10776839	+		0.444915		0.555085	472
rs1109037	+	0.466102			0.533898	472
rs1294331	-	0.408898			0.591102	472
rs12997453	+	0.391949			0.608051	472
rs13182883	+	0.377119			0.622881	472
rs13218440	+	0.398305			0.601695	472
rs1335873	-	0.370763	0.629237			472
rs1336071	-	0.495763			0.504237	472
rs1355366	-	0.694915			0.305085	472
rs1357617	-	0.779661	0.220339			472
rs1360288	+		0.264831	0.735169		472
rs1382387	-		0.71822		0.28178	472
rs1413212	-	0.300847			0.699153	472
rs1454361	-	0.54661	0.45339			472
rs1463729	-	0.576271			0.423729	472
rs1490413	+	0.491525			0.508475	472
rs1493232	+	0.601695		0.398305		472
rs1498553	+		0.506356	0.493644		472
rs1523537	+		0.641949	0.358051		472
rs1528460	+		0.631915	0.368085		470
rs159606	+	0.394068			0.605932	472
rs1736442	-	0.327128			0.672872	376
rs1821380	-			0.432203	0.567797	472
rs1886510	-		0.400424	0.599576		472
rs1979255	-			0.574153	0.425847	472
rs2040411	+	0.677966			0.322034	472
rs2046361	-	0.675847	0.324153			472
rs2056277	+		0.205508	0.794492		472
rs2076848	-	0.338983	0.661017			472
rs2107612	+	0.724576			0.275424	472
rs2111980	-	0.506356			0.493644	472
rs214955	-	0.457627			0.542373	472
rs221956	+		0.358051	0.641949		472
rs2269355	+			0.550847	0.449153	472
rs2342747	+	0.385593			0.614407	472
rs2399332	-	0.375		0.625		472
rs251934	-		0.667373	0.332627		472
rs279844	+	0.5	0.5			472
rs2830795	+	0.773305			0.226695	472
rs2831700	+	0.550847			0.449153	472
rs2920816	-		0.659574	0.340426		470
rs321198	+		0.431915	0.568085		470
rs338882	-		0.457627	0.542373		472
rs354439	-	0.362661	0.637339			466
rs3780962	-		0.557203	0.442797		472
rs430046	+		0.377119	0.622881		472
rs4364205	+		0.425847		0.574153	472
rs445251	-			0.415254	0.584746	472
rs4530059	+	0.353814			0.646186	472
rs4606077	+		0.28178	0.71822		472
rs560681	+	0.739407			0.260593	472
rs576261	+	0.516949		0.483051		472
rs6444724	+		0.493644	0.506356		472
rs6811238	+		0.523305		0.476695	472
rs6955448	+		0.283898	0.716102		472
rs7041158	+		0.400442	0.599558		452
rs717302	+	0.644068			0.355932	472
rs719366	-		0.733051	0.266949		472
rs722098	+	0.599576			0.400424	472
rs722290	-			0.459746	0.540254	472
rs727811	-	0.463983		0.536017		472
rs729172	-	0.353814		0.646186		472
rs733164	+	0.338983			0.661017	472
rs735155	-	0.495763			0.504237	472
rs737681	+		0.300847	0.699153		472
rs740598	+	0.622881			0.377119	472
rs740910	+	0.654661			0.345339	472
rs763869	-		0.614407	0.385593		472
rs8037429	+		0.491525	0.508475		472
rs8078417	+		0.341102	0.658898		472
rs826472	+		0.258475	0.741525		472
rs873196	+		0.709746	0.290254		472
rs876724	+		0.300847	0.699153		472
rs891700	+	0.389831			0.610169	472
rs901398	+		0.639831	0.360169		472
rs907100	+			0.472458	0.527542	472
rs914165	+	0.519068			0.480932	472
rs917118	+		0.381356	0.618644		472
rs938283	+		0.851695	0.148305		472
rs964681	+		0.658898	0.341102		472
rs987640	+	0.440678	0.559322			472
rs9905977	+	0.32839			0.67161	472
rs993934	-		0.641949	0.358051		472
rs9951171	+	0.425847			0.574153	472
	avg	0.493994	0.489322	0.515863	0.501053
	min	0.300847	0.205508	0.148305	0.226695
	max	0.779661	0.851695	0.794492	0.747881
*Note: 472 is the maximum number of alleles sampled per locus. For some loci the sample size is lower where genotypes did not meet minimum allele calling thresholds.
