# Supplementary material for: US Population Data for 94 Identity-Informative SNP Loci
Source: Genes (Basel). 2023 May 12;14(5):1071. doi: 10.3390/genes14051071 (PMC10217833; doi:10.3390/genes14051071)
Supplement: Supplementary file 1 [file genes-14-01071-s001.zip › Table S2 Forensic Parameters.xlsx]

## Sheet: Legend
DOI 10.18434/t4/1500024
Supplementary Table S2 to: Kiesler et al., U.S. population data for 94 identity informative SNP loci. Genes (2023)
Description: Forensic parameters calculated using the online application STRAF v2.1.1 (Gouy, A., & Zieger, M. (2017). STRAF - A convenient online tool for STR data evaluation in forensic genetics. Forensic Science International: Genetics, 30, 148-151.) found at www.straf.fr, accessed January 2023. Forensic parameters are presented on separate tabs for each population included in the study: All po…
Key:
N	Sample Size
Nall	Ploidy
GD	Gene Diversity (also known as Expected Heterozygosity)
PIC	Polymorphism Information Content
PM	Probability of Matching
PD	Power of Discrimination
Hobs	Observed Heterozygosity
PE	Power of Exclusion
TPI	Typical Paternity Index

## Sheet: All populations
Supplementary Table S2 to: Kiesler et al., U.S. population data for 94 identity informative SNP loci. Genes (2023)
Locus	N	Nall	GD	PIC	PM	PD	Hobs	PE	TPI
rs1005533	2070	2	0.500055	0.374907	0.366729	0.633271	0.482126	0.172333	0.965485
rs10092491	2072	2	0.489331	0.369488	0.382595	0.617405	0.493243	0.181656	0.986667
rs1015250	2070	2	0.472667	0.360839	0.367561	0.632439	0.4	0.11392	0.833333
rs1024116	2072	2	0.48801	0.368812	0.374005	0.625995	0.471042	0.163395	0.945255
rs1028528	2072	2	0.484633	0.367078	0.35391	0.64609	0.390927	0.108498	0.820919
rs1031825	1676	2	0.475916	0.362519	0.37565	0.62435	0.442721	0.142105	0.897216
rs10488710	2060	2	0.471939	0.360455	0.386885	0.613115	0.463107	0.157208	0.931284
rs10495407	2072	2	0.394195	0.316385	0.439985	0.560015	0.354247	0.088416	0.77429
rs1058083	2072	2	0.481224	0.365315	0.379215	0.620785	0.467181	0.160363	0.938406
rs10773760	2072	2	0.466264	0.357443	0.386317	0.613683	0.445946	0.14442	0.902439
rs10776839	2072	2	0.483238	0.366358	0.375298	0.624702	0.462355	0.156631	0.929982
rs1109037	2072	2	0.49845	0.374103	0.3712	0.6288	0.488417	0.177565	0.977358
rs1294331	2064	2	0.478732	0.364019	0.386523	0.613477	0.478682	0.169519	0.959108
rs12997453	2072	2	0.479294	0.364312	0.385159	0.614841	0.476834	0.168022	0.95572
rs13182883	2072	2	0.483768	0.366632	0.37366	0.62634	0.459459	0.154423	0.925
rs13218440	2072	2	0.472946	0.360987	0.389061	0.610939	0.471042	0.163395	0.945255
rs1335873	2072	2	0.496714	0.373231	0.340035	0.659965	0.379344	0.101845	0.805599
rs1336071	2064	2	0.492058	0.370876	0.363169	0.636831	0.453488	0.149942	0.914894
rs1355366	2058	2	0.491376	0.370529	0.363629	0.636371	0.452867	0.149482	0.913854
rs1357617	2062	2	0.361994	0.296362	0.472043	0.527957	0.352085	0.0873195	0.771707
rs1360288	2072	2	0.411642	0.3268	0.427735	0.572265	0.395753	0.111359	0.827476
rs1382387	2072	2	0.4758	0.362487	0.377113	0.622887	0.446911	0.145118	0.904014
rs1413212	2072	2	0.444766	0.345739	0.408132	0.591868	0.446911	0.145118	0.904014
rs1454361	2072	2	0.484803	0.367165	0.385744	0.614256	0.490347	0.179193	0.981061
rs1463729	2072	2	0.467263	0.357976	0.385976	0.614024	0.447876	0.145819	0.905594
rs1490413	2072	2	0.495946	0.372844	0.36528	0.63472	0.469112	0.161874	0.941818
rs1493232	2070	2	0.487218	0.368407	0.384473	0.615527	0.492754	0.181238	0.985714
rs1498553	2072	2	0.499212	0.374485	0.383583	0.616417	0.514479	0.200486	1.02982
rs1523537	2072	2	0.48429	0.366901	0.380583	0.619417	0.477799	0.168802	0.957486
rs1528460	2068	2	0.500238	0.374998	0.33519	0.66481	0.368472	0.0958665	0.79173
rs159606	2072	2	0.448558	0.347837	0.406365	0.593635	0.452703	0.14936	0.91358
rs1736442	1686	2	0.442309	0.344344	0.411147	0.588853	0.448399	0.146199	0.906452
rs1821380	2072	2	0.481224	0.365315	0.380788	0.619212	0.471042	0.163395	0.945255
rs1886510	2072	2	0.451314	0.349352	0.392255	0.607745	0.415058	0.123342	0.854785
rs1979255	2072	2	0.458852	0.353459	0.396424	0.603576	0.453668	0.150076	0.915194
rs2040411	2072	2	0.444444	0.34556	0.40622	0.59378	0.440154	0.140282	0.893103
rs2046361	2072	2	0.477888	0.363579	0.380646	0.619354	0.462355	0.156631	0.929982
rs2056277	2072	2	0.305136	0.25848	0.531885	0.468115	0.284749	0.0574591	0.699055
rs2076848	2072	2	0.444121	0.34538	0.406235	0.593765	0.439189	0.139601	0.891566
rs2107612	2072	2	0.41724	0.330078	0.426792	0.573208	0.416988	0.12459	0.857616
rs2111980	2072	2	0.493075	0.371393	0.373929	0.626071	0.482625	0.172745	0.966418
rs214955	2072	2	0.500225	0.374992	0.369427	0.630573	0.488417	0.177565	0.977358
rs221956	2072	2	0.445408	0.346094	0.406838	0.593162	0.444981	0.143724	0.90087
rs2269355	2072	2	0.498619	0.374188	0.371482	0.628518	0.489382	0.178377	0.979206
rs2342747	2070	2	0.449695	0.348463	0.40504	0.59496	0.452174	0.148969	0.912698
rs2399332	2072	2	0.468734	0.358758	0.398257	0.601743	0.482625	0.172745	0.966418
rs251934	2072	2	0.433998	0.339702	0.415149	0.584851	0.435328	0.1369	0.88547
rs279844	2070	2	0.499901	0.37483	0.374619	0.625381	0.498551	0.186235	0.99711
rs2830795	2072	2	0.366339	0.299125	0.467277	0.532723	0.341699	0.0821793	0.759531
rs2831700	2072	2	0.478091	0.363685	0.399092	0.600908	0.503861	0.190901	1.00778
rs2920816	2070	2	0.473119	0.361078	0.388282	0.611718	0.469565	0.16223	0.942623
rs321198	2062	2	0.487892	0.368751	0.387103	0.612897	0.499515	0.187076	0.999031
rs338882	2070	2	0.500195	0.374977	0.372901	0.627099	0.495652	0.183724	0.991379
rs354439	2056	2	0.498243	0.373999	0.363285	0.636715	0.469844	0.16245	0.943119
rs3780962	2070	2	0.500237	0.374998	0.375246	0.624754	0.500483	0.187923	1.00097
rs430046	2072	2	0.468976	0.358887	0.395058	0.604942	0.475869	0.167244	0.953959
rs4364205	2072	2	0.492365	0.371033	0.395261	0.604739	0.523166	0.208587	1.04858
rs445251	2072	2	0.48027	0.36482	0.385443	0.614557	0.47973	0.170371	0.961039
rs4530059	2072	2	0.455162	0.351456	0.407237	0.592763	0.472008	0.16416	0.946984
rs4606077	2072	2	0.429351	0.337061	0.416191	0.583809	0.42278	0.128386	0.866221
rs560681	2072	2	0.427521	0.336016	0.414449	0.585551	0.408301	0.119048	0.845024
rs576261	2072	2	0.496297	0.373021	0.387023	0.612977	0.515444	0.201375	1.03187
rs6444724	2072	2	0.497825	0.37379	0.370051	0.629949	0.484556	0.174341	0.970037
rs6811238	2072	2	0.498022	0.373889	0.366857	0.633143	0.477799	0.168802	0.957486
rs6955448	2072	2	0.430076	0.337475	0.421841	0.578159	0.444015	0.143031	0.899306
rs7041158	1974	2	0.461981	0.355142	0.39801	0.60199	0.466059	0.159489	0.936433
rs717302	2072	2	0.495673	0.372707	0.360678	0.639322	0.456564	0.152238	0.920071
rs719366	2062	2	0.394061	0.316303	0.44276	0.55724	0.380213	0.102335	0.806729
rs722098	2072	2	0.494395	0.372061	0.341965	0.658035	0.376448	0.100228	0.801858
rs722290	2072	2	0.500225	0.374992	0.363413	0.636587	0.474903	0.166469	0.952206
rs727811	2072	2	0.495765	0.372753	0.37124	0.62876	0.482625	0.172745	0.966418
rs729172	2072	2	0.428256	0.336436	0.411311	0.588689	0.396718	0.111937	0.8288
rs733164	2072	2	0.412453	0.327277	0.42439	0.57561	0.380309	0.102388	0.806854
rs735155	2072	2	0.495103	0.372419	0.357819	0.642181	0.446911	0.145118	0.904014
rs737681	2072	2	0.474062	0.361574	0.382998	0.617002	0.458494	0.153692	0.923351
rs740598	2072	2	0.464994	0.356764	0.39505	0.60495	0.466216	0.159611	0.936709
rs740910	2072	2	0.337999	0.280769	0.496258	0.503742	0.310811	0.0680804	0.72549
rs763869	2072	2	0.498149	0.373952	0.375656	0.624344	0.497104	0.184979	0.994242
rs8037429	2072	2	0.497183	0.373467	0.362113	0.637887	0.464286	0.158116	0.933333
rs8078417	2072	2	0.421893	0.332779	0.419858	0.580142	0.407336	0.118443	0.843648
rs826472	2072	2	0.399463	0.319562	0.438088	0.561912	0.385135	0.105135	0.813187
rs873196	2072	2	0.423793	0.333875	0.424764	0.575236	0.433398	0.135564	0.882453
rs876724	2072	2	0.388792	0.313098	0.44565	0.55435	0.358108	0.0903975	0.778947
rs891700	2072	2	0.499168	0.374463	0.370483	0.629517	0.488417	0.177565	0.977358
rs901398	2072	2	0.456314	0.352083	0.407714	0.592286	0.475869	0.167244	0.953959
rs907100	2072	2	0.491997	0.370846	0.366544	0.633456	0.462355	0.156631	0.929982
rs914165	2070	2	0.496375	0.37306	0.359783	0.640217	0.456039	0.151844	0.919183
rs917118	2072	2	0.488458	0.369042	0.359556	0.640444	0.431467	0.134238	0.879457
rs938283	2072	2	0.252548	0.220566	0.587821	0.412179	0.265444	0.0502769	0.680683
rs964681	2072	2	0.457733	0.352853	0.39685	0.60315	0.451737	0.148647	0.911972
rs987640	2072	2	0.498149	0.373952	0.374713	0.625287	0.495174	0.183312	0.99044
rs9905977	2072	2	0.415659	0.329156	0.429876	0.570124	0.42278	0.128386	0.866221
rs993934	2072	2	0.459955	0.354056	0.394629	0.605371	0.451737	0.148647	0.911972
rs9951171	2072	2	0.492605	0.371155	0.377946	0.622054	0.490347	0.179193	0.981061
	Median		0.462212	0.354271	0.394367	0.605633	0.446928	0.148173	0.910602
	Standard Dev.		0.044747	0.0261915	0.0373499	0.0373499	0.0494309	0.0323131	0.0739165
	Minimum		0.252548	0.220566	0.33519	0.412179	0.265444	0.0502769	0.680683
	Maximum		0.500238	0.374998	0.587821	0.66481	0.523166	0.208587	1.04858
	Range		0.24769	0.154432	0.252631	0.252631	0.257722	0.15831	0.3679
	Q1		0.444686	0.345694	0.371421	0.592644	0.429295	0.132775	0.876148
	Q3		0.495246	0.372491	0.407356	0.628579	0.480329	0.170862	0.96215
	IQR		0.0505597	0.0267969	0.0359351	0.0359351	0.0510333	0.0380868	0.0860028

## Sheet: African American
Supplementary Table S2 to: Kiesler et al., U.S. population data for 94 identity informative SNP loci. Genes (2023)
Locus	N	Nall	GD	PIC	PM	PD	Hobs	PE	TPI
rs1005533	682	2	0.496325	0.372789	0.383149	0.616851	0.507331	0.193996	1.01488
rs10092491	684	2	0.489597	0.369379	0.386119	0.613881	0.5	0.1875	1
rs1015250	684	2	0.463705	0.35583	0.403663	0.596337	0.482456	0.172605	0.966102
rs1024116	684	2	0.456192	0.351773	0.394429	0.605571	0.438596	0.139184	0.890625
rs1028528	684	2	0.416823	0.329597	0.423327	0.576673	0.397661	0.112504	0.830097
rs1031825	570	2	0.497327	0.373221	0.390729	0.609271	0.522807	0.208248	1.04779
rs10488710	680	2	0.490756	0.369968	0.364758	0.635242	0.452941	0.149537	0.913978
rs10495407	684	2	0.217971	0.193966	0.629647	0.370353	0.236842	0.040619	0.655172
rs1058083	684	2	0.48532	0.367187	0.380784	0.619216	0.479532	0.17021	0.960674
rs10773760	684	2	0.413188	0.327471	0.426405	0.573595	0.394737	0.110752	0.826087
rs10776839	684	2	0.461278	0.354526	0.381399	0.618601	0.409357	0.119711	0.846535
rs1109037	684	2	0.495184	0.372215	0.379091	0.620909	0.497076	0.184954	0.994186
rs1294331	682	2	0.487708	0.368412	0.387277	0.612723	0.498534	0.18622	0.997076
rs12997453	684	2	0.471946	0.360215	0.391625	0.608375	0.473684	0.165494	0.95
rs13182883	684	2	0.500304	0.374786	0.358589	0.641411	0.461988	0.15635	0.929348
rs13218440	684	2	0.474014	0.361305	0.383725	0.616275	0.459064	0.154124	0.924324
rs1335873	684	2	0.331197	0.276027	0.502941	0.497059	0.318713	0.0715251	0.733906
rs1336071	684	2	0.483197	0.366092	0.367463	0.632537	0.438596	0.139184	0.890625
rs1355366	682	2	0.492772	0.370993	0.362269	0.637731	0.451613	0.148555	0.911765
rs1357617	682	2	0.367344	0.299532	0.467652	0.532348	0.360704	0.0917465	0.78211
rs1360288	684	2	0.36509	0.298106	0.470059	0.529941	0.362573	0.0927266	0.784404
rs1382387	684	2	0.484276	0.366649	0.412606	0.587394	0.538012	0.22298	1.08228
rs1413212	684	2	0.471946	0.360215	0.399473	0.600527	0.491228	0.179939	0.982759
rs1454361	684	2	0.427264	0.335629	0.428251	0.571749	0.453216	0.149741	0.914439
rs1463729	684	2	0.377009	0.305598	0.459389	0.540611	0.374269	0.0990232	0.799065
rs1490413	684	2	0.490453	0.369815	0.365155	0.634845	0.453216	0.149741	0.914439
rs1493232	682	2	0.496325	0.372789	0.396221	0.603779	0.530792	0.215893	1.06563
rs1498553	684	2	0.496879	0.373069	0.403663	0.596337	0.54386	0.228843	1.09615
rs1523537	684	2	0.490029	0.369599	0.373568	0.626432	0.473684	0.165494	0.95
rs1528460	682	2	0.272934	0.235396	0.5714	0.4286	0.249267	0.044676	0.666016
rs159606	684	2	0.446067	0.346218	0.411631	0.588369	0.459064	0.154124	0.924324
rs1736442	568	2	0.418753	0.330647	0.432429	0.567571	0.440141	0.140272	0.893082
rs1821380	684	2	0.469069	0.358692	0.389778	0.610222	0.461988	0.15635	0.929348
rs1886510	684	2	0.284002	0.243376	0.550785	0.449215	0.307018	0.0664649	0.721519
rs1979255	684	2	0.439085	0.342327	0.411511	0.588489	0.438596	0.139184	0.890625
rs2040411	684	2	0.36048	0.29517	0.474419	0.525581	0.359649	0.0911967	0.780822
rs2046361	684	2	0.497376	0.373319	0.382853	0.617147	0.508772	0.195292	1.01786
rs2056277	684	2	0.237429	0.208978	0.606306	0.393694	0.251462	0.0454145	0.667969
rs2076848	684	2	0.33627	0.279405	0.498016	0.501984	0.315789	0.0702379	0.730769
rs2107612	684	2	0.463705	0.35583	0.394019	0.605981	0.459064	0.154124	0.924324
rs2111980	684	2	0.438053	0.341748	0.408245	0.591755	0.423977	0.129181	0.86802
rs214955	684	2	0.498266	0.373766	0.381964	0.618036	0.508772	0.195292	1.01786
rs221956	684	2	0.457061	0.352245	0.400653	0.599347	0.459064	0.154124	0.924324
rs2269355	684	2	0.500694	0.374981	0.372166	0.627834	0.494152	0.182434	0.988439
rs2342747	684	2	0.461278	0.354526	0.397558	0.602442	0.461988	0.15635	0.929348
rs2399332	684	2	0.492444	0.370828	0.376287	0.623713	0.48538	0.175025	0.971591
rs251934	684	2	0.36661	0.299069	0.468811	0.531189	0.365497	0.094274	0.788018
rs279844	684	2	0.500664	0.374966	0.396242	0.603758	0.538012	0.22298	1.08228
rs2830795	684	2	0.239548	0.21059	0.611692	0.388308	0.225146	0.0369863	0.645283
rs2831700	684	2	0.444115	0.345135	0.409374	0.590626	0.447368	0.14545	0.904762
rs2920816	684	2	0.46528	0.356674	0.407527	0.592473	0.494152	0.182434	0.988439
rs321198	682	2	0.491622	0.370409	0.390958	0.609042	0.513196	0.19931	1.02711
rs338882	682	2	0.500006	0.374636	0.372142	0.627858	0.492669	0.181165	0.985549
rs354439	680	2	0.46795	0.358095	0.388599	0.611401	0.455882	0.151727	0.918919
rs3780962	684	2	0.500664	0.374966	0.382699	0.617301	0.51462	0.200616	1.03012
rs430046	684	2	0.431683	0.338149	0.42384	0.57616	0.453216	0.149741	0.914439
rs4364205	684	2	0.491275	0.370234	0.387418	0.612582	0.505848	0.192668	1.01183
rs445251	684	2	0.488707	0.368924	0.381365	0.618635	0.488304	0.17747	0.977143
rs4530059	684	2	0.442128	0.344029	0.411357	0.588643	0.447368	0.14545	0.904762
rs4606077	684	2	0.490868	0.370027	0.389351	0.610649	0.508772	0.195292	1.01786
rs560681	684	2	0.423861	0.333675	0.423224	0.576776	0.426901	0.131138	0.872449
rs576261	684	2	0.493536	0.371381	0.39142	0.60858	0.517544	0.203318	1.03636
rs6444724	684	2	0.498266	0.373766	0.373192	0.626808	0.491228	0.179939	0.982759
rs6811238	684	2	0.493882	0.371557	0.380391	0.619609	0.497076	0.184954	0.994186
rs6955448	684	2	0.440108	0.3429	0.411426	0.588574	0.44152	0.14125	0.895288
rs7041158	662	2	0.463735	0.355834	0.402725	0.597275	0.480363	0.170888	0.962209
rs717302	684	2	0.49607	0.372662	0.376783	0.623217	0.494152	0.182434	0.988439
rs719366	680	2	0.291086	0.248417	0.548581	0.451419	0.270588	0.0521365	0.685484
rs722098	684	2	0.395208	0.316764	0.439742	0.560258	0.359649	0.0911967	0.780822
rs722290	684	2	0.497132	0.373196	0.384648	0.615352	0.511696	0.197941	1.02395
rs727811	684	2	0.403119	0.321515	0.441589	0.558411	0.418129	0.125331	0.859296
rs729172	684	2	0.310134	0.26173	0.524281	0.475719	0.312865	0.0689656	0.72766
rs733164	684	2	0.447985	0.347278	0.395352	0.604648	0.412281	0.121564	0.850746
rs735155	684	2	0.422709	0.333011	0.418026	0.581974	0.400585	0.114276	0.834146
rs737681	684	2	0.500522	0.374895	0.387726	0.612274	0.523392	0.208801	1.04908
rs740598	684	2	0.482645	0.365806	0.372952	0.627048	0.453216	0.149741	0.914439
rs740910	684	2	0.138206	0.128481	0.749513	0.250487	0.143275	0.0162103	0.583618
rs763869	684	2	0.500009	0.374639	0.391625	0.608375	0.52924	0.214391	1.06211
rs8037429	684	2	0.48374	0.366373	0.381092	0.618908	0.476608	0.16784	0.955307
rs8078417	684	2	0.460451	0.35408	0.399525	0.600475	0.464912	0.1586	0.934426
rs826472	684	2	0.289743	0.247467	0.544834	0.455166	0.309942	0.067708	0.724576
rs873196	684	2	0.371118	0.301912	0.467888	0.532112	0.391813	0.109019	0.822115
rs876724	684	2	0.280132	0.2406	0.557317	0.442683	0.283626	0.0570257	0.697959
rs891700	684	2	0.500694	0.374981	0.361701	0.638299	0.47076	0.163172	0.944751
rs901398	684	2	0.469801	0.35908	0.390188	0.609812	0.464912	0.1586	0.934426
rs907100	684	2	0.351027	0.289084	0.48314	0.51686	0.347953	0.0852494	0.766816
rs914165	682	2	0.368856	0.300487	0.46846	0.53154	0.381232	0.10291	0.808057
rs917118	684	2	0.455314	0.351296	0.396242	0.603758	0.44152	0.14125	0.895288
rs938283	684	2	0.213553	0.190505	0.639599	0.360401	0.219298	0.0352357	0.640449
rs964681	684	2	0.401822	0.32074	0.443641	0.556359	0.421053	0.127245	0.863636
rs987640	684	2	0.49607	0.372662	0.379655	0.620345	0.5	0.1875	1
rs9905977	684	2	0.371118	0.301912	0.467888	0.532112	0.391813	0.109019	0.822115
rs993934	684	2	0.437012	0.341163	0.410092	0.589908	0.426901	0.131138	0.872449
rs9951171	684	2	0.49866	0.373963	0.3847	0.6153	0.51462	0.200616	1.03012
	Median		0.432264	0.335254	0.427064	0.572936	0.433276	0.143503	0.899072
	Standard Dev.		0.0804016	0.0506293	0.0714896	0.0714896	0.0831713	0.0499153	0.116071
	Minimum		0.138206	0.128481	0.358589	0.250487	0.143275	0.0162103	0.583618
	Maximum		0.500694	0.374981	0.749513	0.641411	0.54386	0.228843	1.09615
	Range		0.362487	0.246499	0.390924	0.390924	0.400585	0.212633	0.512536
	Q1		0.400168	0.319746	0.383075	0.557898	0.394006	0.110319	0.825094
	Q3		0.492526	0.370869	0.442102	0.616925	0.494152	0.182434	0.988439
	IQR		0.0923575	0.0511232	0.0590266	0.0590266	0.100146	0.0721153	0.163345

## Sheet: Asian American
Supplementary Table S2 to: Kiesler et al., U.S. population data for 94 identity informative SNP loci. Genes (2023)
Locus	N	Nall	GD	PIC	PM	PD	Hobs	PE	TPI
rs1005533	194	2	0.451258	0.348162	0.384844	0.615156	0.350515	0.0865291	0.769841
rs10092491	194	2	0.481224	0.364146	0.380168	0.619832	0.463918	0.157832	0.932692
rs1015250	194	2	0.501736	0.374575	0.368477	0.631523	0.484536	0.174324	0.97
rs1024116	194	2	0.210085	0.187161	0.644808	0.355192	0.216495	0.0344118	0.638158
rs1028528	194	2	0.444421	0.34439	0.42098	0.57902	0.474227	0.165927	0.95098
rs1031825	158	2	0.491575	0.369165	0.383432	0.616568	0.493671	0.182022	0.9875
rs10488710	194	2	0.457668	0.351656	0.417154	0.582846	0.494845	0.183029	0.989796
rs10495407	194	2	0.412798	0.326345	0.423531	0.576469	0.309278	0.0674248	0.723881
rs1058083	194	2	0.496127	0.371764	0.361462	0.638538	0.453608	0.150031	0.915094
rs10773760	194	2	0.425458	0.333688	0.411202	0.588798	0.360825	0.0918097	0.782258
rs10776839	194	2	0.483308	0.365224	0.357636	0.642364	0.391753	0.108984	0.822034
rs1109037	194	2	0.479034	0.363008	0.386545	0.613455	0.474227	0.165927	0.95098
rs1294331	194	2	0.447893	0.346311	0.413328	0.586672	0.463918	0.157832	0.932692
rs12997453	194	2	0.457668	0.351656	0.439685	0.560315	0.536082	0.22107	1.07778
rs13182883	194	2	0.469206	0.357842	0.375917	0.624083	0.412371	0.121621	0.850877
rs13218440	194	2	0.46365	0.35488	0.401849	0.598151	0.474227	0.165927	0.95098
rs1335873	194	2	0.429464	0.335979	0.415453	0.584547	0.412371	0.121621	0.850877
rs1336071	194	2	0.474334	0.360549	0.376342	0.623658	0.43299	0.135283	0.881818
rs1355366	194	2	0.329042	0.273768	0.50643	0.49357	0.350515	0.0865291	0.769841
rs1357617	194	2	0.290583	0.2473	0.550643	0.449357	0.268041	0.0512109	0.683099
rs1360288	194	2	0.476737	0.361809	0.377192	0.622808	0.443299	0.142518	0.898148
rs1382387	194	2	0.437156	0.340333	0.448188	0.551812	0.515464	0.201393	1.03191
rs1413212	194	2	0.501255	0.374335	0.364438	0.635562	0.474227	0.165927	0.95098
rs1454361	194	2	0.502537	0.374973	0.395047	0.604953	0.536082	0.22107	1.07778
rs1463729	194	2	0.481224	0.364146	0.388883	0.611117	0.484536	0.174324	0.97
rs1490413	194	2	0.490572	0.36895	0.366989	0.633011	0.453608	0.150031	0.915094
rs1493232	194	2	0.479034	0.363008	0.418429	0.581571	0.536082	0.22107	1.07778
rs1498553	194	2	0.50211	0.374761	0.355511	0.644489	0.453608	0.150031	0.915094
rs1523537	194	2	0.490572	0.36895	0.366989	0.633011	0.453608	0.150031	0.915094
rs1528460	194	2	0.460713	0.353301	0.393134	0.606866	0.443299	0.142518	0.898148
rs159606	194	2	0.454516	0.349943	0.399299	0.600701	0.443299	0.142518	0.898148
rs1736442	186	2	0.414298	0.32717	0.43531	0.56469	0.430108	0.13331	0.877358
rs1821380	194	2	0.471823	0.359227	0.389521	0.610479	0.463918	0.157832	0.932692
rs1886510	194	2	0.310293	0.261048	0.526411	0.473589	0.298969	0.0631172	0.713235
rs1979255	194	2	0.469206	0.357842	0.396323	0.603677	0.474227	0.165927	0.95098
rs2040411	194	2	0.466481	0.356393	0.387395	0.612605	0.443299	0.142518	0.898148
rs2046361	194	2	0.481224	0.364146	0.380168	0.619832	0.463918	0.157832	0.932692
rs2056277	194	2	0.217937	0.19331	0.633542	0.366458	0.226804	0.0374905	0.646667
rs2076848	194	2	0.471823	0.359227	0.408226	0.591774	0.505155	0.19205	1.01042
rs2107612	194	2	0.217937	0.19331	0.627591	0.372409	0.247423	0.0440606	0.664384
rs2111980	194	2	0.454516	0.349943	0.406738	0.593262	0.463918	0.157832	0.932692
rs214955	194	2	0.479034	0.363008	0.406526	0.593474	0.515464	0.201393	1.03191
rs221956	194	2	0.451258	0.348162	0.399299	0.600701	0.43299	0.135283	0.881818
rs2269355	194	2	0.493563	0.370469	0.357211	0.642789	0.43299	0.135283	0.881818
rs2342747	194	2	0.433364	0.338193	0.405675	0.594325	0.381443	0.103029	0.808333
rs2399332	194	2	0.421345	0.33132	0.443937	0.556063	0.474227	0.165927	0.95098
rs251934	194	2	0.335078	0.27779	0.500053	0.499947	0.340206	0.0814577	0.757812
rs279844	194	2	0.501255	0.374335	0.364438	0.635562	0.474227	0.165927	0.95098
rs2830795	194	2	0.501736	0.374575	0.352322	0.647678	0.443299	0.142518	0.898148
rs2831700	194	2	0.497249	0.372329	0.372941	0.627059	0.484536	0.174324	0.97
rs2920816	194	2	0.457668	0.351656	0.399724	0.600276	0.453608	0.150031	0.915094
rs321198	194	2	0.494899	0.371145	0.385269	0.614731	0.505155	0.19205	1.01042
rs338882	194	2	0.492121	0.369738	0.399299	0.600701	0.525773	0.211065	1.05435
rs354439	194	2	0.497249	0.372329	0.420555	0.579445	0.56701	0.253148	1.15476
rs3780962	194	2	0.502537	0.374973	0.372516	0.627484	0.494845	0.183029	0.989796
rs430046	194	2	0.487153	0.367203	0.378467	0.621533	0.474227	0.165927	0.95098
rs4364205	194	2	0.497249	0.372329	0.435647	0.564353	0.587629	0.276297	1.2125
rs445251	194	2	0.437156	0.340333	0.460091	0.539909	0.536082	0.22107	1.07778
rs4530059	194	2	0.425458	0.333688	0.454352	0.545648	0.505155	0.19205	1.01042
rs4606077	194	2	0.403825	0.321044	0.446487	0.553513	0.43299	0.135283	0.881818
rs560681	194	2	0.488916	0.368105	0.391221	0.608779	0.505155	0.19205	1.01042
rs576261	194	2	0.476737	0.361809	0.377192	0.622808	0.443299	0.142518	0.898148
rs6444724	194	2	0.481224	0.364146	0.410139	0.589861	0.525773	0.211065	1.05435
rs6811238	194	2	0.499172	0.373294	0.362313	0.637687	0.463918	0.157832	0.932692
rs6955448	194	2	0.394423	0.315405	0.450314	0.549686	0.412371	0.121621	0.850877
rs7041158	186	2	0.414298	0.32717	0.421436	0.578564	0.344086	0.0833422	0.762295
rs717302	194	2	0.233321	0.205179	0.618238	0.381762	0.226804	0.0374905	0.646667
rs719366	194	2	0.363656	0.296338	0.476671	0.523329	0.391753	0.108984	0.822034
rs722098	194	2	0.499172	0.373294	0.404825	0.595175	0.546392	0.231416	1.10227
rs722290	194	2	0.493563	0.370469	0.357211	0.642789	0.43299	0.135283	0.881818
rs727811	194	2	0.412798	0.326345	0.424806	0.575194	0.371134	0.0973072	0.795082
rs729172	194	2	0.210085	0.187161	0.652673	0.347327	0.195876	0.0286485	0.621795
rs733164	194	2	0.233321	0.205179	0.60761	0.39239	0.268041	0.0512109	0.683099
rs735155	194	2	0.352545	0.289223	0.482623	0.517377	0.329897	0.076588	0.746154
rs737681	194	2	0.34683	0.285515	0.491763	0.508237	0.381443	0.103029	0.808333
rs740598	194	2	0.412798	0.326345	0.427782	0.572218	0.391753	0.108984	0.822034
rs740910	194	2	0.217937	0.19331	0.633542	0.366458	0.226804	0.0374905	0.646667
rs763869	194	2	0.412798	0.326345	0.424806	0.575194	0.371134	0.0973072	0.795082
rs8037429	194	2	0.502377	0.374894	0.359124	0.640876	0.463918	0.157832	0.932692
rs8078417	194	2	0.369051	0.299749	0.466468	0.533532	0.319588	0.0719128	0.734848
rs826472	194	2	0.322899	0.269639	0.512382	0.487618	0.319588	0.0719128	0.734848
rs873196	194	2	0.329042	0.273768	0.511106	0.488894	0.391753	0.108984	0.822034
rs876724	194	2	0.499172	0.373294	0.337868	0.662132	0.360825	0.0918097	0.782258
rs891700	194	2	0.500668	0.374042	0.36954	0.63046	0.484536	0.174324	0.97
rs901398	194	2	0.476737	0.361809	0.403337	0.596663	0.505155	0.19205	1.01042
rs907100	194	2	0.498264	0.372839	0.359337	0.640663	0.453608	0.150031	0.915094
rs914165	194	2	0.437156	0.340333	0.400574	0.599426	0.371134	0.0973072	0.795082
rs917118	194	2	0.429464	0.335979	0.406526	0.593474	0.350515	0.0865291	0.769841
rs938283	194	2	0.29726	0.252	0.537677	0.462323	0.340206	0.0814577	0.757812
rs964681	194	2	0.429464	0.335979	0.408226	0.591774	0.371134	0.0973072	0.795082
rs987640	194	2	0.499973	0.373695	0.375066	0.624934	0.494845	0.183029	0.989796
rs9905977	194	2	0.479034	0.363008	0.371665	0.628335	0.43299	0.135283	0.881818
rs993934	194	2	0.485284	0.366243	0.36869	0.63131	0.443299	0.142518	0.898148
rs9951171	194	2	0.474334	0.360549	0.411202	0.588798	0.515464	0.201393	1.03191
	Median		0.433314	0.335008	0.426106	0.573894	0.426407	0.139295	0.889679
	Standard Dev.		0.0798164	0.0500943	0.0730227	0.0730227	0.0850509	0.0530037	0.123204
	Minimum		0.210085	0.187161	0.337868	0.347327	0.195876	0.0286485	0.621795
	Maximum		0.502537	0.374973	0.652673	0.662132	0.587629	0.276297	1.2125
	Range		0.292452	0.187812	0.314805	0.314805	0.391753	0.247649	0.590705
	Q1		0.412798	0.326345	0.376979	0.555426	0.371134	0.0973072	0.795082
	Q3		0.490823	0.369004	0.444574	0.623021	0.484536	0.174324	0.97
	IQR		0.0780243	0.0426585	0.0675949	0.0675949	0.113402	0.0770168	0.174918

## Sheet: Caucasian
Supplementary Table S2 to: Kiesler et al., U.S. population data for 94 identity informative SNP loci. Genes (2023)
Locus	N	Nall	GD	PIC	PM	PD	Hobs	PE	TPI
rs1005533	722	2	0.499829	0.374568	0.377967	0.622033	0.504155	0.191162	1.00838
rs10092491	722	2	0.495987	0.372639	0.381803	0.618197	0.504155	0.191162	1.00838
rs1015250	720	2	0.32211	0.269929	0.511775	0.488225	0.325	0.0743435	0.740741
rs1024116	722	2	0.49971	0.374508	0.388587	0.611413	0.523546	0.208947	1.04942
rs1028528	722	2	0.385706	0.310993	0.452613	0.547387	0.387812	0.10668	0.816742
rs1031825	570	2	0.406062	0.323195	0.431604	0.568396	0.382456	0.103604	0.809659
rs10488710	716	2	0.451694	0.349334	0.39476	0.60524	0.424581	0.129584	0.868932
rs10495407	722	2	0.460721	0.354245	0.388725	0.611275	0.434903	0.136605	0.884804
rs1058083	722	2	0.45588	0.351623	0.395293	0.604707	0.440443	0.140486	0.893564
rs10773760	722	2	0.492913	0.371085	0.384873	0.615127	0.504155	0.191162	1.00838
rs10776839	722	2	0.491088	0.370158	0.38254	0.61746	0.495845	0.18389	0.991758
rs1109037	722	2	0.500229	0.374768	0.366948	0.633052	0.481994	0.172226	0.965241
rs1294331	716	2	0.473134	0.360858	0.38858	0.61142	0.469274	0.162001	0.942105
rs12997453	722	2	0.491088	0.370158	0.379885	0.620115	0.490305	0.179157	0.980978
rs13182883	722	2	0.466019	0.357087	0.403626	0.596374	0.487535	0.176824	0.975676
rs13218440	722	2	0.470941	0.359703	0.388111	0.611889	0.462604	0.156822	0.930412
rs1335873	722	2	0.364902	0.298004	0.469188	0.530812	0.34626	0.084411	0.764831
rs1336071	714	2	0.493437	0.371347	0.362349	0.637651	0.453782	0.15016	0.915385
rs1355366	710	2	0.496887	0.373086	0.37952	0.62048	0.501408	0.188735	1.00282
rs1357617	714	2	0.385824	0.311062	0.452299	0.547701	0.386555	0.105952	0.815068
rs1360288	722	2	0.440662	0.343229	0.413264	0.586736	0.448753	0.146458	0.907035
rs1382387	722	2	0.410756	0.32606	0.425296	0.574704	0.371191	0.0973383	0.795154
rs1413212	722	2	0.384373	0.310174	0.457678	0.542322	0.407202	0.11836	0.843458
rs1454361	722	2	0.497681	0.373491	0.384474	0.615526	0.512465	0.198642	1.02557
rs1463729	722	2	0.476105	0.362421	0.397503	0.602497	0.495845	0.18389	0.991758
rs1490413	722	2	0.497681	0.373491	0.359305	0.640695	0.457064	0.152614	0.920918
rs1493232	722	2	0.45588	0.351623	0.410011	0.589989	0.479224	0.16996	0.960106
rs1498553	722	2	0.500229	0.374768	0.380453	0.619547	0.509695	0.196125	1.01977
rs1523537	722	2	0.489901	0.369553	0.390766	0.609234	0.509695	0.196125	1.01977
rs1528460	722	2	0.428583	0.336402	0.411791	0.588209	0.398892	0.113248	0.831797
rs159606	722	2	0.42539	0.334573	0.424007	0.575993	0.434903	0.136605	0.884804
rs1736442	556	2	0.470931	0.359595	0.406734	0.593266	0.503597	0.190667	1.00725
rs1821380	722	2	0.486862	0.367999	0.36618	0.63382	0.445983	0.144447	0.9025
rs1886510	722	2	0.500448	0.374877	0.370539	0.629461	0.490305	0.179157	0.980978
rs1979255	722	2	0.447197	0.346862	0.409719	0.590281	0.457064	0.152614	0.920918
rs2040411	722	2	0.456706	0.352072	0.418237	0.581763	0.498615	0.186291	0.997238
rs2046361	722	2	0.421026	0.332057	0.435855	0.564145	0.457064	0.152614	0.920918
rs2056277	722	2	0.366343	0.298917	0.467653	0.532347	0.34349	0.083051	0.761603
rs2076848	722	2	0.4907	0.369961	0.38429	0.61571	0.498615	0.186291	0.997238
rs2107612	722	2	0.414248	0.328111	0.431941	0.568059	0.423823	0.129079	0.867788
rs2111980	722	2	0.497236	0.373268	0.400956	0.599044	0.540166	0.225127	1.08735
rs214955	722	2	0.497001	0.37315	0.358967	0.641033	0.454294	0.150541	0.916244
rs221956	722	2	0.421026	0.332057	0.437957	0.562043	0.462604	0.156822	0.930412
rs2269355	722	2	0.492913	0.371085	0.390735	0.609265	0.515235	0.201183	1.03143
rs2342747	720	2	0.421693	0.332442	0.440015	0.559985	0.469444	0.162135	0.942408
rs2399332	722	2	0.447197	0.346862	0.421152	0.578848	0.484765	0.174514	0.97043
rs251934	722	2	0.484461	0.366764	0.405407	0.594593	0.526316	0.211583	1.05556
rs279844	720	2	0.497667	0.373483	0.365293	0.634707	0.472222	0.16433	0.947368
rs2830795	722	2	0.407195	0.323956	0.440535	0.559465	0.429363	0.132803	0.876214
rs2831700	722	2	0.482402	0.3657	0.4175	0.5825	0.542936	0.22791	1.09394
rs2920816	722	2	0.492564	0.370908	0.370999	0.629001	0.473684	0.165494	0.95
rs321198	716	2	0.480447	0.364683	0.405574	0.594426	0.519553	0.20519	1.0407
rs338882	722	2	0.500659	0.374983	0.366518	0.633482	0.481994	0.172226	0.965241
rs354439	716	2	0.476931	0.362851	0.384788	0.615212	0.469274	0.162001	0.942105
rs3780962	720	2	0.498281	0.373791	0.390849	0.609151	0.525	0.210328	1.05263
rs430046	722	2	0.488211	0.36869	0.374191	0.625809	0.470914	0.163294	0.945026
rs4364205	722	2	0.495146	0.372215	0.399652	0.600348	0.534626	0.219636	1.0744
rs445251	722	2	0.476716	0.362741	0.381282	0.618718	0.459834	0.154707	0.925641
rs4530059	722	2	0.471613	0.360058	0.40335	0.59665	0.498615	0.186291	0.997238
rs4606077	722	2	0.353099	0.290443	0.481235	0.518765	0.351801	0.0871758	0.771368
rs560681	722	2	0.43375	0.33934	0.407187	0.592813	0.401662	0.114934	0.835648
rs576261	722	2	0.498999	0.374153	0.397488	0.602512	0.537396	0.22237	1.08084
rs6444724	722	2	0.476716	0.362741	0.379225	0.620775	0.454294	0.150541	0.916244
rs6811238	722	2	0.496759	0.373028	0.360226	0.639774	0.457064	0.152614	0.920918
rs6955448	722	2	0.443509	0.344817	0.422365	0.577635	0.479224	0.16996	0.960106
rs7041158	674	2	0.457529	0.352494	0.399414	0.600586	0.456973	0.152546	0.920765
rs717302	722	2	0.500505	0.374906	0.380177	0.619823	0.509695	0.196125	1.01977
rs719366	716	2	0.46618	0.35717	0.39785	0.60215	0.47486	0.166435	0.952128
rs722098	722	2	0.297452	0.252923	0.539	0.461	0.290859	0.0598507	0.705078
rs722290	722	2	0.500659	0.374983	0.35952	0.64048	0.465374	0.158958	0.935233
rs727811	722	2	0.497462	0.373381	0.42103	0.57897	0.570637	0.257116	1.16452
rs729172	722	2	0.49485	0.372065	0.382939	0.617061	0.504155	0.191162	1.00838
rs733164	722	2	0.381684	0.308515	0.45269	0.54731	0.351801	0.0871758	0.771368
rs735155	722	2	0.498999	0.374153	0.373301	0.626699	0.493075	0.181512	0.986339
rs737681	722	2	0.47486	0.361768	0.388679	0.611321	0.473684	0.165494	0.95
rs740598	722	2	0.453356	0.350247	0.413755	0.586245	0.481994	0.172226	0.965241
rs740910	722	2	0.410756	0.32606	0.429593	0.570407	0.398892	0.113248	0.831797
rs763869	722	2	0.499829	0.374568	0.39006	0.60994	0.526316	0.211583	1.05556
rs8037429	722	2	0.50014	0.374724	0.354839	0.645161	0.451524	0.148489	0.911616
rs8078417	722	2	0.364902	0.298004	0.470784	0.529216	0.368421	0.0958391	0.791667
rs826472	722	2	0.481326	0.365143	0.376678	0.623322	0.459834	0.154707	0.925641
rs873196	722	2	0.479082	0.363976	0.40157	0.59843	0.509695	0.196125	1.01977
rs876724	722	2	0.402338	0.321067	0.43475	0.56525	0.379501	0.101934	0.805804
rs891700	722	2	0.500597	0.374952	0.377199	0.622801	0.504155	0.191162	1.00838
rs901398	722	2	0.431707	0.338181	0.427291	0.572709	0.462604	0.156822	0.930412
rs907100	722	2	0.491088	0.370158	0.391057	0.608943	0.512465	0.198642	1.02557
rs914165	722	2	0.487769	0.368463	0.397396	0.602604	0.518006	0.203747	1.03736
rs917118	722	2	0.390962	0.314206	0.451723	0.548277	0.409972	0.1201	0.847418
rs938283	722	2	0.275691	0.237411	0.560071	0.439929	0.296399	0.0620705	0.71063
rs964681	722	2	0.495146	0.372215	0.378489	0.621511	0.495845	0.18389	0.991758
rs987640	722	2	0.500044	0.374676	0.369649	0.630351	0.487535	0.176824	0.975676
rs9905977	722	2	0.414248	0.328111	0.436867	0.563133	0.440443	0.140486	0.893564
rs993934	722	2	0.471613	0.360058	0.40335	0.59665	0.498615	0.186291	0.997238
rs9951171	722	2	0.491842	0.370541	0.365137	0.634863	0.457064	0.152614	0.920918
	Median		0.45756	0.351318	0.405905	0.594095	0.46184	0.160366	0.938499
	Standard Dev.		0.0493578	0.0285899	0.0376106	0.0376106	0.0561092	0.0397737	0.0910116
	Minimum		0.275691	0.237411	0.354839	0.439929	0.290859	0.0598507	0.705078
	Maximum		0.500659	0.374983	0.560071	0.645161	0.570637	0.257116	1.16452
	Range		0.224968	0.137572	0.205232	0.205232	0.279778	0.197265	0.459438
	Q1		0.427785	0.335945	0.380104	0.575671	0.439058	0.139516	0.891374
	Q3		0.49618	0.372736	0.424329	0.619896	0.503737	0.190791	1.00753
	IQR		0.0683953	0.0367915	0.0442254	0.0442254	0.0646785	0.0512749	0.116156

## Sheet: Hispanic
Supplementary Table S2 to: Kiesler et al., U.S. population data for 94 identity informative SNP loci. Genes (2023)
Locus	N	Nall	GD	PIC	PM	PD	Hobs	PE	TPI
rs1005533	472	2	0.489402	0.369115	0.371409	0.628591	0.466102	0.159522	0.936508
rs10092491	472	2	0.481189	0.364888	0.384911	0.615089	0.478814	0.169625	0.95935
rs1015250	472	2	0.37791	0.306004	0.457304	0.542696	0.360169	0.0914677	0.781457
rs1024116	472	2	0.501026	0.374982	0.398916	0.601084	0.542373	0.227342	1.09259
rs1028528	472	2	0.37791	0.306004	0.456729	0.543271	0.351695	0.0871225	0.771242
rs1031825	378	2	0.426536	0.334922	0.413006	0.586994	0.391534	0.108855	0.821739
rs10488710	470	2	0.472613	0.3604	0.415917	0.584083	0.523404	0.208813	1.04911
rs10495407	472	2	0.447722	0.34697	0.397695	0.602305	0.419492	0.12622	0.861314
rs1058083	472	2	0.496302	0.372614	0.377657	0.622343	0.495763	0.183819	0.991597
rs10773760	472	2	0.483645	0.366159	0.377155	0.622845	0.466102	0.159522	0.936508
rs10776839	472	2	0.49498	0.371947	0.389974	0.610026	0.516949	0.202766	1.03509
rs1109037	472	2	0.498759	0.373848	0.373169	0.626831	0.491525	0.180192	0.983333
rs1294331	472	2	0.484427	0.366563	0.378088	0.621912	0.470339	0.162839	0.944
rs12997453	472	2	0.477662	0.363052	0.37263	0.62737	0.436441	0.137674	0.887218
rs13182883	472	2	0.470798	0.359444	0.378196	0.621804	0.432203	0.134743	0.880597
rs13218440	472	2	0.480334	0.364444	0.395684	0.604316	0.5	0.1875	1
rs1335873	472	2	0.467586	0.35774	0.41055	0.58945	0.504237	0.191235	1.00855
rs1336071	472	2	0.501026	0.374982	0.366992	0.633008	0.483051	0.173095	0.967213
rs1355366	472	2	0.424916	0.334121	0.421574	0.578426	0.423729	0.129016	0.867647
rs1357617	472	2	0.344309	0.284556	0.489945	0.510055	0.322034	0.073005	0.7375
rs1360288	472	2	0.390217	0.313578	0.444089	0.555911	0.34322	0.0829192	0.76129
rs1382387	472	2	0.405619	0.322845	0.435758	0.564242	0.402542	0.115473	0.836879
rs1413212	472	2	0.42157	0.332192	0.42732	0.57268	0.432203	0.134743	0.880597
rs1454361	472	2	0.496707	0.372818	0.375215	0.624785	0.491525	0.180192	0.983333
rs1463729	472	2	0.489402	0.369115	0.371409	0.628591	0.466102	0.159522	0.936508
rs1490413	472	2	0.500918	0.374928	0.384049	0.615951	0.516949	0.202766	1.03509
rs1493232	472	2	0.480334	0.364444	0.371301	0.628699	0.440678	0.140652	0.893939
rs1498553	472	2	0.500981	0.37496	0.377226	0.622774	0.504237	0.191235	1.00855
rs1523537	472	2	0.460677	0.354038	0.392308	0.607692	0.444915	0.143677	0.900763
rs1528460	470	2	0.466189	0.356993	0.39368	0.60632	0.46383	0.157765	0.93254
rs159606	472	2	0.478571	0.363527	0.385701	0.614299	0.474576	0.166207	0.951613
rs1736442	376	2	0.441404	0.343329	0.397635	0.602365	0.388298	0.106962	0.817391
rs1821380	472	2	0.491849	0.370361	0.397874	0.602126	0.525424	0.210731	1.05357
rs1886510	472	2	0.481189	0.364888	0.396976	0.603024	0.504237	0.191235	1.00855
rs1979255	472	2	0.490041	0.369441	0.369111	0.630889	0.461864	0.156255	0.929134
rs2040411	472	2	0.437583	0.341322	0.423118	0.576882	0.466102	0.159522	0.936508
rs2046361	472	2	0.439086	0.342165	0.402363	0.597637	0.402542	0.115473	0.836879
rs2056277	472	2	0.327243	0.273232	0.513394	0.486606	0.266949	0.050817	0.682081
rs2076848	472	2	0.449099	0.347729	0.426853	0.573147	0.5	0.1875	1
rs2107612	472	2	0.399978	0.319478	0.444269	0.555731	0.415254	0.123469	0.855072
rs2111980	472	2	0.500981	0.37496	0.368967	0.631033	0.487288	0.176617	0.975207
rs214955	472	2	0.497463	0.373198	0.378591	0.621409	0.5	0.1875	1
rs221956	472	2	0.460677	0.354038	0.380817	0.619183	0.402542	0.115473	0.836879
rs2269355	472	2	0.49588	0.372401	0.364945	0.635055	0.466102	0.159522	0.936508
rs2342747	472	2	0.474828	0.361568	0.376795	0.623205	0.440678	0.140652	0.893939
rs2399332	472	2	0.469745	0.358887	0.39633	0.60367	0.478814	0.169625	0.95935
rs251934	472	2	0.444915	0.345417	0.405307	0.594693	0.436441	0.137674	0.887218
rs279844	472	2	0.501062	0.375	0.37087	0.62913	0.491525	0.180192	0.983333
rs2830795	472	2	0.351353	0.289145	0.482728	0.517272	0.334746	0.0788538	0.751592
rs2831700	472	2	0.49588	0.372401	0.398844	0.601156	0.533898	0.218922	1.07273
rs2920816	470	2	0.450029	0.348239	0.399475	0.600525	0.434043	0.136009	0.883459
rs321198	470	2	0.491775	0.370321	0.361919	0.638081	0.446809	0.145044	0.903846
rs338882	472	2	0.497463	0.373198	0.382936	0.617064	0.508475	0.195024	1.01724
rs354439	466	2	0.46327	0.355426	0.3917	0.6083	0.450644	0.147842	0.910156
rs3780962	472	2	0.494503	0.371706	0.358554	0.641446	0.444915	0.143677	0.900763
rs430046	472	2	0.470798	0.359444	0.414105	0.585895	0.516949	0.202766	1.03509
rs4364205	472	2	0.490041	0.369441	0.388143	0.611857	0.504237	0.191235	1.00855
rs445251	472	2	0.486667	0.367715	0.377621	0.622379	0.474576	0.166207	0.951613
rs4530059	472	2	0.45823	0.352716	0.397695	0.602305	0.45339	0.149869	0.914729
rs4606077	472	2	0.405619	0.322845	0.435758	0.564242	0.402542	0.115473	0.836879
rs560681	472	2	0.386187	0.311114	0.44847	0.55153	0.351695	0.0871225	0.771242
rs576261	472	2	0.500486	0.374713	0.37992	0.62008	0.508475	0.195024	1.01724
rs6444724	472	2	0.500981	0.37496	0.377226	0.622774	0.504237	0.191235	1.00855
rs6811238	472	2	0.499973	0.374456	0.369973	0.630027	0.487288	0.176617	0.975207
rs6955448	472	2	0.407463	0.323938	0.434825	0.565175	0.40678	0.118096	0.842857
rs7041158	452	2	0.481241	0.364892	0.399366	0.600634	0.50885	0.195362	1.01802
rs717302	472	2	0.459462	0.353383	0.384911	0.615089	0.415254	0.123469	0.855072
rs719366	472	2	0.392206	0.314788	0.446747	0.553253	0.389831	0.107856	0.819444
rs722098	472	2	0.481189	0.364888	0.377945	0.622055	0.461864	0.156255	0.929134
rs722290	472	2	0.497814	0.373374	0.358194	0.641806	0.45339	0.149869	0.914729
rs727811	472	2	0.498462	0.373699	0.371481	0.628519	0.487288	0.176617	0.975207
rs729172	472	2	0.45823	0.352716	0.392021	0.607979	0.436441	0.137674	0.887218
rs733164	472	2	0.449099	0.347729	0.397443	0.602557	0.423729	0.129016	0.867647
rs735155	472	2	0.501026	0.374982	0.370906	0.629094	0.491525	0.180192	0.983333
rs737681	472	2	0.42157	0.332192	0.415003	0.584997	0.372881	0.098261	0.797297
rs740598	472	2	0.470798	0.359444	0.40107	0.59893	0.491525	0.180192	0.983333
rs740910	472	2	0.45312	0.349936	0.402794	0.597206	0.45339	0.149869	0.914729
rs763869	472	2	0.474828	0.361568	0.382685	0.617315	0.457627	0.153038	0.921875
rs8037429	472	2	0.500918	0.374928	0.359918	0.640082	0.466102	0.159522	0.936508
rs8078417	472	2	0.450457	0.348476	0.394966	0.605034	0.419492	0.12622	0.861314
rs826472	472	2	0.384145	0.30986	0.458094	0.541906	0.40678	0.118096	0.842857
rs873196	472	2	0.412888	0.327136	0.426853	0.573147	0.394068	0.110354	0.825175
rs876724	472	2	0.42157	0.332192	0.42732	0.57268	0.432203	0.134743	0.880597
rs891700	472	2	0.476735	0.362568	0.395145	0.604855	0.491525	0.180192	0.983333
rs901398	472	2	0.461873	0.354683	0.414105	0.585895	0.5	0.1875	1
rs907100	472	2	0.499541	0.37424	0.408611	0.591389	0.555085	0.240408	1.12381
rs914165	472	2	0.500333	0.374636	0.377873	0.622127	0.504237	0.191235	1.00855
rs917118	472	2	0.472849	0.360527	0.395109	0.604891	0.483051	0.173095	0.967213
rs938283	472	2	0.253158	0.220713	0.590096	0.409904	0.254237	0.0463577	0.670455
rs964681	472	2	0.450457	0.348476	0.408611	0.591389	0.461864	0.156255	0.929134
rs987640	472	2	0.494008	0.371456	0.382038	0.617962	0.5	0.1875	1
rs9905977	472	2	0.442036	0.343815	0.40818	0.59182	0.436441	0.137674	0.887218
rs993934	472	2	0.460677	0.354038	0.384767	0.615233	0.419492	0.12622	0.861314
rs9951171	472	2	0.490041	0.369441	0.383905	0.616095	0.495763	0.183819	0.991597
	Median		0.459093	0.352151	0.401232	0.598768	0.452324	0.153134	0.921948
	Standard Dev.		0.0454634	0.0264309	0.035599	0.035599	0.0564212	0.0385253	0.0882384
	Minimum		0.253158	0.220713	0.358194	0.409904	0.254237	0.0463577	0.670455
	Maximum		0.501062	0.375	0.590096	0.641806	0.555085	0.240408	1.12381
	Range		0.247904	0.154287	0.231902	0.231902	0.300847	0.19405	0.453355
	Q1		0.441878	0.343694	0.377648	0.585895	0.419492	0.12622	0.861314
	Q3		0.494622	0.371767	0.414105	0.622352	0.495763	0.183819	0.991597
	IQR		0.052744	0.0280728	0.0364568	0.0364568	0.0762712	0.0575988	0.130283
