# Supplementary material for: US Population Data for 94 Identity-Informative SNP Loci
Source: Genes (Basel). 2023 May 12;14(5):1071. doi: 10.3390/genes14051071 (PMC10217833; doi:10.3390/genes14051071)
Supplement: Supplementary file 1 [file genes-14-01071-s001.zip › Table S3 Linkage Disequilibrium.xlsx]

## Sheet: Description
DOI 10.18434/t4/1500024
Supplementary Table S3 to: Kiesler et al., U.S. population data for 94 identity informative SNP loci. Genes (2023)
Description: Syntenic SNP pairs residing on the same cromosome identified through linkage disequilibrium testing in Arlequin Version 3.5 (Excoffier, L. and H.E. L. Lischer (2010) Arlequin suite ver 3.5: A new series of programs to perform population genetics analyses under Linux and Windows. Molecular Ecology Resources. 10: 564-567.) The analysis was performed using genotype values for 1036 U.S. …

## Sheet: L.D. Pairs
Supplementary Table S3 to: Kiesler et al., U.S. population data for 94 identity informative SNP loci. Genes (2023)
Syntenic Pair									Exact T Test p-value by Population
SNP1	Publication*	Chromosome	Position	SNP2	Publication*	Chromosome	Position	Map Distance	Caucasian	U.S. Asian	African American	U.S. Hispanic
rs10495407	Sanchez 2006	1	238276008	rs1490413	Sanchez 2006	1	4307263	233968745	0.46386	0.04525	0.3002	0.63178
rs1413212	Sanchez 2006	1	242643495	rs891700	Sanchez 2006	1	239718626	2924869	0.43	0.91059	0.04436	0.59564
rs1109037	Pakstis 2010	2	9945593	rs876724	Sanchez 2006	2	114974	9830619	0.01446	0.61703	0.69614	0.9705
rs907100	Sanchez 2006	2	238654938	rs993934	Kidd 2012	2	123351637	115303301	0.02584	0.29851	0.2404	0.61356
rs12997453	Pakstis 2010	2	181548532	rs993934	Kidd 2012	2	123351637	58196895	0.99109	0.4297	0.01178	0.67337
rs1109037	Pakstis 2010	2	9945593	rs993934	Kidd 2012	2	123351637	113406044	0.56723	0.57149	0.01495	0.23891
rs1355366	Sanchez 2006	3	191088319	rs1357617	Sanchez 2006	3	920099	190168220	0	0.00891	0.34396	0.40257
rs4364205	Kidd 2012	3	32376152	rs6444724	Kidd 2012	3	193489591	161113439	0.04653	0.79535	0.50356	0.25931
rs2046361	Sanchez 2006	4	10967435	rs279844	Pakstis 2010	4	46327638	35360203	0.33465	0.17386	0.00535	0.30673
rs279844	Pakstis 2010	4	46327638	rs6811238	Pakstis 2010	4	168742464	122414826	0.97832	0.40218	0.8295	0.03901
rs13182883	Pakstis 2010	5	137297649	rs338882	Kidd 2012	5	179263724	41966075	0.00376	0.13614	0.61535	0.62683
rs159606	Kidd 2012	5	17374789	rs717302	Sanchez 2006	5	2879281	14495508	0.19366	0.25168	0.04406	0.56752
rs159606	Kidd 2012	5	17374789	rs338882	Kidd 2012	5	179263724	161888935	0.6896	0.77455	0.70426	0.01703
rs214955	Kidd 2012	6	152376571	rs727811	Sanchez 2006	6	164624301	12247730	0.31208	0.63634	0.01683	0.99149
rs6955448	Kidd 2012	7	4270733	rs917118	Sanchez 2006	7	4417372	146639	0.00733	0.29277	0.08881	0.60901
rs6955448	Kidd 2012	7	4270733	rs737681	Sanchez 2006	7	156198119	151927386	0.03158	0.29752	0.49376	0.93257
rs321198	Pakstis 2010	7	137345092	rs6955448	Kidd 2012	7	4270733	133074359	0.03267	0.83832	0.02426	0.61901
rs10092491	Kidd 2012	8	28553555	rs763869	Sanchez 2006	8	1427444	27126111	0.47267	0.04238	0.27307	0.97594
rs1015250	Sanchez 2006	9	1823774	rs7041158	Kidd 2012	9	27985940	26162166	0.00158	0.75703	0.30376	0.51842
rs1015250	Sanchez 2006	9	1823774	rs10776839	Kidd 2012	9	134525462	132701688	0.04188	0.00347	0.0095	0.06772
rs10776839	Kidd 2012	9	134525462	rs1463729	Sanchez 2006	9	124119169	10406293	0.50762	0.83158	0.01842	0.18277
rs1015250	Sanchez 2006	9	1823774	rs1360288	Sanchez 2006	9	126205784	124382010	0.41089	0.35277	0.6504	0.01287
rs735155	Sanchez 2006	10	3331986	rs826472	Sanchez 2006	10	2364437	967549	0.28446	0.0395	0.62297	0.35455
rs826472	Sanchez 2006	10	2364437	rs964681	Sanchez 2006	10	130900156	128535719	0.17228	0.87248	0.02762	0.07653
rs1498553	Pakstis 2010	11	5687798	rs901398	Sanchez 2006	11	11074674	5386876	0.67129	0.37624	0.92851	0.03891
rs2111980	Sanchez 2006	12	105934476	rs2269355	Pakstis 2010	12	6836750	99097726	0.79238	0.04535	0.73693	0.88822
rs1058083	Kidd 2012	13	99385979	rs354439	Sanchez 2006	13	106286062	6900083	0.00634	0.31079	0.73307	0.66505
rs1335873	Sanchez 2006	13	20327585	rs1886510	Sanchez 2006	13	21800561	1472976	0.15455	0.88376	0.0004	0.30356
rs1454361	Sanchez 2006	14	25381626	rs722290	Kidd 2012	14	52750005	27368379	0.71139	0.03614	0.0798	0.46188
rs1821380	Pakstis 2010	15	39021201	rs8037429	Sanchez 2006	15	53324712	14303511	0.01119	0.04584	0.27446	0.24525
rs1528460	Sanchez 2006	15	54918507	rs8037429	Sanchez 2006	15	53324712	1593795	0.48624	0.34772	0.02842	0.48693
rs740910	Sanchez 2006	17	5803303	rs8078417	Pakstis 2010	17	82504059	76700756	0.72396	0.02584	0.68653	0.44267
rs938283	Sanchez 2006	17	79472416	rs9905977	Kidd 2012	17	3016099	76456317	0.63436	0.03168	0.41386	0.24861
rs445251	Pakstis 2010	20	15144287	rs1031825	Sanchez 2006	20	4466836	10677451	0.02168	0.73376	0.62406	0.63624
rs2831700	Sanchez 2006	21	28307368	rs722098	Sanchez 2006	21	15313279	12994089	0.03683	0.05782	0.0399	0.51139
rs221956	Kidd 2012	21	42186887	rs2831700	Sanchez 2006	21	28307368	13879519	0.0701	0.03149	0.2798	0.31446
*Key to publication field:
Sanchez 2006	Sanchez JJ, Phillips C, Børsting C, et al. A multiplex assay with 52 single nucleotide polymorphisms for human identification. Electrophoresis. 2006 May;27(9):1713-24. DOI: 10.1002/elps.200500671. PMID: 16586411.
Pakstis 2010	Pakstis AJ, Speed WC, Fang R, et al. SNPs for a universal individual identification panel. Hum Genet 2010 Mar;127(3):315–324. DOI:10.1007/s00439-009-0771-1. PMID: 19937056.
Kidd 2012	Kidd KK, Kidd JR, Speed WC, et al. Expanding data and resources for forensic use of SNPs in individual identification. Forensic Sci Int - Gen 2012 Sep;6(5):646-652. DOI: 10.1016/j.fsigen.2012.02.012. PMID: 22445421
