# Supplementary material for: US Population Data for 94 Identity-Informative SNP Loci
Source: Genes (Basel). 2023 May 12;14(5):1071. doi: 10.3390/genes14051071 (PMC10217833; doi:10.3390/genes14051071)
Supplement: Supplementary file 1 [file genes-14-01071-s001.zip › Table S4 Hardy-Weinberg Equilibrium.xlsx]

## Sheet: Description
DOI 10.18434/t4/1500024
Supplementary Table S4 to: Kiesler et al., U.S. population data for 94 identity informative SNP loci. Genes (2023)
Description: Table of Hardy-Weinberg equilibrium test values (population sample number, observed heterozygosity, expected heterozygosity, and p-value) calculated by Arlequin (Excoffier, L. and H.E. L. Lischer (2010) Arlequin suite ver 3.5: A new series of programs to perform population genetics analyses under Linux and Windows. Molecular Ecology Resources. 10: 564-567.) for each population in the…

## Sheet: Table S4
Supplementary Table S4 to: Kiesler et al., U.S. population data for 94 identity informative SNP loci. Genes (2023)
	African American					Caucasian					Asian					Hispanic
	Population Sample # (n)	Observed Heterozygosity	P-value			Population Sample # (n)	Observed Heterozygosity	P-value			Population Sample # (n)	Observed Heterozygosity	P-value			Population Sample # (n)	Observed Heterozygosity	P-value
rs1005533	341	0.50733	0.74227		rs1005533	361	0.50416	0.91636		rs1005533	97	0.35052	0.03964		rs1005533	236	0.4661	0.50447
rs10092491	342	0.49708	0.82542		rs10092491	361	0.50416	0.83245		rs10092491	97	0.46392	0.83201		rs10092491	236	0.47881	1
rs1015250	342	0.48246	0.48702		rs1015250	360	0.325	1		rs1015250	97	0.48454	0.83911		rs1015250	236	0.36017	0.49455
rs1024116	342	0.4386	0.47914		rs1024116	361	0.52355	0.39763		rs1024116	97	0.21649	1		rs1024116	236	0.54237	0.2393
rs1028528	342	0.39766	0.43229		rs1028528	361	0.38781	1		rs1028528	97	0.47423	0.64323		rs1028528	236	0.35169	0.30072
rs10488710	340	0.45294	0.18374		rs10488710	358	0.42458	0.29128		rs10488710	97	0.49485	0.50581		rs10488710	235	0.51915	0.1269
rs10495407	342	0.23684	0.13512		rs10495407	361	0.4349	0.30045		rs10495407	97	0.30928	0.024		rs10495407	236	0.41949	0.37937
rs1058083	342	0.47953	0.82124		rs1058083	361	0.44044	0.56096		rs1058083	97	0.45361	0.4158		rs1058083	236	0.49576	1
rs10773760	342	0.39474	0.43356		rs10773760	361	0.50416	0.67176		rs10773760	97	0.36082	0.15304		rs10773760	236	0.4661	0.591
rs10776839	342	0.40936	0.04403		rs10776839	361	0.49584	0.91535		rs10776839	97	0.39175	0.09035		rs10776839	236	0.51695	0.51209
rs1109037	342	0.49708	1		rs1109037	361	0.48199	0.53072		rs1109037	97	0.47423	1		rs1109037	236	0.49153	0.89503
rs1294331	341	0.49853	0.73912		rs1294331	358	0.46927	0.91269		rs1294331	97	0.46392	0.82108		rs1294331	236	0.47034	0.68639
rs12997453	342	0.47368	1		rs12997453	361	0.4903	1		rs12997453	97	0.53608	0.11673		rs12997453	236	0.43644	0.22087
rs13182883	342	0.46199	0.16414		rs13182883	361	0.48753	0.42744		rs13182883	97	0.41237	0.27959		rs13182883	236	0.4322	0.21646
rs13218440	342	0.45906	0.57024		rs13218440	361	0.4626	0.73796		rs13218440	97	0.47423	1		rs13218440	236	0.5	0.58926
rs1335873	342	0.31871	0.5137		rs1335873	361	0.34626	0.38505		rs1335873	97	0.41237	0.8108		rs1335873	236	0.50424	0.26601
rs1336071	342	0.4386	0.0923		rs1336071	357	0.45378	0.13323		rs1336071	97	0.43299	0.39894		rs1336071	236	0.48305	0.60566
rs1355366	341	0.45161	0.12215		rs1355366	355	0.50141	0.91513		rs1355366	97	0.35052	0.75457		rs1355366	236	0.42373	1
rs1357617	341	0.3607	0.77058		rs1357617	357	0.38655	1		rs1357617	97	0.26804	0.48218		rs1357617	236	0.32203	0.3442
rs1360288	342	0.36257	0.88196		rs1360288	361	0.44875	0.81261		rs1360288	97	0.4433	0.52632		rs1360288	236	0.34322	0.06691
rs1382387	342	0.53801	0.04528		rs1382387	361	0.37119	0.0722		rs1382387	97	0.51546	0.10151		rs1382387	236	0.40254	1
rs1413212	342	0.49123	0.49033		rs1413212	361	0.4072	0.27528		rs1413212	97	0.47423	0.68533		rs1413212	236	0.4322	0.75914
rs1454361	342	0.45322	0.31314		rs1454361	361	0.51247	0.60225		rs1454361	97	0.53608	0.54641		rs1454361	236	0.49153	0.89629
rs1463729	342	0.37427	0.88666		rs1463729	361	0.49584	0.44124		rs1463729	97	0.48454	1		rs1463729	236	0.4661	0.50419
rs1490413	342	0.45322	0.18051		rs1490413	361	0.45706	0.13651		rs1490413	97	0.45361	0.53294		rs1490413	236	0.51695	0.69922
rs1493232	341	0.53079	0.22722		rs1493232	361	0.47922	0.35806		rs1493232	97	0.53608	0.28667		rs1493232	236	0.44068	0.22136
rs1498553	342	0.54386	0.08366		rs1498553	361	0.5097	0.75227		rs1498553	97	0.45361	0.41676		rs1498553	236	0.50424	1
rs1523537	342	0.47368	0.58203		rs1523537	361	0.5097	0.45294		rs1523537	97	0.45361	0.5333		rs1523537	236	0.44492	0.66985
rs1528460	341	0.24927	0.11265		rs1528460	361	0.39889	0.22107		rs1528460	97	0.4433	0.82539		rs1528460	235	0.46383	1
rs159606	342	0.45906	0.63025		rs159606	361	0.4349	0.71113		rs159606	97	0.4433	0.8246		rs159606	236	0.47458	1
rs1821380	342	0.46199	0.81527		rs1821380	361	0.44598	0.12824		rs1821380	97	0.46392	1		rs1821380	236	0.52542	0.35278
rs1886510	342	0.30702	0.18042		rs1886510	361	0.4903	0.75165		rs1886510	97	0.29897	0.74304		rs1886510	236	0.50424	0.49948
rs1979255	342	0.4386	1		rs1979255	361	0.45706	0.72493		rs1979255	97	0.47423	1		rs1979255	236	0.46186	0.42338
rs2040411	342	0.35965	1		rs2040411	361	0.49861	0.08622		rs2040411	97	0.4433	0.66454		rs2040411	236	0.4661	0.36895
rs2046361	342	0.50877	0.74212		rs2046361	361	0.45706	0.13238		rs2046361	97	0.46392	0.83194		rs2046361	236	0.40254	0.23003
rs2056277	342	0.25146	0.36195		rs2056277	361	0.34349	0.24842		rs2056277	97	0.2268	1		rs2056277	236	0.26695	0.00843
rs2076848	342	0.31579	0.2574		rs2076848	361	0.49861	0.83092		rs2076848	97	0.50515	0.52235		rs2076848	236	0.5	0.08401
rs2107612	342	0.45906	0.90701		rs2107612	361	0.42382	0.70439		rs2107612	97	0.24742	0.34882		rs2107612	236	0.41525	0.62727
rs2111980	342	0.42398	0.62062		rs2111980	361	0.54017	0.11284		rs2111980	97	0.46392	1		rs2111980	236	0.48729	0.69677
rs214955	342	0.50877	0.74495		rs214955	361	0.45429	0.11231		rs214955	97	0.51546	0.52425		rs214955	236	0.5	1
rs221956	342	0.45906	1		rs221956	361	0.4626	0.06111		rs221956	97	0.43299	0.82041		rs221956	236	0.40254	0.06555
rs2269355	342	0.49415	0.82928		rs2269355	361	0.51524	0.39267		rs2269355	97	0.43299	0.29865		rs2269355	236	0.4661	0.36029
rs2342747	342	0.46199	1		rs2342747	360	0.46944	0.03406		rs2342747	97	0.38144	0.24702		rs2342747	236	0.44068	0.27204
rs2399332	342	0.48538	0.82583		rs2399332	361	0.48476	0.12597		rs2399332	97	0.47423	0.23355		rs2399332	236	0.47881	0.784
rs251934	342	0.3655	1		rs251934	361	0.52632	0.10302		rs251934	97	0.34021	1		rs251934	236	0.43644	0.77155
rs279844	342	0.53801	0.19418		rs279844	360	0.47222	0.34134		rs279844	97	0.47423	0.68323		rs279844	236	0.49153	0.79558
rs2830795	342	0.22515	0.26192		rs2830795	361	0.42936	0.36722		rs2830795	97	0.4433	0.31005		rs2830795	236	0.33475	0.45881
rs2831700	342	0.44737	1		rs2831700	361	0.54294	0.02299		rs2831700	97	0.48454	0.8396		rs2831700	236	0.5339	0.29152
rs2920816	342	0.49415	0.29181		rs2920816	361	0.47368	0.52149		rs2920816	97	0.45361	1		rs2920816	235	0.43404	0.66442
rs321198	341	0.5132	0.4435		rs321198	358	0.51955	0.14875		rs321198	97	0.50515	1		rs321198	235	0.44681	0.18416
rs338882	341	0.49267	0.82865		rs338882	361	0.48199	0.52475		rs338882	97	0.52577	0.53868		rs338882	236	0.50847	0.79363
rs354439	340	0.45588	0.64325		rs354439	358	0.46927	0.82434		rs354439	97	0.56701	0.21564		rs354439	233	0.45064	0.67368
rs3780962	342	0.51462	0.66515		rs3780962	360	0.525	0.34081		rs3780962	97	0.49485	1		rs3780962	236	0.44492	0.14692
rs430046	342	0.45322	0.38034		rs430046	361	0.47091	0.51295		rs430046	97	0.47423	0.83571		rs430046	236	0.51695	0.16556
rs4364205	342	0.50585	0.65865		rs4364205	361	0.53463	0.13483		rs4364205	97	0.58763	0.09967		rs4364205	236	0.50424	0.68915
rs445251	342	0.4883	1		rs445251	361	0.45983	0.51304		rs445251	97	0.53608	0.03472		rs445251	236	0.47458	0.78857
rs4530059	342	0.44737	0.90314		rs4530059	361	0.49861	0.30959		rs4530059	97	0.50515	0.09073		rs4530059	236	0.45763	1
rs4606077	342	0.50877	0.50886		rs4606077	361	0.3518	1		rs4606077	97	0.43299	0.61268		rs4606077	236	0.40254	1
rs560681	342	0.4269	1		rs560681	361	0.40166	0.1796		rs560681	97	0.50515	0.83462		rs560681	236	0.35169	0.17888
rs576261	342	0.51754	0.37686		rs576261	361	0.5374	0.16955		rs576261	97	0.4433	0.5223		rs576261	236	0.50847	0.89734
rs6444724	342	0.49123	0.82682		rs6444724	361	0.45429	0.38535		rs6444724	97	0.52577	0.40138		rs6444724	236	0.50424	1
rs6811238	342	0.49708	0.91339		rs6811238	361	0.45706	0.13643		rs6811238	97	0.46392	0.54032		rs6811238	236	0.48729	0.79417
rs6955448	342	0.44152	1		rs6955448	361	0.47922	0.15529		rs6955448	97	0.41237	0.79764		rs6955448	236	0.40678	1
rs7041158	331	0.48036	0.55365		rs7041158	337	0.45697	1		rs7041158	93	0.34409	0.12879		rs7041158	226	0.50885	0.40705
rs717302	342	0.49415	1		rs717302	361	0.5097	0.7536		rs717302	97	0.2268	0.67397		rs717302	236	0.41525	0.15581
rs719366	340	0.27059	0.19592		rs719366	358	0.47486	0.73427		rs719366	97	0.39175	0.57676		rs719366	236	0.38983	1
rs722098	342	0.35965	0.10125		rs722098	361	0.29086	0.72398		rs722098	97	0.54639	0.41389		rs722098	236	0.46186	0.58679
rs722290	342	0.51462	0.51488		rs722290	361	0.46537	0.20003		rs722290	97	0.43299	0.29761		rs722290	236	0.45763	0.23972
rs727811	342	0.41813	0.59126		rs727811	361	0.57064	0.00698		rs727811	97	0.37113	0.32883		rs727811	236	0.49153	0.89566
rs729172	342	0.31287	1		rs729172	361	0.50416	0.75026		rs729172	97	0.19588	0.61584		rs729172	236	0.43644	0.47855
rs733164	342	0.41228	0.14719		rs733164	361	0.3518	0.16564		rs733164	97	0.26804	0.206		rs733164	236	0.42373	0.38718
rs735155	342	0.40058	0.36857		rs735155	361	0.49307	0.83382		rs735155	97	0.3299	0.56586		rs735155	236	0.49153	0.79389
rs737681	342	0.52339	0.45225		rs737681	361	0.47368	1		rs737681	97	0.38144	0.38808		rs737681	236	0.37288	0.08909
rs740598	342	0.45322	0.26711		rs740598	361	0.48199	0.24445		rs740598	97	0.39175	0.62631		rs740598	236	0.49153	0.57631
rs740910	342	0.14327	0.70691		rs740910	361	0.39889	0.60997		rs740910	97	0.2268	1		rs740910	236	0.45339	1
rs763869	342	0.52924	0.33094		rs763869	361	0.52632	0.338		rs763869	97	0.37113	0.3284		rs763869	236	0.45763	0.58177
rs8037429	342	0.47661	0.82156		rs8037429	361	0.45152	0.07321		rs8037429	97	0.46392	0.54235		rs8037429	236	0.4661	0.30064
rs8078417	342	0.46491	0.90706		rs8078417	361	0.36842	1		rs8078417	97	0.31959	0.26404		rs8078417	236	0.41949	0.31044
rs826472	342	0.30994	0.25926		rs826472	361	0.45983	0.44308		rs826472	97	0.31959	1		rs826472	236	0.40678	0.39788
rs873196	342	0.39181	0.38149		rs873196	361	0.5097	0.22484		rs873196	97	0.39175	0.06601		rs873196	236	0.39407	0.52787
rs876724	342	0.28363	1		rs876724	361	0.3795	0.2942		rs876724	97	0.36082	0.00771		rs876724	236	0.4322	0.75694
rs891700	342	0.47076	0.28035		rs891700	361	0.50416	0.91515		rs891700	97	0.48454	0.83933		rs891700	236	0.49153	0.68378
rs901398	342	0.46491	0.90886		rs901398	361	0.4626	0.18299		rs901398	97	0.50515	0.66864		rs901398	236	0.5	0.26073
rs907100	342	0.34795	0.87741		rs907100	361	0.51247	0.45503		rs907100	97	0.45361	0.41297		rs907100	236	0.55508	0.09423
rs914165	341	0.38123	0.66074		rs914165	361	0.51801	0.28542		rs914165	97	0.37113	0.16386		rs914165	236	0.50424	1
rs917118	342	0.44152	0.63628		rs917118	361	0.40997	0.42062		rs917118	97	0.35052	0.09456		rs917118	236	0.48305	0.7829
rs938283	342	0.2193	0.80027		rs938283	361	0.2964	0.18194		rs938283	97	0.34021	0.2953		rs938283	236	0.25424	1
rs964681	342	0.42105	0.42314		rs964681	361	0.49584	1		rs964681	97	0.37113	0.23207		rs964681	236	0.46186	0.77305
rs987640	342	0.5	0.91236		rs987640	361	0.48753	0.67296		rs987640	97	0.49485	1		rs987640	236	0.5	0.89593
rs9905977	342	0.39181	0.37991		rs9905977	361	0.44044	0.25276		rs9905977	97	0.43299	0.39571		rs9905977	236	0.43644	0.88257
rs993934	342	0.4269	0.71097		rs993934	361	0.49861	0.31285		rs993934	97	0.4433	0.4069		rs993934	236	0.41949	0.2042
rs9951171	342	0.51462	0.58758		rs9951171	361	0.45706	0.20019		rs9951171	97	0.51546	0.51821		rs9951171	236	0.49576	0.89521
rs1031825	284	0.51761	0.55183		rs1031825	285	0.38246	0.379		rs1031825	78	0.48718	1		rs1031825	189	0.39153	0.30496
rs1736442	284	0.44014	0.47892		rs1736442	277	0.50181	0.3037		rs1736442	93	0.44086	0.80256		rs1736442	188	0.3883	0.13337
