# Supplementary material for: US Population Data for 94 Identity-Informative SNP Loci
Source: Genes (Basel). 2023 May 12;14(5):1071. doi: 10.3390/genes14051071 (PMC10217833; doi:10.3390/genes14051071)
Supplement: Supplementary file 1 [file genes-14-01071-s001.zip › Table S5 Microhaplotype Frequencies.xlsx]

## Sheet: Description
DOI 10.18434/t4/1500024
Supplementary Table S5 to: Kiesler et al., U.S. population data for 94 identity informative SNP loci. Genes (2023)
Description: Table of all microhaplotypes identified in a set of 1036 samples processed with ForenSeq DNA Signature Prep Kit DNA Primer Mix B (Verogen, San Diego CA). The 94 identity informative SNPs in the kit were analyzed with an in-house informatic pipeline based on STRait Razor v3.0 (A. E. Woerner, J. L. King, B. Budowle, Fast STR allele identification with STRait Razor 3.0, Forensic Sci Int…

## Sheet: Frequency Table
Supplementary Table S5 to: Kiesler et al., U.S. population data for 94 identity informative SNP loci. Genes (2023)
		Count					Frequency
Target SNP	Microhaplotype Range, Target SNP, and GRCh38 Variants	Total	AfAm	Asian	Cauc	Hisp	Total	AfAm	Asian	Cauc	Hisp	Sequence
rs1490413	GRCh38-Chr1:4307219-4307273 rs1490413-G	1132	391	112	389	240	0.546332	0.571637	0.57732	0.538781	0.508475	TCAGAACTGCCTGGTGTGGACTGGGCTGATGTGGGTTCTTTGCAGAACTGGCTGG
rs1490413	GRCh38-Chr1:4307219-4307273 rs1490413-A	929	283	82	333	231	0.448359	0.413743	0.42268	0.461219	0.489407	TCAGAACTGCCTGGTGTGGACTGGGCTGATGTGGGTTCTTTGCAAAACTGGCTGG
rs1490413	GRCh38-Chr1:4307219-4307273 rs113167966-G; rs1490413-A	11	10	0	0	1	0.00530888	0.0146199	0	0	0.00211864	TCAGAACTGCCTGGTGTGGGCTGGGCTGATGTGGGTTCTTTGCAAAACTGGCTGG
		2072	684	194	722	472	1	1	1	1	1
rs560681	GRCh38-Chr1:160816871-160816918 rs560681-A	1348	402	113	492	341	0.650579	0.587719	0.582474	0.68144	0.722458	TCCATCTCTATTTACTCAGGTCACAGGACCTTGGGGCCTCCAAGAGTT
rs560681	GRCh38-Chr1:160816871-160816918 rs560681-G	638	206	81	229	122	0.307915	0.30117	0.417526	0.317175	0.258475	TCCATCTCTGTTTACTCAGGTCACAGGACCTTGGGGCCTCCAAGAGTT
rs560681	GRCh38-Chr1:160816871-160816918 rs560681-A; rs60615385-G	81	73	0	1	7	0.0390927	0.106725	0	0.00138504	0.0148305	TCCATCTCTATTTACTCAGGTCACAGGGCCTTGGGGCCTCCAAGAGTT
rs560681	GRCh38-Chr1:160816871-160816918 rs560681-G; rs186550433-T	3	2	0	0	1	0.00144788	0.00292398	0	0	0.00211864	TCCATCTCTGTTTATTCAGGTCACAGGACCTTGGGGCCTCCAAGAGTT
rs560681	GRCh38-Chr1:160816871-160816918 rs755874501-T; rs560681-A	1	1	0	0	0	0.000482625	0.00146199	0	0	0	TCCATTTCTATTTACTCAGGTCACAGGACCTTGGGGCCTCCAAGAGTT
rs560681	GRCh38-Chr1:160816871-160816918 rs201654817-C; rs560681-A	1	0	0	0	1	0.000482625	0	0	0	0.00211864	TCCATCCCTATTTACTCAGGTCACAGGACCTTGGGGCCTCCAAGAGTT
		2072	684	194	722	472	1	1	1	1	1
rs1294331	GRCh38-Chr1:233312640-233312670 rs1294331-C	1245	396	128	442	279	0.603198	0.580645	0.659794	0.617318	0.591102	CAAAAATTCAATAAAAATCCATAACTACACT
rs1294331	GRCh38-Chr1:233312640-233312670 rs1294331-T	818	286	65	274	193	0.396318	0.419355	0.335052	0.382682	0.408898	CAAAAATTCAATAAAAATCCATAACTATACT
rs1294331	GRCh38-Chr1:233312640-233312670 rs1572229195-T; rs1294331-C	1	0	1	0	0	0.000484496	0	0.00515464	0	0	CAAAAATTCAATAAAATTCCATAACTACACT
	*	2064	682	194	716	472	1	1	1	1	1
rs10495407	GRCh38-Chr1:238275955-238276021 rs10495407-G	1509	596	138	463	312	0.728282	0.871345	0.71134	0.641274	0.661017	TCTGCTTCTGGAGATCTCCACTTCCTCTTGGTTGCATTGGATTCTCATTGAAAGTCCTATTCCATTC
rs10495407	GRCh38-Chr1:238275955-238276021 rs10495407-A	559	85	56	259	159	0.269788	0.124269	0.28866	0.358726	0.336864	TCTGCTTCTGGAGATCTCCACTTCCTCTTGGTTGCATTGGATTCTCATTGAAAATCCTATTCCATTC
rs10495407	GRCh38-Chr1:238275955-238276021 rs10495407-G; rs187062753-G	2	2	0	0	0	0.000965251	0.00292398	0	0	0	TCTGCTTCTGGAGATCTCCACTTCCTCTTGGTTGCATTGGATTCTCATTGAAAGTCCTAGTCCATTC
rs10495407	GRCh38-Chr1:238275955-238276021 rs10495407-G; rs573470824-T	2	1	0	0	1	0.000965251	0.00146199	0	0	0.00211864	TCTGCTTCTGGAGATCTCCACTTCCTCTTGGTTGCATTGGATTCTCATTGAAAGTCCTATTTCATTC
		2072	684	194	722	472	1	1	1	1	1
rs891700	GRCh38-Chr1:239718626-239718642 rs891700-G	1084	339	91	366	288	0.523166	0.495614	0.469072	0.506925	0.610169	GCTTGCATAGTTCTAAG
rs891700	GRCh38-Chr1:239718626-239718642 rs891700-A	988	345	103	356	184	0.476834	0.504386	0.530928	0.493075	0.389831	ACTTGCATAGTTCTAAG
		2072	684	194	722	472	1	1	1	1	1
rs1413212	GRCh38-Chr1:242643488-242643508 rs1413212-C	1381	424	92	535	330	0.666506	0.619883	0.474227	0.740997	0.699153	TGAAATGCCCCATGCTCCACC
rs1413212	GRCh38-Chr1:242643488-242643508 rs1413212-T	691	260	102	187	142	0.333494	0.380117	0.525773	0.259003	0.300847	TGAAATGTCCCATGCTCCACC
		2072	684	194	722	472	1	1	1	1	1
rs876724	GRCh38-Chr2:114970-115036 rs876724-C; rs300773-T	1003	353	78	395	177	0.484541	0.517595	0.402062	0.547091	0.375	AGTACATTTTTTGTCACACTCTGCTAACTGCCTGCTCATAGATATTCAAATTTAGTAGATGTAGATA
rs876724	GRCh38-Chr2:114970-115036 rs876724-T; rs300773-T	546	114	89	201	142	0.263768	0.167155	0.458763	0.278393	0.300847	AGTATATTTTTTGTCACACTCTGCTAACTGCCTGCTCATAGATATTCAAATTTAGTAGATGTAGATA
rs876724	GRCh38-Chr2:114970-115036 rs876724-C	422	138	19	123	142	0.203865	0.202346	0.0979381	0.17036	0.300847	AGTACATTTTTTGTCACACTCTGCTAACTGCCTGCTCATAGATATTCAAATTTAGTAGATGTAGACA
rs876724	GRCh38-Chr2:114970-115036 rs876724-C; rs77642176-C; rs300773-T	62	44	8	3	7	0.0299517	0.0645161	0.0412371	0.00415512	0.0148305	AGTACATTTTTTCTCACACTCTGCTAACTGCCTGCTCATAGATATTCAAATTTAGTAGATGTAGATA
rs876724	GRCh38-Chr2:114970-115036 rs876724-C; rs114448669-C; rs300773-T	37	33	0	0	4	0.0178744	0.0483871	0	0	0.00847458	AGTACATTTTTTGTCACACTCTGCTAACTGCCTGCTCATAGATATTCAAATTTAGTAGATGTACATA
	**	2070	682	194	722	472	1	1	1	1	1
rs1109037	GRCh38-Chr2:9945582-9945659 rs1109037-G	766	319	56	246	145	0.369691	0.466374	0.28866	0.34072	0.307203	CCAGTTTCTCCGGAGTGGAAAGACTTTCATCTCGCACTGGCACGACCTTGAGACCCCGGGTTCTGATGAACTGGGGGG
rs1109037	GRCh38-Chr2:9945582-9945659 rs1109037-A	630	228	40	223	139	0.304054	0.333333	0.206186	0.308864	0.294492	CCAGTTTCTCCAGAGTGGAAAGACTTTCATCTCGCACTGGCACGACCTTGAGACCCCGGGTTCTGATGAACTGGGGGG
rs1109037	GRCh38-Chr2:9945582-9945659 rs1109037-A; rs1109038-A	343	77	36	149	81	0.165541	0.112573	0.185567	0.206371	0.17161	CCAGTTTCTCCAGAGTGGAAAGACTTTCATCTCGCACTGGCACGACCTTGAGACCCCGGGTTCTGATGAACTGGGAGG
rs1109037	GRCh38-Chr2:9945582-9945659 rs1109037-G; rs1109038-A	331	59	61	104	107	0.159749	0.0862573	0.314433	0.144044	0.226695	CCAGTTTCTCCGGAGTGGAAAGACTTTCATCTCGCACTGGCACGACCTTGAGACCCCGGGTTCTGATGAACTGGGAGG
rs1109037	GRCh38-Chr2:9945582-9945659 rs1109037-A; rs962820927-C	1	1	0	0	0	0.000482625	0.00146199	0	0	0	CCAGTTTCTCCAGAGTGGAAAGACTTTCATCTCGCACTGGCACGACCTTCAGACCCCGGGTTCTGATGAACTGGGGGG
rs1109037	GRCh38-Chr2:9945582-9945659 rs1109037-G; rs183533496-T; rs1109038-A	1	0	1	0	0	0.000482625	0	0.00515464	0	0	CCAGTTTCTCCGGAGTGGAAAGACTTTCATCTCGCACTGGCATGACCTTGAGACCCCGGGTTCTGATGAACTGGGAGG
		2072	684	194	722	472	1	1	1	1	1
rs993934	GRCh38-Chr2:123351571-123351640 rs993934-A	1329	464	115	447	303	0.641409	0.678363	0.592784	0.619114	0.641949	TTTGCTTTGTAAGGCAATAGAGCAAAGTATTGTGATAACAGTCTCCAGAGTATATTAGCTTAGTTCATAA
rs993934	GRCh38-Chr2:123351571-123351640 rs993934-G	742	220	79	274	169	0.358108	0.321637	0.407216	0.379501	0.358051	TTTGCTTTGTAAGGCAATAGAGCAAAGTATTGTGATAACAGTCTCCAGAGTATATTAGCTTAGTTCGTAA
rs993934	GRCh38-Chr2:123351571-123351640 rs879387931-A; rs993934-A	1	0	0	1	0	0.000482625	0	0	0.00138504	0	TTTGCTTTGTAAGGCAATAGAGCAAAGAATTGTGATAACAGTCTCCAGAGTATATTAGCTTAGTTCATAA
		2072	684	194	722	472	1	1	1	1	1
rs12997453	GRCh38-Chr2:181548493-181548547 rs12997453-G	1248	424	126	411	287	0.602317	0.619883	0.649485	0.569252	0.608051	TTTTATGCTTTAAAGATACAGGTTATCTGTATTACATTGGGTTTTTACCTACCTT
rs12997453	GRCh38-Chr2:181548493-181548547 rs12997453-A	451	111	30	212	98	0.217664	0.162281	0.154639	0.293629	0.207627	TTTTATGCTTTAAAGATACAGGTTATCTGTATTACATTGAGTTTTTACCTACCTT
rs12997453	GRCh38-Chr2:181548493-181548547 rs72883670-T; rs12997453-A	371	147	38	99	87	0.179054	0.214912	0.195876	0.137119	0.184322	TTTTATGCTTTAAAGATATAGGTTATCTGTATTACATTGAGTTTTTACCTACCTT
rs12997453	GRCh38-Chr2:181548493-181548547 rs375617532-C; rs72883670-T; rs12997453-A	2	2	0	0	0	0.000965251	0.00292398	0	0	0	TTTCATGCTTTAAAGATATAGGTTATCTGTATTACATTGAGTTTTTACCTACCTT
		2072	684	194	722	472	1	1	1	1	1
rs907100	GRCh38-Chr2:238654924-238654989 rs907100-G	903	155	88	411	249	0.435811	0.226608	0.453608	0.569252	0.527542	TGATGCCCTGGCATGAAAGAAGGCTCCAACTGGGCTTCTTTTCTGTGTTTTCCAAGGCTTGGAAAG
rs907100	GRCh38-Chr2:238654924-238654989 rs907100-C	788	451	87	125	125	0.380309	0.659357	0.448454	0.17313	0.264831	TGATGCCCTGGCATCAAAGAAGGCTCCAACTGGGCTTCTTTTCTGTGTTTTCCAAGGCTTGGAAAG
rs907100	GRCh38-Chr2:238654924-238654989 rs907100-C; rs11689319-A	380	78	19	186	97	0.183398	0.114035	0.0979381	0.257618	0.205508	TGATGCCCTGGCATCAAAGAAGGCTCCAACTGAGCTTCTTTTCTGTGTTTTCCAAGGCTTGGAAAG
rs907100	GRCh38-Chr2:238654924-238654989 rs907100-C; rs11689319-A; rs1428070270-G	1	0	0	0	1	0.000482625	0	0	0	0.00211864	TGATGCCCTGGCATCAAAGAAGGCTCCAACTGAGCTGCTTTTCTGTGTTTTCCAAGGCTTGGAAAG
		2072	684	194	722	472	1	1	1	1	1
rs1357617	GRCh38-Chr3:920039-920107 rs1357617-T	1559	505	160	526	368	0.757532	0.742647	0.824742	0.738764	0.779661	GAATTGAAAAGCCCAATTAGAGATTAGAATAGGGATAGCTGATAAGAAACATGACCAAGCTCCCCAAAT
rs1357617	GRCh38-Chr3:920039-920107 rs1357617-A	489	165	34	186	104	0.237609	0.242647	0.175258	0.261236	0.220339	GAATTGAAAAGCCCAATTAGAGATTAGAATAGGGATAGCTGATAAGAAACATGACCAAGCACCCCAAAT
rs1357617	GRCh38-Chr3:920039-920107 rs145504328-A; rs1357617-T	6	6	0	0	0	0.00291545	0.00882353	0	0	0	GAATTGAAAAGCCCAATTAGAAATTAGAATAGGGATAGCTGATAAGAAACATGACCAAGCTCCCCAAAT
rs1357617	GRCh38-Chr3:920039-920107 rs535295485-A; rs1357617-T	3	3	0	0	0	0.00145773	0.00441176	0	0	0	GAATTGAAAAGCCCAATTAGAGATTAGAATAGAGATAGCTGATAAGAAACATGACCAAGCTCCCCAAAT
rs1357617	GRCh38-Chr3:920039-920107 ss2137544435-T; rs1357617-T	1	1	0	0	0	0.000485909	0.00147059	0	0	0	GAATTGAAAAGTCCAATTAGAGATTAGAATAGGGATAGCTGATAAGAAACATGACCAAGCTCCCCAAAT
	*	2058	680	194	712	472	1	1	1	1	1
rs4364205	GRCh38-Chr3:32376108-32376161 rs4364205-G	1166	389	107	399	271	0.562741	0.568713	0.551546	0.552632	0.574153	TTCCAGTCCTAGATATCCACCCATGAGAAATATATCCACAAAAAGATTGAGCAA
rs4364205	GRCh38-Chr3:32376108-32376161 rs4364205-T	906	295	87	323	201	0.437259	0.431287	0.448454	0.447368	0.425847	TTCCAGTCCTAGATATCCACCCATGAGAAATATATCCACAAAAATATTGAGCAA
		2072	684	194	722	472	1	1	1	1	1
rs2399332	GRCh38-Chr3:110582177-110582286 rs2399334-T; rs2399333-T; rs2399332-G	1179	326	124	457	272	0.569015	0.476608	0.639175	0.632964	0.576271	ATTGGGTTTTGATTTACATTTCTCTCATGATTAGTGACTTTGAACATTTTTTCAAGTTTGTTGGCTTCTTTTGAGAAGTATCTGTTCATGTATTTTGCTGATGTTTTAAT
rs2399332	GRCh38-Chr3:110582177-110582286 rs2399332-T	721	250	58	240	173	0.347973	0.365497	0.298969	0.33241	0.366525	ACTGGGTTTTGATTTACATTTCTCTCATGATTAGTGACGTTGAACATTTTTTCAAGTTTGTTGGCTTCTTTTGAGAAGTATCTGTTCATGTATTTTGCTGATTTTTTAAT
rs2399332	GRCh38-Chr3:110582177-110582286 rs2399332-G	93	59	10	9	15	0.0448842	0.0862573	0.0515464	0.0124654	0.0317797	ACTGGGTTTTGATTTACATTTCTCTCATGATTAGTGACGTTGAACATTTTTTCAAGTTTGTTGGCTTCTTTTGAGAAGTATCTGTTCATGTATTTTGCTGATGTTTTAAT
rs2399332	GRCh38-Chr3:110582177-110582286 rs2399333-T; rs2399332-T	40	35	0	2	3	0.019305	0.0511696	0	0.00277008	0.00635593	ACTGGGTTTTGATTTACATTTCTCTCATGATTAGTGACTTTGAACATTTTTTCAAGTTTGTTGGCTTCTTTTGAGAAGTATCTGTTCATGTATTTTGCTGATTTTTTAAT
rs2399332	GRCh38-Chr3:110582177-110582286 rs2399333-T; rs2399332-G	22	1	0	13	8	0.0106178	0.00146199	0	0.0180055	0.0169492	ACTGGGTTTTGATTTACATTTCTCTCATGATTAGTGACTTTGAACATTTTTTCAAGTTTGTTGGCTTCTTTTGAGAAGTATCTGTTCATGTATTTTGCTGATGTTTTAAT
rs2399332	GRCh38-Chr3:110582177-110582286 rs2399334-T; rs2399332-T	11	9	0	1	1	0.00530888	0.0131579	0	0.00138504	0.00211864	ATTGGGTTTTGATTTACATTTCTCTCATGATTAGTGACGTTGAACATTTTTTCAAGTTTGTTGGCTTCTTTTGAGAAGTATCTGTTCATGTATTTTGCTGATTTTTTAAT
rs2399332	GRCh38-Chr3:110582177-110582286 rs2399332-T; rs1034998770-INS_T	3	3	0	0	0	0.00144788	0.00438596	0	0	0	ACTGGGTTTTGATTTACATTTCTCTCATGATTAGTGACGTTGAACATTTTTTCAAGTTTGTTGGCTTCTTTTGAGAAGTATCTGTTCATGTATTTTGCTGATTTTTTTAAT
rs2399332	GRCh38-Chr3:110582177-110582286 rs2399334-T; rs2399332-G	2	0	2	0	0	0.000965251	0	0.0103093	0	0	ATTGGGTTTTGATTTACATTTCTCTCATGATTAGTGACGTTGAACATTTTTTCAAGTTTGTTGGCTTCTTTTGAGAAGTATCTGTTCATGTATTTTGCTGATGTTTTAAT
rs2399332	GRCh38-Chr3:110582177-110582286 rs2399333-A; rs2399332-T	1	1	0	0	0	0.000482625	0.00146199	0	0	0	ACTGGGTTTTGATTTACATTTCTCTCATGATTAGTGACATTGAACATTTTTTCAAGTTTGTTGGCTTCTTTTGAGAAGTATCTGTTCATGTATTTTGCTGATTTTTTAAT
		2072	684	194	722	472	1	1	1	1	1
rs1355366	GRCh38-Chr3:191088272-191088347 rs1355366-T	1162	296	154	385	327	0.566277	0.435294	0.793814	0.545326	0.692797	ATCCAGCTGGCACATGTGCTTAGGCCACAACTGGCTTTGGCAAGTCCTCATCCTCGAGGCCTCCAGTGGCTCTGAA
rs1355366	GRCh38-Chr3:191088272-191088347 rs1355366-C	889	384	40	321	144	0.433236	0.564706	0.206186	0.454674	0.305085	ATCCAGCTGGCACATGTGCTTAGGCCACAACTGGCTTTGGCAAGTCCCCATCCTCGAGGCCTCCAGTGGCTCTGAA
rs1355366	GRCh38-Chr3:191088272-191088347 rs1331383921; rs1355366-T	1	0	0	0	1	0.000487329	0	0	0	0.00211864	ATCCAGCTGGTACATGTGCTTAGGCCACAACTGGCTTTGGCAAGTCCTCATCCTCGAGGCCTCCAGTGGCTCTGAA
	*	2052	680	194	706	472	1	1	1	1	1
rs6444724	GRCh38-Chr3:193489543-193489613 rs6444724-T	1108	318	117	440	233	0.534749	0.464912	0.603093	0.609418	0.493644	TTGGAATGGGAGGAAAGGGAAAGGACTAAATTGTTGAACACTGGTTACTGTGCTAGGTATTTACAAACTTG
rs6444724	GRCh38-Chr3:193489543-193489613 rs6444724-C	964	366	77	282	239	0.465251	0.535088	0.396907	0.390582	0.506356	TTGGAATGGGAGGAAAGGGAAAGGACTAAATTGTTGAACACTGGTTACCGTGCTAGGTATTTACAAACTTG
		2072	684	194	722	472	1	1	1	1	1
rs2046361	GRCh38-Chr4:10967394-10967463 rs2046361-T	1241	300	117	505	319	0.598938	0.438596	0.603093	0.699446	0.675847	GATTTGTCTATTTTTGGTCATTGTTGACACTTCACCTTCTATTAATTTTAATTTTGAAAATGATCGTTCA
rs2046361	GRCh38-Chr4:10967394-10967463 rs2046361-A	817	370	77	217	153	0.394305	0.540936	0.396907	0.300554	0.324153	GATTTGTCTATTTTTGGTCATTGTTGACACTTCACCTTCTAATAATTTTAATTTTGAAAATGATCGTTCA
rs2046361	GRCh38-Chr4:10967394-10967463 rs2046361-T; rs116699455-T	14	14	0	0	0	0.00675676	0.0204678	0	0	0	GATTTGTCTATTTTTGGTCATTGTTGACACTTCACCTTCTATTAATTTTAATTTTGAAAATGATCTTTCA
		2072	684	194	722	472	1	1	1	1	1
rs279844	GRCh38-Chr4:46327592-46327708 rs279844-A	1062	346	92	388	236	0.513043	0.505848	0.474227	0.538889	0.5	AAGGATAACAGATTAAGTTCAGTGTCAATTTTGACCAGATATTAAAACTCACAACTCTCTAAACTTCCTTGATATTAACTACTGAACTAATTAATATCCCAGTAGCTTCTGGAGTTT
rs279844	GRCh38-Chr4:46327592-46327708 rs279844-T; rs279845-A	880	225	102	329	224	0.425121	0.328947	0.525773	0.456944	0.474576	AAGGATAACAGATTAAGTTCAGTGTCAATTTTGACCAGATATTAAATCTCACAACTCTCTAAACTTCCTTGATATTAACTACTGAACTAATTAATATCCCAGTAGCTTCTGGAGATT
rs279844	GRCh38-Chr4:46327592-46327708 rs279844-T; rs61621790-A	121	106	0	3	12	0.0584541	0.154971	0	0.00416667	0.0254237	AAGGATAACAGATTAAGTTCAGTGTCAATTTTGACCAGATATTAAATCTCACAACTATCTAAACTTCCTTGATATTAACTACTGAACTAATTAATATCCCAGTAGCTTCTGGAGTTT
rs279844	GRCh38-Chr4:46327592-46327708 rs279844-T	7	7	0	0	0	0.00338164	0.0102339	0	0	0	AAGGATAACAGATTAAGTTCAGTGTCAATTTTGACCAGATATTAAATCTCACAACTCTCTAAACTTCCTTGATATTAACTACTGAACTAATTAATATCCCAGTAGCTTCTGGAGTTT
		2070	684	194	720	472	1	1	1	1	1
rs6811238	GRCh38-Chr4:168742417-168742480 rs6811238-G	1104	382	105	393	224	0.532819	0.55848	0.541237	0.544321	0.474576	CACTGAGAGGAGAAGACTGTGTGTTTTAAAGCCAGGTTTGTTTAAAGGGTTATGATAGTATTAA
rs6811238	GRCh38-Chr4:168742417-168742480 rs6811238-T	967	302	89	329	247	0.466699	0.44152	0.458763	0.455679	0.523305	CACTGAGAGGAGAAGACTGTGTGTTTTAAAGCCAGGTTTGTTTAAAGTGTTATGATAGTATTAA
rs6811238	GRCh38-Chr4:168742417-168742480 rs6811238-G; rs950320966-T	1	0	0	0	1	0.000482625	0	0	0	0.00211864	CACTGAGAGGAGAAGACTGTGTGTTTTAAAGCCAGGTTTGTTTAAAGGGTTATGTTAGTATTAA
		2072	684	194	722	472	1	1	1	1	1
rs1979255	GRCh38-Chr4:189396884-189396929 rs1979255-G	1333	461	122	479	271	0.64334	0.673977	0.628866	0.663435	0.574153	TAGCTTGTGTTGGTCAGGGCATGGAACGTTGGAACTCTTGCTGATC
rs1979255	GRCh38-Chr4:189396884-189396929 rs1979255-C	738	222	72	243	201	0.356178	0.324561	0.371134	0.336565	0.425847	TAGCTTGTGTTGGTCAGGGCATGGAACGTTGGAACTCTTGCTCATC
rs1979255	GRCh38-Chr4:189396884-189396929 rs1046373407-A; rs1979255-G	1	1	0	0	0	0.000482625	0.00146199	0	0	0	TAGCTTGTGTTGGTCAGAGCATGGAACGTTGGAACTCTTGCTGATC
		2072	684	194	722	472	1	1	1	1	1
rs717302	GRCh38-Chr5:2879245-2879308 rs717302-A	1135	309	168	354	304	0.54778	0.451754	0.865979	0.490305	0.644068	AATAAGCTTTAGAAAGGCATATCGTATTAACTGTGTAGTGAACGTCTGTCATTAGGTTTAGCTC
rs717302	GRCh38-Chr5:2879245-2879308 rs717302-G	913	352	26	368	167	0.440637	0.51462	0.134021	0.509695	0.353814	AATAAGCTTTAGAAAGGCATATCGTATTAACTGTGTGGTGAACGTCTGTCATTAGGTTTAGCTC
rs717302	GRCh38-Chr5:2879245-2879308 rs149072431-A; rs717302-G	23	22	0	0	1	0.0111004	0.0321637	0	0	0.00211864	AATAAGCTTTAGAAAGGCATATCATATTAACTGTGTGGTGAACGTCTGTCATTAGGTTTAGCTC
rs717302	GRCh38-Chr5:2879245-2879308 rs717302-G; rs1458228026-A	1	1	0	0	0	0.000482625	0.00146199	0	0	0	AATAAGCTTTAGAAAGGCATATCGTATTAACTGTGTGGTGAACATCTGTCATTAGGTTTAGCTC
		2072	684	194	722	472	1	1	1	1	1
rs159606	GRCh38-Chr5:17374761-17374814 rs159606-G	1369	455	127	501	286	0.660714	0.665205	0.654639	0.693906	0.605932	GTTTCTCATCCTGTTATTATTTGTTTACGTCTGTCTCCTATATTTTATTCTCTC
rs159606	GRCh38-Chr5:17374761-17374814 rs159606-A	702	228	67	221	186	0.338803	0.333333	0.345361	0.306094	0.394068	GTTTCTCATCCTGTTATTATTTGTTTACATCTGTCTCCTATATTTTATTCTCTC
rs159606	GRCh38-Chr5:17374761-17374814 rs159606-A; rs576005112-T	1	1	0	0	0	0.000482625	0.00146199	0	0	0	GTTTCTCATCCTGTTATTATTTGTTTACATCTGTCTCCTATATTTTATTTTCTC
		2072	684	194	722	472	1	1	1	1	1
rs13182883	GRCh38-Chr5:137297586-137297711 rs13182883-G	1222	352	121	456	293	0.589768	0.51462	0.623711	0.631579	0.620763	TGAGGGGAGGGGTCCCTTCTGGCCTAGTAGAGGGCCTGGCCTGCAGTGAGCATTCAAATCCTCGAGGAACAGGGTGGGGAGGTGGGACAAAGGCAGGAAGAAAGTAACGGAGAGCCTGGGGAGACA
rs13182883	GRCh38-Chr5:137297586-137297711 rs13182883-A	848	332	72	266	178	0.409266	0.48538	0.371134	0.368421	0.377119	TGAGGGGAGGGGTCCCTTCTGGCCTAGTAGAGGGCCTGGCCTGCAGTGAGCATTCAAATCCTCAAGGAACAGGGTGGGGAGGTGGGACAAAGGCAGGAAGAAAGTAACGGAGAGCCTGGGGAGACA
rs13182883	GRCh38-Chr5:137297586-137297711 rs13182883-G; rs955356222-C	1	0	0	0	1	0.000482625	0	0	0	0.00211864	TGAGGGGAGGGGTCCCTTCTGGCCTAGTAGAGGGCCTGGCCTGCAGTGAGCATTCAAATCCTCGAGGAACAGGGTGGGGAGGTGGGACAAAGCCAGGAAGAAAGTAACGGAGAGCCTGGGGAGACA
rs13182883	GRCh38-Chr5:137297586-137297711 rs1220236942-C; rs13182883-G	1	0	1	0	0	0.000482625	0	0.00515464	0	0	TGAGGGGAGGGGTCCCTTCCGGCCTAGTAGAGGGCCTGGCCTGCAGTGAGCATTCAAATCCTCGAGGAACAGGGTGGGGAGGTGGGACAAAGGCAGGAAGAAAGTAACGGAGAGCCTGGGGAGACA
		2072	684	194	722	472	1	1	1	1	1
rs251934	GRCh38-Chr5:175351637-175351691 rs251934-A	1413	519	153	426	315	0.68195	0.758772	0.78866	0.590028	0.667373	GTCTGGGGCAGATGAAGTAGTAGATATCTGGCTGTCCCATCTACTTAAAAGCCTC
rs251934	GRCh38-Chr5:175351637-175351691 rs251934-G	658	165	41	295	157	0.317568	0.241228	0.21134	0.408587	0.332627	GTCTGGGGCAGATGAAGTAGTAGATATCTGGCTGTCCCGTCTACTTAAAAGCCTC
rs251934	GRCh38-Chr5:175351637-175351691 rs951976525-T; rs251934-G	1	0	0	1	0	0.000482625	0	0	0.00138504	0	GTCTGGGGCAGATGAAGTAGTAGATATCTGGCTGTCCTGTCTACTTAAAAGCCTC
		2072	684	194	722	472	1	1	1	1	1
rs338882	GRCh38-Chr5:179263618-179263733 rs338882-A	1042	352	111	363	216	0.503868	0.516129	0.572165	0.504167	0.457627	CGTGGCGCAGCCCACACCTCACGGCAAGCCCCAGCCAAAGGGACCAAGTCAAGAGCTCTGAGAGACATCCCAGCCGAAGAATCCAGCCCTTGTCCCAAACGTGTGTATGCACAGGC
rs338882	GRCh38-Chr5:179263618-179263733 rs338882-G	1024	328	83	357	256	0.495164	0.480938	0.427835	0.495833	0.542373	CGTGGCGCAGCCCACACCTCACGGCAAGCCCCAGCCAAAGGGACCAAGTCAAGAGCTCTGAGAGACATCCCAGCCGAAGAATCCAGCCCTTGTCCCAAACGTGTGTGTGCACAGGC
rs338882	GRCh38-Chr5:179263618-179263733 rs533412053-A; rs338882-A	2	2	0	0	0	0.000967118	0.00293255	0	0	0	CATGGCGCAGCCCACACCTCACGGCAAGCCCCAGCCAAAGGGACCAAGTCAAGAGCTCTGAGAGACATCCCAGCCGAAGAATCCAGCCCTTGTCCCAAACGTGTGTATGCACAGGC
	*	2068	682	194	720	472	1	1	1	1	1
rs13218440	GRCh38-Chr6:12059715-12059838 rs13218440-G	1267	412	123	449	283	0.612077	0.604106	0.634021	0.621884	0.599576	CCTCTGGGCAGCCTCCTGGAATACTCAGCTGGGATGGGTTGGGGCTGCTTGAGGTACAGCTCCCACTGCCTCTGAGTGGCCCTCCATGAAAATGCCTCATGTCTCTGTGTCCCTAAACTGTAGG
rs13218440	GRCh38-Chr6:12059715-12059838 rs13218440-A	793	262	70	273	188	0.383092	0.384164	0.360825	0.378116	0.398305	CCTCTGAGCAGCCTCCTGGAATACTCAGCTGGGATGGGTTGGGGCTGCTTGAGGTACAGCTCCCACTGCCTCTGAGTGGCCCTCCATGAAAATGCCTCATGTCTCTGTGTCCCTAAACTGTAGG
rs13218440	GRCh38-Chr6:12059715-12059838 rs13218440-G; rs1011515-A	9	8	0	0	1	0.00434783	0.0117302	0	0	0.00211864	CCTCTGGGCAGCCTCCTGGAATACTCAGCTGGGATGGGTTGGGGCTGCTTGAGGTACAGCTCCCACTGCCTCTGAGTGGCCCTCCATGAAAATGCCTCAAGTCTCTGTGTCCCTAAACTGTAGG
rs13218440	GRCh38-Chr6:12059715-12059838 rs13218440-G; ss5982134728-T	1	0	1	0	0	0.000483092	0	0.00515464	0	0	CCTCTGGGCAGCCTCCTGGAATACTCAGCTGGGATGGGTTGGGGCTGCTTGAGGTACAGCTCCCACTGCCTCTGAGTGGCCCTCCATGAAAATGCCTCATGTCTCTGTGTCCCTAAACTTTAGG
	*	2070	682	194	722	472	1	1	1	1	1
rs1336071	GRCh38-Chr6:93827491-93827549 rs1336071-C	1036	303	118	382	233	0.501938	0.442982	0.608247	0.535014	0.493644	CTGTTTTGTCCATCTGAAATTCTAATTTTTCTTATCTTTGTTTTAACCTGATGCTTTTT
rs1336071	GRCh38-Chr6:93827491-93827549 rs1336071-T	899	277	74	314	234	0.435562	0.404971	0.381443	0.439776	0.495763	CTGTTTTGTCCATCTGAAATTCTAATTTTTCTTATCTTTGTTTTAATCTGATGCTTTTT
rs1336071	GRCh38-Chr6:93827491-93827549 rs73756355-T; rs1336071-C	110	102	0	3	5	0.0532946	0.149123	0	0.00420168	0.0105932	CTGTTTTGTCCATCTGAAATTCTATTTTTTCTTATCTTTGTTTTAACCTGATGCTTTTT
rs1336071	GRCh38-Chr6:93827491-93827549 rs201142044-INS_T; rs1336071-C	16	1	0	15	0	0.00775194	0.00146199	0	0.0210084	0	CTGTTTTGTCCATCTGAAATTCTAATTTTTTCTTATCTTTGTTTTAACCTGATGCTTTTT
rs1336071	GRCh38-Chr6:93827491-93827549 rs540177118-DEL_CT; rs1336071-C	2	0	2	0	0	0.000968992	0	0.0103093	0	0	GTTTTGTCCATCTGAAATTCTAATTTTTCTTATCTTTGTTTTAACCTGATGCTTTTT
rs1336071	GRCh38-Chr6:93827491-93827549 rs1336071-T; rs569461464-A	1	1	0	0	0	0.000484496	0.00146199	0	0	0	CTGTTTTGTCCATCTGAAATTCTAATTTTTCTTATCTTTGTTTTAATCTGATGATTTTT
	*	2064	684	194	714	472	1	1	1	1	1
rs214955	GRCh38-Chr6:152376519-152376590 rs214955-C	1042	318	76	392	256	0.502896	0.464912	0.391753	0.542936	0.542373	TTCTTTATTCTGGCAGCCCTTGGATGCTTGCAAACAAAGACTGAAAAGGTGACGCAAAAATTTAATGGCAGG
rs214955	GRCh38-Chr6:152376519-152376590 rs214955-T	1008	361	118	319	210	0.486486	0.527778	0.608247	0.441828	0.444915	TTCTTTATTCTGGCAGCCCTTGGATGCTTGCAAACAAAGACTGAAAAGGTGATGCAAAAATTTAATGGCAGG
rs214955	GRCh38-Chr6:152376519-152376590 rs117020413-T; rs214955-T	20	5	0	9	6	0.00965251	0.00730994	0	0.0124654	0.0127119	TTCTTTATTCTGGCAGCCCTTTGATGCTTGCAAACAAAGACTGAAAAGGTGATGCAAAAATTTAATGGCAGG
rs214955	GRCh38-Chr6:152376519-152376590 rs117360770-C; rs214955-T	2	0	0	2	0	0.000965251	0	0	0.00277008	0	TTCTTTATTCTGGCAGCCCTTGGATGCTTGCAAACAAACACTGAAAAGGTGATGCAAAAATTTAATGGCAGG
		2072	684	194	722	472	1	1	1	1	1
rs727811	GRCh38-Chr6:164624247-164624311 rs1390470-T; rs727811-G	1115	485	56	331	243	0.538127	0.709064	0.28866	0.458449	0.514831	AGCAAAAATATAAAGTGAATGAAATCATGAGATTGCTGGGAGATGCAGATGATTGTAAGTCGTTG
rs727811	GRCh38-Chr6:164624247-164624311 rs1390470-T; rs727811-T	938	191	138	390	219	0.452703	0.27924	0.71134	0.540166	0.463983	AGCAAAAATATAAAGTGAATGAAATCATGAGATTGCTGGGAGATGCAGATGATTTTAAGTCGTTG
rs727811	GRCh38-Chr6:164624247-164624311 rs727811-G	19	8	0	1	10	0.00916988	0.0116959	0	0.00138504	0.0211864	AGCAAAAATACAAAGTGAATGAAATCATGAGATTGCTGGGAGATGCAGATGATTGTAAGTCGTTG
		2072	684	194	722	472	1	1	1	1	1
rs6955448	GRCh38-Chr7:4270677-4270749 rs6955448-C	1408	446	142	482	338	0.680193	0.652047	0.731959	0.669444	0.716102	TAAGTTGGGATAGGTGATGCAAAGCCCTGCCGTTACTACTATTGTTGAAAAGTTCACGGGAGAAAGTTGTAAA
rs6955448	GRCh38-Chr7:4270677-4270749 rs6950322-A; rs6955448-T	647	223	52	238	134	0.31256	0.326023	0.268041	0.330556	0.283898	TAAGTTGGAATAGGTGATGCAAAGCCCTGCCGTTACTACTATTGTTGAAAAGTTCATGGGAGAAAGTTGTAAA
rs6955448	GRCh38-Chr7:4270677-4270749 rs143117431-G; rs6955448-C	8	8	0	0	0	0.00386473	0.0116959	0	0	0	TAAGTTGGGATAGGTGATGCAAAGCCCTGCCGTTACTACTGTTGTTGAAAAGTTCACGGGAGAAAGTTGTAAA
rs6955448	GRCh38-Chr7:4270677-4270749 rs140855431-T; rs6955448-C	5	5	0	0	0	0.00241546	0.00730994	0	0	0	TAAGTTGGGATAGGTGATTCAAAGCCCTGCCGTTACTACTATTGTTGAAAAGTTCACGGGAGAAAGTTGTAAA
rs6955448	GRCh38-Chr7:4270677-4270749 rs6950322-A; rs6955448-C	2	2	0	0	0	0.000966184	0.00292398	0	0	0	TAAGTTGGAATAGGTGATGCAAAGCCCTGCCGTTACTACTATTGTTGAAAAGTTCACGGGAGAAAGTTGTAAA
	*	2070	684	194	720	472	1	1	1	1	1
rs917118	GRCh38-Chr7:4417342-4417409 rs917118-C	1195	239	134	530	292	0.576737	0.349415	0.690722	0.734072	0.618644	CCATGAAGATGGAGTCAACATTTTACAAGACGCTCGTTGACCTCAGTCATCTCTTACCACTTGTGCTC
rs917118	GRCh38-Chr7:4417342-4417409 rs917118-T	877	445	60	192	180	0.423263	0.650585	0.309278	0.265928	0.381356	CCATGAAGATGGAGTCAACATTTTACAAGATGCTCGTTGACCTCAGTCATCTCTTACCACTTGTGCTC
		2072	684	194	722	472	1	1	1	1	1
rs321198	GRCh38-Chr7:137344994-137345108 rs321198-C	1191	387	109	430	265	0.578155	0.567449	0.561856	0.600559	0.566239	ATACAATTCTCAAATGAAATAACTAAATAAGGAAGCTGTGTTCCTTTCTCCTACACACAGGCTTCAGGTTACCTGTTTTCCTTTTGTGATTCCACTTCCGTGTGAAGCAAGCAGT
rs321198	GRCh38-Chr7:137344994-137345108 rs321198-T	858	294	85	279	200	0.416505	0.431085	0.438144	0.389665	0.42735	ATACAATTCTCAAATGAAATAACTAAATAAGGAAGCTGTGTTCCTTTCTCCTACACACAGGCTTCAGGTTACCTGTTTTCCTTTTGTGATTCCACTTCTGTGTGAAGCAAGCAGT
rs321198	GRCh38-Chr7:137344994-137345108 rs321198-T; rs186446125-C	10	0	0	7	3	0.00485437	0	0	0.00977654	0.00641026	ATACAATTCTCAAATGAAATAACTAAATAAGGAAGCTGTGTTCCTTTCTCCTACACACAGGCTTCAGGTTACCTGTTTTCCTTTTGTGATTCCACTTCTGCGTGAAGCAAGCAGT
rs321198	GRCh38-Chr7:137344994-137345108 rs147098090-C; rs321198-T	1	1	0	0	0	0.000485437	0.00146628	0	0	0	ATACAATTCTCAAATGAAATAACTAAATAAGGAAGCTGTGTTCCTTTCTCCTACACACAGGCTTCAGGTTACCTGTTTTCCTTTTGTGACTCCACTTCTGTGTGAAGCAAGCAGT
	*	2060	682	194	716	468	1	1	1	1	1
rs737681	GRCh38-Chr7:156198068-156198147 rs737681-C	1266	343	151	443	329	0.611004	0.501462	0.778351	0.613573	0.697034	CCGCGGGAGCTCTGCACAAGCCGCAGGGTCACATGTGAGGCCATCTCCACCCTCATCCCTGGGCCCAGGTGCAGTCTCTC
rs737681	GRCh38-Chr7:156198068-156198147 rs737681-T	795	331	43	279	142	0.383687	0.483918	0.221649	0.386427	0.300847	CCGCGGGAGCTCTGCACAAGCCGCAGGGTCACATGTGAGGCCATCTCCACCTTCATCCCTGGGCCCAGGTGCAGTCTCTC
rs737681	GRCh38-Chr7:156198068-156198147 rs553538445-C; rs737681-C	7	6	0	0	1	0.00337838	0.00877193	0	0	0.00211864	CCGCGGGAGCTCTGCACAAGCCGCACGGTCACATGTGAGGCCATCTCCACCCTCATCCCTGGGCCCAGGTGCAGTCTCTC
rs737681	GRCh38-Chr7:156198068-156198147 rs78066350-T; rs737681-T	4	4	0	0	0	0.0019305	0.00584795	0	0	0	CCGCGGGAGCTCTGCACAAGCCGCAGGGTCACATGTGAGGCCATCTTCACCTTCATCCCTGGGCCCAGGTGCAGTCTCTC
		2072	684	194	722	472	1	1	1	1	1
rs763869	GRCh38-Chr8:1427433-1427467 rs763869-A	1102	328	138	346	290	0.531853	0.479532	0.71134	0.479224	0.614407	AATGTAATGCAATTGAGTTAGAAATAATATAAACA
rs763869	GRCh38-Chr8:1427433-1427467 rs763869-G	969	355	56	376	182	0.467664	0.519006	0.28866	0.520776	0.385593	AATGTAATGCAGTTGAGTTAGAAATAATATAAACA
rs763869	GRCh38-Chr8:1427433-1427467 rs763869-A; rs1027299221-G	1	1	0	0	0	0.000482625	0.00146199	0	0	0	AATGTAATGCAATTGAGTTAGAAATAATGTAAACA
		2072	684	194	722	472	1	1	1	1	1
rs10092491	GRCh38-Chr8:28553546-28553610 rs10092491-C	1188	392	117	396	283	0.573359	0.573099	0.603093	0.548476	0.599576	AAACTGAAGCTTTCCTTATAGAGATTTATCCTAGTTAGTTTGCGGGGATACTGGTTGGGCCGAAA
rs10092491	GRCh38-Chr8:28553546-28553610 rs10092491-T	881	289	77	326	189	0.425193	0.422515	0.396907	0.451524	0.400424	AAACTGAAGTTTTCCTTATAGAGATTTATCCTAGTTAGTTTGCGGGGATACTGGTTGGGCCGAAA
rs10092491	GRCh38-Chr8:28553546-28553610 rs10092491-T; rs972721450-T	2	2	0	0	0	0.000965251	0.00292398	0	0	0	AAACTGAAGTTTTCCTTATAGAGATTTATCCTAGTTAGTTTGTGGGGATACTGGTTGGGCCGAAA
rs10092491	GRCh38-Chr8:28553546-28553610 rs10092491-C; rs1306110296-DEL_T	1	1	0	0	0	0.000482625	0.00146199	0	0	0	AAACTGAAGCTTCCTTATAGAGATTTATCCTAGTTAGTTTGCGGGGATACTGGTTGGGCCGAAA
		2072	684	194	722	472	1	1	1	1	1
rs2056277	GRCh38-Chr8:138386821-138386877 rs2056277-C	1663	583	170	539	371	0.802606	0.852339	0.876289	0.746537	0.786017	AAGCATGTGTCAACCGCCAAACTGGGTGTTAGGGAGACAGGCATGAATGAGACGGGA
rs2056277	GRCh38-Chr8:138386821-138386877 rs2056277-T	389	94	24	174	97	0.187741	0.137427	0.123711	0.240997	0.205508	AAGCATGTGTCAACCGCCAAACTGGGTGTTAGGGAGACAGGCATGAATGAGATGGGA
rs2056277	GRCh38-Chr8:138386821-138386877 rs149318691-T; rs2056277-C	15	2	0	9	4	0.00723938	0.00292398	0	0.0124654	0.00847458	AAGCATGTGTCAACTGCCAAACTGGGTGTTAGGGAGACAGGCATGAATGAGACGGGA
rs2056277	GRCh38-Chr8:138386821-138386877 rs112839113-C; rs2056277-C	4	4	0	0	0	0.0019305	0.00584795	0	0	0	AAGCATGTGCCAACCGCCAAACTGGGTGTTAGGGAGACAGGCATGAATGAGACGGGA
rs2056277	GRCh38-Chr8:138386821-138386877 rs2056277-C; rs539552840-A	1	1	0	0	0	0.000482625	0.00146199	0	0	0	AAGCATGTGTCAACCGCCAAACTGGGTGTTAGGGAGACAGGCATGAATGAGACAGGA
		2072	684	194	722	472	1	1	1	1	1
rs4606077	GRCh38-Chr8:143574562-143574669 rs4606077-C; rs1869434-A	1413	384	140	554	335	0.68195	0.561404	0.721649	0.767313	0.709746	TGGGATCTGACTCCCCACAGCCCACCCAAAGCCAGGGAACTCCTCACTGCCCTTCGGGCTTCAGCACAGGGCTGTCTCCCACGCCGGCAGGGCCTGTGCTTTCACTGG
rs4606077	GRCh38-Chr8:143574562-143574669 rs4606077-T	505	264	24	111	106	0.243726	0.385965	0.123711	0.15374	0.224576	TGGGATCTGACTCCCCACAGCCTACCCAAAGCCGGGGAACTCCTCACTGCCCTTCGGGCTTCAGCACAGGGCTGTCTCCCACGCCGGCAGGGCCTGTGCTTTCACTGG
rs4606077	GRCh38-Chr8:143574562-143574669 rs4606077-T; rs58774517-T	141	30	30	54	27	0.0680502	0.0438596	0.154639	0.0747922	0.0572034	TGGGATCTGACTCCCCACAGCCTACCCAAAGCTGGGGAACTCCTCACTGCCCTTCGGGCTTCAGCACAGGGCTGTCTCCCACGCCGGCAGGGCCTGTGCTTTCACTGG
rs4606077	GRCh38-Chr8:143574562-143574669 rs4606077-C	7	6	0	0	1	0.00337838	0.00877193	0	0	0.00211864	TGGGATCTGACTCCCCACAGCCCACCCAAAGCCGGGGAACTCCTCACTGCCCTTCGGGCTTCAGCACAGGGCTGTCTCCCACGCCGGCAGGGCCTGTGCTTTCACTGG
rs4606077	GRCh38-Chr8:143574562-143574669 rs72691478-G; rs4606077-C; rs1869434-A	6	0	0	3	3	0.00289575	0	0	0.00415512	0.00635593	GGGGATCTGACTCCCCACAGCCCACCCAAAGCCAGGGAACTCCTCACTGCCCTTCGGGCTTCAGCACAGGGCTGTCTCCCACGCCGGCAGGGCCTGTGCTTTCACTGG
		2072	684	194	722	472	1	1	1	1	1
rs1015250	GRCh38-Chr9:1823726-1823793 rs1015250-G	1277	249	101	575	352	0.616908	0.364035	0.520619	0.798611	0.745763	AAAGGTTACTAAGTGATGGAGTTAGGAAAAGAACCCAGGTGTTTTATTGCTGTCCCAGTGATTTTTCA
rs1015250	GRCh38-Chr9:1823726-1823793 rs6475200-G; rs1015250-C	684	410	89	84	101	0.330435	0.599415	0.458763	0.116667	0.213983	AAAGGTTACTAAGTGATGGAGTTGGGAAAAGAACCCAGGTGTTTTATTCCTGTCCCAGTGATTTTTCA
rs1015250	GRCh38-Chr9:1823726-1823793 rs1015250-C	108	25	4	61	18	0.0521739	0.0365497	0.0206186	0.0847222	0.0381356	AAAGGTTACTAAGTGATGGAGTTAGGAAAAGAACCCAGGTGTTTTATTCCTGTCCCAGTGATTTTTCA
rs1015250	GRCh38-Chr9:1823726-1823793 rs6475200-G; rs1015250-G	1	0	0	0	1	0.000483092	0	0	0	0.00211864	AAAGGTTACTAAGTGATGGAGTTGGGAAAAGAACCCAGGTGTTTTATTGCTGTCCCAGTGATTTTTCA
	*	2070	684	194	720	472	1	1	1	1	1
rs7041158	GRCh38-Chr9:27985930-27986001 rs7041158-C	1242	419	129	427	267	0.637577	0.634848	0.701087	0.648936	0.598655	TCAATTTCCTCTCCAACCCAAGACACTTCTCACTGGAAAACTCTCACAATCACATTTATAACAAAGGAGAGG
rs7041158	GRCh38-Chr9:27985930-27986001 rs7041158-T	693	239	54	222	178	0.355749	0.362121	0.293478	0.337386	0.399103	TCAATTTCCTTTCCAACCCAAGACACTTCTCACTGGAAAACTCTCACAATCACATTTATAACAAAGGAGAGG
rs7041158	GRCh38-Chr9:27985930-27986001 rs7041158-T; rs117776421-G	11	1	0	9	1	0.00564682	0.00151515	0	0.0136778	0.00224215	TCAATTTCCTTTCCAACCCAAGACACTTCTCACTGGAAAACTCTCACAGTCACATTTATAACAAAGGAGAGG
rs7041158	GRCh38-Chr9:27985930-27986001 rs7041158-C; ss5982134729-G	1	0	1	0	0	0.000513347	0	0.00543478	0	0	TCAATTTCCTCTCCAACCGAAGACACTTCTCACTGGAAAACTCTCACAATCACATTTATAACAAAGGAGAGG
rs7041158	GRCh38-Chr9:27985930-27986001 rs7041158-T; rs1041998661-G	1	1	0	0	0	0.000513347	0.00151515	0	0	0	TCAATTTCCTTTCCAACGCAAGACACTTCTCACTGGAAAACTCTCACAATCACATTTATAACAAAGGAGAGG
	*	1948	660	184	658	446	1	1	1	1	1
rs1463729	GRCh38-Chr9:124119138-124119195 rs1463729-T	1248	466	77	441	264	0.602317	0.681287	0.396907	0.610803	0.559322	ATGTGCATGCTTTTGGGTGGGAATGGCTGCATGTGGCTATGAGTGTATGCTGCCAAAG
rs1463729	GRCh38-Chr9:124119138-124119195 rs1463729-C	770	172	117	281	200	0.371622	0.251462	0.603093	0.389197	0.423729	ATGTGCATGCTTTTGGGTGGGAATGGCTGCACGTGGCTATGAGTGTATGCTGCCAAAG
rs1463729	GRCh38-Chr9:124119138-124119195 rs114709250-G; rs1463729-T	53	45	0	0	8	0.0255792	0.0657895	0	0	0.0169492	ATGTGCGTGCTTTTGGGTGGGAATGGCTGCATGTGGCTATGAGTGTATGCTGCCAAAG
rs1463729	GRCh38-Chr9:124119138-124119195 ss5982134730-T; rs1463729-T	1	1	0	0	0	0.000482625	0.00146199	0	0	0	ATGTGCATGTTTTTGGGTGGGAATGGCTGCATGTGGCTATGAGTGTATGCTGCCAAAG
		2072	684	194	722	472	1	1	1	1	1
rs1360288	GRCh38-Chr9:126205735-126205813 rs1360288-C	1452	502	119	486	345	0.700772	0.733918	0.613402	0.67313	0.730932	GGGGAGAGGCTCCCTGCAGCCTCTGGGGAGTAGAGGAGACCTGGGAAGACACTGGCTGCATCCCCTCAACAGATGCCCC
rs1360288	GRCh38-Chr9:126205735-126205813 rs1360288-T	599	164	75	236	124	0.289093	0.239766	0.386598	0.32687	0.262712	GGGGAGAGGCTCCCTGCAGCCTCTGGGGAGTAGAGGAGACCTGGGAAGATACTGGCTGCATCCCCTCAACAGATGCCCC
rs1360288	GRCh38-Chr9:126205735-126205813 rs116412791-T; rs1360288-C	20	18	0	0	2	0.00965251	0.0263158	0	0	0.00423729	GGGTAGAGGCTCCCTGCAGCCTCTGGGGAGTAGAGGAGACCTGGGAAGACACTGGCTGCATCCCCTCAACAGATGCCCC
rs1360288	GRCh38-Chr9:126205735-126205813 rs1360288-T; rs1831069712-A	1	0	0	0	1	0.000482625	0	0	0	0.00211864	GGGGAGAGGCTCCCTGCAGCCTCTGGGGAGTAGAGGAGACCTGGGAAGATACTGACTGCATCCCCTCAACAGATGCCCC
		2072	684	194	722	472	1	1	1	1	1
rs10776839	GRCh38-Chr9:134525445-134525507 rs7037930-G; rs10776839-T	844	245	78	311	210	0.407729	0.359238	0.402062	0.430748	0.444915	CAGCTGAGGAGCCCGAGTTTGCCGTCAGATCAGAGCCCCAGTTGCCCGGTCTGCCGCAGCTCT
rs10776839	GRCh38-Chr9:134525445-134525507 rs7037930-G; rs10776839-G	710	279	78	213	140	0.342995	0.409091	0.402062	0.295014	0.29661	CAGCTGAGGAGCCCGAGGTTGCCGTCAGATCAGAGCCCCAGTTGCCCGGTCTGCCGCAGCTCT
rs10776839	GRCh38-Chr9:134525445-134525507 rs10776839-G	516	158	38	198	122	0.249275	0.231672	0.195876	0.274238	0.258475	CAGCTGAGGAGCCCAAGGTTGCCGTCAGATCAGAGCCCCAGTTGCCCGGTCTGCCGCAGCTCT
	*	2070	682	194	722	472	1	1	1	1	1
rs826472	GRCh38-Chr10:2364342-2364443 rs826472-C	1480	562	154	418	346	0.714286	0.821637	0.793814	0.578947	0.733051	TAGCATTTTTATGCATCAATAAGATGTTAATTATGATCAGATATTTTACAATGATGCTGAATTTTGTCTCTGTTATATTAGTCACCTATCTCTCACCAGGAT
rs826472	GRCh38-Chr10:2364342-2364443 rs826472-T	571	120	39	290	122	0.275579	0.175439	0.201031	0.401662	0.258475	TAGCATTTTTATGCATCAATAAGATGTTAATTATGATCAGATATTTTACAATGATGCTGAATTTTGTCTCTGTTATATTAGTCACCTATCTCTCATCAGGAT
rs826472	GRCh38-Chr10:2364342-2364443 rs138540224-C; rs826472-C	21	2	1	14	4	0.0101351	0.00292398	0.00515464	0.0193906	0.00847458	TAGCATTTTTATGCATCAATAAGATGTTAATTATGATCAGATATTTTACAATGATGCTGAATTTTGTCTCTGTTATATTAGCCACCTATCTCTCACCAGGAT
		2072	684	194	722	472	1	1	1	1	1
rs735155	GRCh38-Chr10:3331961-3332088 rs735155-C	1030	380	44	381	225	0.497104	0.555556	0.226804	0.527701	0.476695	GAGTGTCACCGAATTCAACGGGAAGCCAGCAGGTCTCCCTCTCCAGCGCGGCCCAGCAGGCCTCTCCCGACCCTTCAGCGCCAGCTCTCCGGTTTTCTCCAGGTTAGGTCCCTTCTGGAGCCGGCGTC
rs735155	GRCh38-Chr10:3331961-3332088 rs735155-T	931	207	150	340	234	0.449324	0.302632	0.773196	0.470914	0.495763	GAGTGTCACCGAATTCAACGGGAAGTCAGCAGGTCTCCCTCTCCAGCGCGGCCCAGCAGGCCTCTCCCGACCCTTCAGCGCCAGCTCTCCGGTTTTCTCCAGGTTAGGTCCCTTCTGGAGCCGGCGTC
rs735155	GRCh38-Chr10:3331961-3332088 rs7905965-T; rs735155-C	80	70	0	0	10	0.03861	0.102339	0	0	0.0211864	GTGTGTCACCGAATTCAACGGGAAGCCAGCAGGTCTCCCTCTCCAGCGCGGCCCAGCAGGCCTCTCCCGACCCTTCAGCGCCAGCTCTCCGGTTTTCTCCAGGTTAGGTCCCTTCTGGAGCCGGCGTC
rs735155	GRCh38-Chr10:3331961-3332088 rs735155-C; rs79799511-T	19	17	0	0	2	0.00916988	0.0248538	0	0	0.00423729	GAGTGTCACCGAATTCAACGGGAAGCCAGCAGGTCTCCCTCTCCAGTGCGGCCCAGCAGGCCTCTCCCGACCCTTCAGCGCCAGCTCTCCGGTTTTCTCCAGGTTAGGTCCCTTCTGGAGCCGGCGTC
rs735155	GRCh38-Chr10:3331961-3332088 rs373487413-C; rs735155-C	9	8	0	0	1	0.00434363	0.0116959	0	0	0.00211864	GAGCGTCACCGAATTCAACGGGAAGCCAGCAGGTCTCCCTCTCCAGCGCGGCCCAGCAGGCCTCTCCCGACCCTTCAGCGCCAGCTCTCCGGTTTTCTCCAGGTTAGGTCCCTTCTGGAGCCGGCGTC
rs735155	GRCh38-Chr10:3331961-3332088 rs7905965-T; rs735155-C; rs79799511-T	2	2	0	0	0	0.000965251	0.00292398	0	0	0	GTGTGTCACCGAATTCAACGGGAAGCCAGCAGGTCTCCCTCTCCAGTGCGGCCCAGCAGGCCTCTCCCGACCCTTCAGCGCCAGCTCTCCGGTTTTCTCCAGGTTAGGTCCCTTCTGGAGCCGGCGTC
rs735155	GRCh38-Chr10:3331961-3332088 rs735155-C; rs1446241405-G	1	0	0	1	0	0.000482625	0	0	0.00138504	0	GAGTGTCACCGAATTCAACGGGAAGCCAGCAGGTCTCCCTCTCCAGCGCGGCCCAGCAGGCCTCTCCCGACCCTTCAGCGCCAGCTCTCCGGTTTTCTCCAGGTGAGGTCCCTTCTGGAGCCGGCGTC
		2072	684	194	722	472	1	1	1	1	1
rs3780962	GRCh38-Chr10:17151313-17151354 rs3780962-G	1038	346	98	385	209	0.501449	0.505848	0.505155	0.534722	0.442797	GATGAACAAGGTCAAGATATCAGCTTTCACCCGTGAGGACAG
rs3780962	GRCh38-Chr10:17151313-17151354 rs3780962-A	1032	338	96	335	263	0.498551	0.494152	0.494845	0.465278	0.557203	GATGAACAAGGTCAAGATATCAGCTTTCACCCGTAAGGACAG
	*	2070	684	194	720	472	1	1	1	1	1
rs740598	GRCh38-Chr10:116747355-116747426 rs740598-A	1302	403	138	469	292	0.628378	0.589181	0.71134	0.649584	0.618644	TCAAATAGCAATGGCTCGTCTATGGTTAGTCTCACAGCCACATTCTCAGAACTGCTCAAACCCTGGCCCTGC
rs740598	GRCh38-Chr10:116747355-116747426 rs740598-G	758	274	56	250	178	0.36583	0.400585	0.28866	0.34626	0.377119	TCAAATAGCAATGGCTCGTCTATGGTTAGTCTCGCAGCCACATTCTCAGAACTGCTCAAACCCTGGCCCTGC
rs740598	GRCh38-Chr10:116747355-116747426 rs740598-A; rs189367495-T	7	2	0	3	2	0.00337838	0.00292398	0	0.00415512	0.00423729	TCAAATAGCAATGGCTCGTCTATGGTTAGTCTCACAGCCACATTTTCAGAACTGCTCAAACCCTGGCCCTGC
rs740598	GRCh38-Chr10:116747355-116747426 rs151017734-A; rs740598-G	3	3	0	0	0	0.00144788	0.00438596	0	0	0	TCAAATAGCAATGGCTCATCTATGGTTAGTCTCGCAGCCACATTCTCAGAACTGCTCAAACCCTGGCCCTGC
rs740598	GRCh38-Chr10:116747355-116747426 rs1472107559-G; rs740598-A	2	2	0	0	0	0.000965251	0.00292398	0	0	0	TCAAATAGCAATGGCTCGTCTGTGGTTAGTCTCACAGCCACATTCTCAGAACTGCTCAAACCCTGGCCCTGC
		2072	684	194	722	472	1	1	1	1	1
rs964681	GRCh38-Chr10:130900152-130900208 rs964681-T	1338	494	134	399	311	0.645753	0.722222	0.690722	0.552632	0.658898	GACATGGGCATTTGGGGCCACAGTGCTCAGACAGCAACCTCTGGTTCTTACCAATCC
rs964681	GRCh38-Chr10:130900152-130900208 rs964681-C	732	189	60	323	160	0.353282	0.276316	0.309278	0.447368	0.338983	GACACGGGCATTTGGGGCCACAGTGCTCAGACAGCAACCTCTGGTTCTTACCAATCC
rs964681	GRCh38-Chr10:130900152-130900208 rs576924750-A rs964681-C	1	0	0	0	1	0.000482625	0	0	0	0.00211864	AACACGGGCATTTGGGGCCACAGTGCTCAGACAGCAACCTCTGGTTCTTACCAATCC
rs964681	GRCh38-Chr10:130900152-130900208 rs964681-C; rs929883578-T	1	1	0	0	0	0.000482625	0.00146199	0	0	0	GACACGGGCATTTGGGGCCATAGTGCTCAGACAGCAACCTCTGGTTCTTACCAATCC
		2072	684	194	722	472	1	1	1	1	1
rs1498553	GRCh38-Chr11:5687776-5687839 rs1498553-T	1083	372	100	372	239	0.522683	0.54386	0.515464	0.515235	0.506356	ACTTCAGATGTTCAAAGCCAGATGAGAATAAAAGGATGGCTATGAGATCTATGGAAGTGCTGAG
rs1498553	GRCh38-Chr11:5687776-5687839 rs1498553-C	989	312	94	350	233	0.477317	0.45614	0.484536	0.484765	0.493644	ACTTCAGATGTTCAAAGCCAGACGAGAATAAAAGGATGGCTATGAGATCTATGGAAGTGCTGAG
		2072	684	194	722	472	1	1	1	1	1
rs901398	GRCh38-Chr11:11074649-11074693 rs901398-T	1343	427	119	495	302	0.648166	0.624269	0.613402	0.685596	0.639831	GTGCAAACTAGCTGAATATCAGCCCTGTTGATAGCTAACATTAGT
rs901398	GRCh38-Chr11:11074649-11074693 rs901398-C	729	257	75	227	170	0.351834	0.375731	0.386598	0.314404	0.360169	GTGCAAACTAGCTGAATATCAGCCCCGTTGATAGCTAACATTAGT
		2072	684	194	722	472	1	1	1	1	1
rs10488710	GRCh38-Chr11:115336442-115336505 rs10488710-G	1273	388	126	468	291	0.618562	0.570588	0.649485	0.655462	0.619149	TAAAAATAAAACCGAGTGCCACATTTGCAGAAAAAGAACAAGTGGGAACTCCTAATACAGTAAA
rs10488710	GRCh38-Chr11:115336442-115336505 rs10488710-C	785	292	68	246	179	0.381438	0.429412	0.350515	0.344538	0.380851	TAAAAATAAAACCGACTGCCACATTTGCAGAAAAAGAACAAGTGGGAACTCCTAATACAGTAAA
	*	2058	680	194	714	470	1	1	1	1	1
rs2076848	GRCh38-Chr11:134797628-134797704 rs2076848-A	1150	344	113	407	286	0.555019	0.502924	0.582474	0.563712	0.605932	CCCGGGACCGCTTCAGGTCCATCAAGCCCTGATTTCTGGTGGTGAGGCCAGGATACCTGTGTATTATCAATAATTTC
rs2076848	GRCh38-Chr11:134797628-134797704 rs2076848-T	681	140	72	310	159	0.328668	0.204678	0.371134	0.429363	0.336864	CCCGGGACCGCTTCAGGTCCATCATGCCCTGATTTCTGGTGGTGAGGCCAGGATACCTGTGTATTATCAATAATTTC
rs2076848	GRCh38-Chr11:134797628-134797704 rs7947725-T; rs2076848-A	233	194	8	5	26	0.112452	0.283626	0.0412371	0.00692521	0.0550847	CCTGGGACCGCTTCAGGTCCATCAAGCCCTGATTTCTGGTGGTGAGGCCAGGATACCTGTGTATTATCAATAATTTC
rs2076848	GRCh38-Chr11:134797628-134797704 rs7947725-T; rs2076848-T	7	6	0	0	1	0.00337838	0.00877193	0	0	0.00211864	CCTGGGACCGCTTCAGGTCCATCATGCCCTGATTTCTGGTGGTGAGGCCAGGATACCTGTGTATTATCAATAATTTC
rs2076848	GRCh38-Chr11:134797628-134797704 rs2076848-T; rs1397453471-INS_T	1	0	1	0	0	0.000482625	0	0.00515464	0	0	CCCGGGACCGCTTCAGGTCCATCATGCCCTGATTTCTGGTGGTGAGGCCAGGATACCTGTGTATTATCAATTAATTTC
		2072	684	194	722	472	1	1	1	1	1
rs2107612	GRCh38-Chr12:779120-779169 rs2107612-A	1457	434	170	511	342	0.703185	0.634503	0.876289	0.707756	0.724576	ACTAATTATGTGTTTTTTCTAAATCATATTGTCTACTTTTCTCCAAAACA
rs2107612	GRCh38-Chr12:779120-779169 rs2107612-G	614	249	24	211	130	0.296332	0.364035	0.123711	0.292244	0.275424	ACTAATTATGTGTTTTTTCTAAATCATATTGTCTGCTTTTCTCCAAAACA
rs2107612	GRCh38-Chr12:779120-779169 rs2107612-A; rs1943423860-T	1	1	0	0	0	0.000482625	0.00146199	0	0	0	ACTAATTATGTGTTTTTTCTAAATCATATTGTCTACTTTTCTCCATAACA
		2072	684	194	722	472	1	1	1	1	1
rs2269355	GRCh38-Chr12:6836737-6836759 rs2269355-C	1094	344	84	406	260	0.527992	0.502924	0.43299	0.562327	0.550847	TCCCGAGTTCTCTCCACAGTCCC
rs2269355	GRCh38-Chr12:6836737-6836759 rs2269355-G	977	339	110	316	212	0.471525	0.495614	0.56701	0.437673	0.449153	TCCCGAGTTCTCTGCACAGTCCC
rs2269355	GRCh38-Chr12:6836737-6836759 rs770405898-T; rs2269355-C	1	1	0	0	0	0.000482625	0.00146199	0	0	0	TCCTGAGTTCTCTCCACAGTCCC
		2072	684	194	722	472	1	1	1	1	1
rs2920816	GRCh38-Chr12:40469199-40469309 rs2920816-A	1276	433	126	407	310	0.616425	0.633041	0.649485	0.563712	0.659574	ATTATTTAACAGTTTCTGGAGTTATTAATAAATTGGATTATATAGCAATTGATAGCATGGAATTTGAAATAGAAAATATTAAAGTATTTCTATTTACAGATGATATAATAG
rs2920816	GRCh38-Chr12:40469199-40469309 rs2920816-G	766	240	68	305	153	0.370048	0.350877	0.350515	0.422438	0.325532	ATTATTTAACAGTTTCTGGAGTTATTAATAAATTGGATTATATAGCAATTGGTAGCATGGAATTTGAAATAGAAAATATTAAAGTATTTCTATTTACAGATGATATAATAG
rs2920816	GRCh38-Chr12:40469199-40469309 rs142684512-G; rs2920816-G	28	11	0	10	7	0.0135266	0.0160819	0	0.0138504	0.0148936	ATTATTTAACAGTTTCTGGAGTTATGAATAAATTGGATTATATAGCAATTGGTAGCATGGAATTTGAAATAGAAAATATTAAAGTATTTCTATTTACAGATGATATAATAG
	*	2070	684	194	722	470	1	1	1	1	1
rs2111980	GRCh38-Chr12:105934430-105934481 rs2111980-T	1100	408	127	331	234	0.530888	0.596491	0.654639	0.458449	0.495763	AGATCTTTGCCAGTGAGTCACGGAGCGGAGGCACCAGGCTGGAGCTTGAAGG
rs2111980	GRCh38-Chr12:105934430-105934481 rs2111980-C	912	221	67	391	233	0.440154	0.323099	0.345361	0.541551	0.493644	AGATCTTTGCCAGTGAGTCACGGAGCGGAGGCACCAGGCTGGAGCTCGAAGG
rs2111980	GRCh38-Chr12:105934430-105934481 rs79578959-T; rs2111980-T	60	55	0	0	5	0.0289575	0.0804094	0	0	0.0105932	AGATCTTTGCCAGTGAGTCATGGAGCGGAGGCACCAGGCTGGAGCTTGAAGG
		2072	684	194	722	472	1	1	1	1	1
rs10773760	GRCh38-Chr12:130277100-130277155 rs10773760-A	1306	485	135	406	280	0.630309	0.709064	0.695876	0.562327	0.59322	TGTTAGCCGTCGGGACCAGCTTCTGTCTGGAAGTTCGTCAAATTGCAGTTAAGTCC
rs10773760	GRCh38-Chr12:130277100-130277155 rs10773760-G	762	198	59	315	190	0.367761	0.289474	0.304124	0.436288	0.402542	TGTTAGCCGTCGGGACCAGCTTCTGTCTGGAAGTTCGTCAAATTGCAGTTAGGTCC
rs10773760	GRCh38-Chr12:130277100-130277155 rs185405753-G; rs10773760-G	3	1	0	1	1	0.00144788	0.00146199	0	0.00138504	0.00211864	TGTTAGCCGTCGGGACCAGCTTCTGTCTGGAAGTTCGTCGAATTGCAGTTAGGTCC
rs10773760	GRCh38-Chr12:130277100-130277155 rs1018126777-A; rs10773760-G	1	0	0	0	1	0.000482625	0	0	0	0.00211864	TGTTAGCCGTCGGGACCAGCTTCTGTCTGGAAGTTCGTCAAATTACAGTTAGGTCC
		2072	684	194	722	472	1	1	1	1	1
rs1335873	GRCh38-Chr13:20327551-20327614 rs1335873-A	1123	143	134	549	297	0.541988	0.209064	0.690722	0.760388	0.629237	TCCCGTACCAGGTACCTAGCTATGTACTCAGTATACCACGGCCAACAATACATACCTGCACCCT
rs1335873	GRCh38-Chr13:20327551-20327614 rs1335873-T	946	538	60	173	175	0.456564	0.78655	0.309278	0.239612	0.370763	TCCCGTACCAGGTACCTAGCTATGTACTCAGTATTCCACGGCCAACAATACATACCTGCACCCT
rs1335873	GRCh38-Chr13:20327551-20327614 rs537690824-T; rs1335873-T	3	3	0	0	0	0.00144788	0.00438596	0	0	0	TCCTGTACCAGGTACCTAGCTATGTACTCAGTATTCCACGGCCAACAATACATACCTGCACCCT
		2072	684	194	722	472	1	1	1	1	1
rs1886510	GRCh38-Chr13:21800531-21800600 rs1886510-G	1358	566	156	353	283	0.655405	0.827485	0.804124	0.48892	0.599576	TGACGCCTGGATTTTCACAACAACACTTGCGAATATTGCTTATTCTTTTAAGAATTACTAAAATTTACCC
rs1886510	GRCh38-Chr13:21800531-21800600 rs1886510-A	712	117	37	369	189	0.343629	0.171053	0.190722	0.51108	0.400424	TGACGCCTGGATTTTCACAACAACACTTGCAAATATTGCTTATTCTTTTAAGAATTACTAAAATTTACCC
rs1886510	GRCh38-Chr13:21800531-21800600 rs1886510-G; rs142721433-G	1	0	1	0	0	0.000482625	0	0.00515464	0	0	TGACGCCTGGATTTTCACAACAACACTTGCGAATATGGCTTATTCTTTTAAGAATTACTAAAATTTACCC
rs1886510	GRCh38-Chr13:21800531-21800600 rs1027587976-G; rs1886510-G	1	1	0	0	0	0.000482625	0.00146199	0	0	0	TGACGCCTGGATTTTCACAACAACAGTTGCGAATATTGCTTATTCTTTTAAGAATTACTAAAATTTACCC
		2072	684	194	722	472	1	1	1	1	1
rs1058083	GRCh38-Chr13:99385963-99385994 rs1058083-G	1238	402	108	469	259	0.59749	0.587719	0.556701	0.649584	0.548729	TTTGCTCAGAGTATCCGGAGTTAGCCACTAGG
rs1058083	GRCh38-Chr13:99385963-99385994 rs1058083-A	834	282	86	253	213	0.40251	0.412281	0.443299	0.350416	0.451271	TTTGCTCAGAGTATCCAGAGTTAGCCACTAGG
		2072	684	194	722	472	1	1	1	1	1
rs354439	GRCh38-Chr13:106285996-106286115 rs354439-A	1087	253	107	432	295	0.530244	0.372059	0.551546	0.606742	0.635776	TTCTTAACTCTCAAATTGCAGGTTGCGATAGAAAACAGTGAATGATATTCAGAATATTGTGCTTAAAAGGAATGTGATACATGAGAGAGATACATAAGGGAAAGAGAAGCCACCAGAACA
rs354439	GRCh38-Chr13:106285996-106286115 rs354439-T	953	420	87	278	168	0.464878	0.617647	0.448454	0.390449	0.362069	TTCTTAACTCTCAAATTGCAGGTTGCGATAGAAAACAGTGAATGATATTCAGAATATTGTGCTTAATAGGAATGTGATACATGAGAGAGATACATAAGGGAAAGAGAAGCCACCAGAACA
rs354439	GRCh38-Chr13:106285996-106286115 rs144284297-G; rs354439-T	9	7	0	1	1	0.00439024	0.0102941	0	0.00140449	0.00215517	TTCTTAACTCTCAAATTGCAGGTTGCGATAGAAAACAGTGAATGAGATTCAGAATATTGTGCTTAATAGGAATGTGATACATGAGAGAGATACATAAGGGAAAGAGAAGCCACCAGAACA
rs354439	GRCh38-Chr13:106285996-106286115 rs574448517-C; rs354439-T	1	0	0	1	0	0.000487805	0	0	0.00140449	0	TTCTTAACTCTCAAATTGCAGGTTGCGATAGAAAACCGTGAATGATATTCAGAATATTGTGCTTAATAGGAATGTGATACATGAGAGAGATACATAAGGGAAAGAGAAGCCACCAGAACA
	*	2050	680	194	712	464	1	1	1	1	1
rs1454361	GRCh38-Chr14:25381580-25381654 rs1454361-T	1214	470	98	388	258	0.585907	0.687135	0.505155	0.537396	0.54661	GTCCATCATCAGTAAGACACTTTTCAGTATCCATTTAGAAACAACATGCAGCTCAGGGTGTATTTCCCTCCTCCC
rs1454361	GRCh38-Chr14:25381580-25381654 rs1454361-A	854	211	96	333	214	0.412162	0.30848	0.494845	0.461219	0.45339	GTCCATCATCAGTAAGACACTTTTCAGTATCCATTTAGAAACAACAAGCAGCTCAGGGTGTATTTCCCTCCTCCC
rs1454361	GRCh38-Chr14:25381580-25381654 rs1454361-T; rs571330241-DEL_TTC	2	2	0	0	0	0.000965251	0.00292398	0	0	0	GTCCATCATCAGTAAGACACTTTTCAGTATCCATTTAGAAACAACATGCAGCTCAGGGTGTATCCTCCTCCC
rs1454361	GRCh38-Chr14:25381580-25381654 ss5982134731-C; rs1454361-T	1	0	0	1	0	0.000482625	0	0	0.00138504	0	GTCCATCATCAGTAAGACACTTCTCAGTATCCATTTAGAAACAACATGCAGCTCAGGGTGTATTTCCCTCCTCCC
rs1454361	GRCh38-Chr14:25381580-25381654 rs1034706816-A; rs1454361-T	1	1	0	0	0	0.000482625	0.00146199	0	0	0	GTCCATCATCAATAAGACACTTTTCAGTATCCATTTAGAAACAACATGCAGCTCAGGGTGTATTTCCCTCCTCCC
		2072	684	194	722	472	1	1	1	1	1
rs722290	GRCh38-Chr14:52749993-52750048 rs722290-C	1040	311	110	364	255	0.501931	0.454678	0.56701	0.504155	0.540254	CCCAAGACATCTCAGTATGTATATGCAAATATTTCAAAATCTGAAATCTGAAACAC
rs722290	GRCh38-Chr14:52749993-52750048 rs722290-G	1032	373	84	358	217	0.498069	0.545322	0.43299	0.495845	0.459746	CCCAAGACATCTGAGTATGTATATGCAAATATTTCAAAATCTGAAATCTGAAACAC
		2072	684	194	722	472	1	1	1	1	1
rs873196	GRCh38-Chr14:98379189-98379259 rs873196-T	1441	516	154	436	335	0.695463	0.754386	0.793814	0.603878	0.709746	TGCCCTTTGTAATGTGAACATGCCTGATTGACTCCAACTCCTGCCAGCCTTGGCATGCTCATTTGTGAACC
rs873196	GRCh38-Chr14:98379189-98379259 rs873196-C	631	168	40	286	137	0.304537	0.245614	0.206186	0.396122	0.290254	TGCCCCTTGTAATGTGAACATGCCTGATTGACTCCAACTCCTGCCAGCCTTGGCATGCTCATTTGTGAACC
		2072	684	194	722	472	1	1	1	1	1
rs4530059	GRCh38-Chr14:104302784-104302911 rs4530059-G	1345	459	135	446	305	0.649131	0.671053	0.695876	0.617729	0.646186	CAGAGCTCCAGAAGCAACTCCAGCACACGGAGAGGCGCTGATGTGCCTGTCAGGTGCTGCTACTGAGGAAGCCGTTGCTGGTCTCCGGAAGCTCTTGTATCCCCAGGAGTGCCGTCTGCCTGGCCTCC
rs4530059	GRCh38-Chr14:104302784-104302911 rs4530059-A; rs4450333-T	548	69	52	272	155	0.264479	0.100877	0.268041	0.376731	0.32839	CAGAGCTCCAGAAGCAACTCCAGCACACAGAGAGGCGCTGATGTGCCTGTCAGGTGCTGCTACTGAGGAAGCCGTTGCTGGTCTCCGGAAGCTCTTGTATCCTCAGGAGTGCCGTCTGCCTGGCCTCC
rs4530059	GRCh38-Chr14:104302784-104302911 rs4530059-A	173	152	7	2	12	0.0834942	0.222222	0.0360825	0.00277008	0.0254237	CAGAGCTCCAGAAGCAACTCCAGCACACAGAGAGGCGCTGATGTGCCTGTCAGGTGCTGCTACTGAGGAAGCCGTTGCTGGTCTCCGGAAGCTCTTGTATCCCCAGGAGTGCCGTCTGCCTGGCCTCC
rs4530059	GRCh38-Chr14:104302784-104302911 rs4530059-A; rs535737392-C	4	4	0	0	0	0.0019305	0.00584795	0	0	0	CAGAGCTCCAGAAGCAACTCCAGCACACAGAGAGGCGCTGATGTGCCCGTCAGGTGCTGCTACTGAGGAAGCCGTTGCTGGTCTCCGGAAGCTCTTGTATCCCCAGGAGTGCCGTCTGCCTGGCCTCC
rs4530059	GRCh38-Chr14:104302784-104302911 rs4530059-G; rs4450333-T	2	0	0	2	0	0.000965251	0	0	0.00277008	0	CAGAGCTCCAGAAGCAACTCCAGCACACGGAGAGGCGCTGATGTGCCTGTCAGGTGCTGCTACTGAGGAAGCCGTTGCTGGTCTCCGGAAGCTCTTGTATCCTCAGGAGTGCCGTCTGCCTGGCCTCC
		2072	684	194	722	472	1	1	1	1	1
rs1821380	GRCh38-Chr15:39021164-39021239 rs1821380-C	1221	416	121	421	263	0.589286	0.608187	0.623711	0.583102	0.557203	CTGTCTTTTCCTGACATTCTCCTTCTTCTATCTGTATCCCTTACTGCATTTTTGCACTGCAGTTCAGTGGCTCCAT
rs1821380	GRCh38-Chr15:39021164-39021239 rs1821380-G	834	256	73	301	204	0.40251	0.374269	0.376289	0.416898	0.432203	CTGTCTTTTCCTGACATTCTCCTTCTTCTATCTGTATGCCTTACTGCATTTTTGCACTGCAGTTCAGTGGCTCCAT
rs1821380	GRCh38-Chr15:39021164-39021239 rs76591310-G; rs1821380-C	17	12	0	0	5	0.00820463	0.0175439	0	0	0.0105932	CTGTCTTTTCCTGACGTTCTCCTTCTTCTATCTGTATCCCTTACTGCATTTTTGCACTGCAGTTCAGTGGCTCCAT
		2072	684	194	722	472	1	1	1	1	1
rs8037429	GRCh38-Chr15:53324706-53324716 rs8037429-C	1117	405	99	373	240	0.539093	0.592105	0.510309	0.51662	0.508475	GAGTTACGTAG
rs8037429	GRCh38-Chr15:53324706-53324716 rs8037429-T	955	279	95	349	232	0.460907	0.407895	0.489691	0.48338	0.491525	GAGTTATGTAG
		2072	684	194	722	472	1	1	1	1	1
rs1528460	GRCh38-Chr15:54918491-54918555 rs1528460-C	1035	571	69	224	171	0.500968	0.837243	0.35567	0.310249	0.365385	CTTAACATATTTAAGACTGAAAAATGTTACAGTAAAAGTTTTGTTTAATCCTGCATTTGCCAAAC
rs1528460	GRCh38-Chr15:54918491-54918555 rs1528460-T	1029	111	125	496	297	0.498064	0.162757	0.64433	0.686981	0.634615	CTTAACATATTTAAGATTGAAAAATGTTACAGTAAAAGTTTTGTTTAATCCTGCATTTGCCAAAC
rs1528460	GRCh38-Chr15:54918491-54918555 rs1528460-T; rs1000513973-C	1	0	0	1	0	0.000484027	0	0	0.00138504	0	CTTAACATATTTAAGATTGAAAAATGTTACAGTACAAGTTTTGTTTAATCCTGCATTTGCCAAAC
rs1528460	GRCh38-Chr15:54918491-54918555 rs1528460-T; rs1281510754-T	1	0	0	1	0	0.000484027	0	0	0.00138504	0	CTTAACATATTTAAGATTGAAAAATGTTACAGTAAAAGTTTTGTTTAATCCTTCATTTGCCAAAC
	*	2066	682	194	722	468	1	1	1	1	1
rs729172	GRCh38-Chr16:5556181-5556221 rs729172-G	1428	552	171	400	305	0.689189	0.807018	0.881443	0.554017	0.646186	CGGTTACATACATTCGGTCTGCAGAGGAGCCTTGGTCATAT
rs729172	GRCh38-Chr16:5556181-5556221 rs729172-T	643	131	23	322	167	0.310328	0.19152	0.118557	0.445983	0.353814	CGGTTACATACATTCTGTCTGCAGAGGAGCCTTGGTCATAT
rs729172	GRCh38-Chr16:5556181-5556221 rs729172-G; rs1395231170-DEL_AT	1	1	0	0	0	0.000482625	0.00146199	0	0	0	CGGTTACATACATTCGGTCTGCAGAGGAGCCTTGGTCAT
		2072	684	194	722	472	1	1	1	1	1
rs2342747	GRCh38-Chr16:5818670-5818723 rs2342747-G	1361	435	133	503	290	0.657488	0.635965	0.685567	0.698611	0.614407	GGAGGAAGAAAACAGAGAGTCTTGACCGTGGAGGGGACAACAAAGAATGAGCTT
rs2342747	GRCh38-Chr16:5818670-5818723 rs2342747-A	706	246	61	217	182	0.341063	0.359649	0.314433	0.301389	0.385593	GGAGGAAGAAAACAGAGAGTCTTGACCGTAGAGGGGACAACAAAGAATGAGCTT
rs2342747	GRCh38-Chr16:5818670-5818723 rs2342747-G; rs140745596-T	3	3	0	0	0	0.00144928	0.00438596	0	0	0	GGAGGAAGAAAACAGAGAGTCTTGACCGTGGAGGGGACAACAAAGTATGAGCTT
	*	2070	684	194	720	472	1	1	1	1	1
rs430046	GRCh38-Chr16:77983107-77983174 rs430046-C	1292	468	113	418	293	0.623552	0.684211	0.582474	0.578947	0.620763	AAGGTCATACAATGAATGGTGTGATGTAAACGCTTGGGAGGCGATTTCTGAGGGTAGGTGCTGGGTTT
rs430046	GRCh38-Chr16:77983107-77983174 rs409820-A; rs430044-T; rs430046-T	772	211	80	304	177	0.372587	0.30848	0.412371	0.421053	0.375	AAGGTCATACAATGAATGGTGTGATGTAAAAGCTTGGGAGGTGATTTTTGAGGGTAGGTGCTGGGTTT
rs430046	GRCh38-Chr16:77983107-77983174 rs409820-A; rs430044-T; rs430046-T; rs190617353-G	4	3	0	0	1	0.0019305	0.00438596	0	0	0.00211864	AAGGTCATACAATGAATGGTGTGATGTAAAAGCTTGGGAGGTGATTTTTGAGGGTAGGTGCTGGGTGT
rs430046	GRCh38-Chr16:77983107-77983174 rs148208213-A; rs430046-C	1	0	1	0	0	0.000482625	0	0.00515464	0	0	AAGGTCATACAATGAATGGTGTGATGTAAACGCTAGGGAGGCGATTTCTGAGGGTAGGTGCTGGGTTT
rs430046	GRCh38-Chr16:77983107-77983174 rs2018414585-A rs409820-A; rs430044-T; rs430046-T	1	1	0	0	0	0.000482625	0.00146199	0	0	0	AAGGTCATACAAAGAATGGTGTGATGTAAAAGCTTGGGAGGTGATTTTTGAGGGTAGGTGCTGGGTTT
rs430046	GRCh38-Chr16:77983107-77983174 rs430046-C; rs887563102-DEL_A	1	1	0	0	0	0.000482625	0.00146199	0	0	0	AAGGTCATACAATGAATGGTGTGATGTAAACGCTTGGGAGGCGATTTCTGGGGTAGGTGCTGGGTTT
rs430046	GRCh38-Chr16:77983107-77983174 rs430044-T; rs430046-C	1	0	0	0	1	0.000482625	0	0	0	0.00211864	AAGGTCATACAATGAATGGTGTGATGTAAACGCTTGGGAGGTGATTTCTGAGGGTAGGTGCTGGGTTT
		2072	684	194	722	472	1	1	1	1	1
rs1382387	GRCh38-Chr16:80072444-80072489 rs1382387-A	1264	280	132	513	339	0.610039	0.409357	0.680412	0.710526	0.71822	GCATCTGCCCACTGCAGGGAATTGAAAGTTCAGGTGTTTCTCCTTC
rs1382387	GRCh38-Chr16:80072444-80072489 rs1382387-C	807	404	62	208	133	0.389479	0.590643	0.319588	0.288089	0.28178	GCATCTGCCCACTGCAGGGACTTGAAAGTTCAGGTGTTTCTCCTTC
rs1382387	GRCh38-Chr16:80072444-80072489 rs1382387-A; rs531107594-T	1	0	0	1	0	0.000482625	0	0	0.00138504	0	GCATCTGCCCACTGCAGGGAATTGAAAGTTCAGGTGTTTCTTCTTC
		2072	684	194	722	472	1	1	1	1	1
rs9905977	GRCh38-Chr17:3016058-3016176 rs9905977-G	1238	434	114	422	268	0.59749	0.634503	0.587629	0.584488	0.567797	TGGTGTCCAAGGAGGGCTGGGTGACTCGTGGCTCAGTCAGCGTCAAGATTCCTTTCGTCTTTCCCCTCTGCCCTCCCTGGCTTGTCAGCTTTGTCCCTCAGGCTTGGCCCCTCGTGGCC
rs9905977	GRCh38-Chr17:3016058-3016176 rs9905977-A	610	168	76	211	155	0.294402	0.245614	0.391753	0.292244	0.32839	TGGTGTCCAAGGAGGGCTGGGTGACTCGTGGCTCAGTCAGCATCAAGATTCCTTTCGTCTTTCCCCTCTGCCCTCCCTGGCTTGTCAGCTTTGTCCCTCAGGCTTGGCCCCTCGTGGCC
rs9905977	GRCh38-Chr17:3016058-3016176 rs9905977-G; rs73298992-T	177	44	1	86	46	0.0854247	0.0643275	0.00515464	0.119114	0.0974576	TGGTGTCCAAGGAGGGCTGGGTGACTCGTGGCTCAGTCAGCGTCAAGATTCCTTTCGTCTTTCCCCTCTGCCCTCCCTGGCTTGTCAGCTTTGTCCCTCAGGCTTGGCCTCTCGTGGCC
rs9905977	GRCh38-Chr17:3016058-3016176 rs9905977-G; rs28582109-A	47	38	3	3	3	0.0226834	0.0555556	0.0154639	0.00415512	0.00635593	TGGTGTCCAAGGAGGGCTGGGTGACTCGTGGCTCAGTCAGCGTCAAGATTCCTTTCGTCTTTCCCCTCTGCCCTCCCTAGCTTGTCAGCTTTGTCCCTCAGGCTTGGCCCCTCGTGGCC
		2072	684	194	722	472	1	1	1	1	1
rs740910	GRCh38-Chr17:5803260-5803323 rs740910-A	1458	574	167	455	262	0.703668	0.839181	0.860825	0.630194	0.555085	AAGTATAACAGTTTGCTAAGTAAGGTGAGTGGTATAATCATATATTTGTAAAAAGCAAAACAAA
rs740910	GRCh38-Chr17:5803260-5803323 rs740910-G	446	51	24	208	163	0.215251	0.0745614	0.123711	0.288089	0.345339	AAGTATAACAGTTTGCTAAGTAAGGTGAGTGGTATAATCATATGTTTGTAAAAAGCAAAACAAA
rs740910	GRCh38-Chr17:5803260-5803323 rs60810599-G; rs740910-A	157	50	3	58	46	0.0757722	0.0730994	0.0154639	0.0803324	0.0974576	AAGTGTAACAGTTTGCTAAGTAAGGTGAGTGGTATAATCATATATTTGTAAAAAGCAAAACAAA
rs740910	GRCh38-Chr17:5803260-5803323 rs565694318-DEL_ATCATA; rs740910-A	10	9	0	0	1	0.00482625	0.0131579	0	0	0.00211864	AAGTATAACAGTTTGCTAAGTAAGGTGAGTGGTATATATTTGTAAAAAGCAAAACAAA
rs740910	GRCh38-Chr17:5803260-5803323 rs1451296593-A; rs740910-A	1	0	0	1	0	0.000482625	0	0	0.00138504	0	AAGTATAACAGTTTGCTAAGTAAAGTGAGTGGTATAATCATATATTTGTAAAAAGCAAAACAAA
		2072	684	194	722	472	1	1	1	1	1
rs938283	GRCh38-Chr17:79472374-79472426 rs938283-T	1764	601	158	603	402	0.851351	0.878655	0.814433	0.83518	0.851695	CATACATTGAAGTCCTAACCCCTAGTACGTTAGATGTGACCGTATTTGGAGAT
rs938283	GRCh38-Chr17:79472374-79472426 rs938283-C	306	82	35	119	70	0.147683	0.119883	0.180412	0.16482	0.148305	CATACATTGAAGTCCTAACCCCTAGTACGTTAGATGTGACCGCATTTGGAGAT
rs938283	GRCh38-Chr17:79472374-79472426 rs968245314-A; rs938283-T	1	0	1	0	0	0.000482625	0	0.00515464	0	0	CATACATTGAAGTCCTAACCCCTAGTACGTTAGATGTGACCATATTTGGAGAT
rs938283	GRCh38-Chr17:79472374-79472426 rs938283-C; rs1031265526-G	1	1	0	0	0	0.000482625	0.00146199	0	0	0	CATACATTGAAGTCCTAACCCCTAGTACGTTAGATGTGACCGCGTTTGGAGAT
		2072	684	194	722	472	1	1	1	1	1
rs8078417	GRCh38-Chr17:82503992-82504093 rs8078417-C	1409	413	143	546	307	0.680019	0.603801	0.737113	0.756233	0.650424	GGGGACGCCTGGCGCTGCGAGGGAGGCCCCGAGCCTCGTGCCCCCGTGAAGCTTCAGCTCCCCTCCCCGGCTGTCCTTGAGGCTCTTCTCACACTCAGATGC
rs8078417	GRCh38-Chr17:82503992-82504093 rs8078417-T	581	204	47	170	160	0.280405	0.298246	0.242268	0.235457	0.338983	GGGGACGCCTGGCGCTGCGAGGGAGGCCCCGAGCCTCGTGCCCCCGTGAAGCTTCAGCTCCCCTCCCTGGCTGTCCTTGAGGCTCTTCTCACACTCAGATGC
rs8078417	GRCh38-Chr17:82503992-82504093 rs78650971-C; rs8078417-T	44	41	0	2	1	0.0212355	0.0599415	0	0.00277008	0.00211864	GGGCACGCCTGGCGCTGCGAGGGAGGCCCCGAGCCTCGTGCCCCCGTGAAGCTTCAGCTCCCCTCCCTGGCTGTCCTTGAGGCTCTTCTCACACTCAGATGC
rs8078417	GRCh38-Chr17:82503992-82504093 rs78650971-C ; rs8078417-C	25	20	0	1	4	0.0120656	0.0292398	0	0.00138504	0.00847458	GGGCACGCCTGGCGCTGCGAGGGAGGCCCCGAGCCTCGTGCCCCCGTGAAGCTTCAGCTCCCCTCCCCGGCTGTCCTTGAGGCTCTTCTCACACTCAGATGC
rs8078417	GRCh38-Chr17:82503992-82504093 rs138630479-A; rs8078417-C	4	2	0	2	0	0.0019305	0.00292398	0	0.00277008	0	GGGGACGCCTGGCGCTGCGAGGGAGGCCCCGAGCCTCATGCCCCCGTGAAGCTTCAGCTCCCCTCCCCGGCTGTCCTTGAGGCTCTTCTCACACTCAGATGC
rs8078417	GRCh38-Chr17:82503992-82504093 rs182919351-T; rs8078417-C	3	0	3	0	0	0.00144788	0	0.0154639	0	0	GGGGACGCCTGGTGCTGCGAGGGAGGCCCCGAGCCTCGTGCCCCCGTGAAGCTTCAGCTCCCCTCCCCGGCTGTCCTTGAGGCTCTTCTCACACTCAGATGC
rs8078417	GRCh38-Chr17:82503992-82504093 rs559299986-A; rs8078417-C	2	2	0	0	0	0.000965251	0.00292398	0	0	0	GGGGACGCCTGGCGCTGCGAGGGAGGCCCCGAGCCTCGTGCCCCCATGAAGCTTCAGCTCCCCTCCCCGGCTGTCCTTGAGGCTCTTCTCACACTCAGATGC
rs8078417	GRCh38-Chr17:82503992-82504093 rs78650971-C; rs559299986-A; rs8078417-C	1	1	0	0	0	0.000482625	0.00146199	0	0	0	GGGCACGCCTGGCGCTGCGAGGGAGGCCCCGAGCCTCGTGCCCCCATGAAGCTTCAGCTCCCCTCCCCGGCTGTCCTTGAGGCTCTTCTCACACTCAGATGC
rs8078417	GRCh38-Chr17:82503992-82504093 rs8078417-C; rs1003845167-A	1	1	0	0	0	0.000482625	0.00146199	0	0	0	GGGGACGCCTGGCGCTGCGAGGGAGGCCCCGAGCCTCGTGCCCCCGTGAAGCTTCAGCTCCCCTCCCCAGCTGTCCTTGAGGCTCTTCTCACACTCAGATGC
rs8078417	GRCh38-Chr17:82503992-82504093 rs8078417-C; rs1251308240-DEL_G	1	0	1	0	0	0.000482625	0	0.00515464	0	0	GGGGACGCCTGGCGCTGCGAGGGAGGCCCCGAGCCTCGTGCCCCCGTGAAGCTTCAGCTCCCCTCCCCGCTGTCCTTGAGGCTCTTCTCACACTCAGATGC
rs8078417	GRCh38-Chr17:82503992-82504093 rs1013437705-T; rs8078417-T	1	0	0	1	0	0.000482625	0	0	0.00138504	0	GGGGACGCCTGGCGCTGCGAGGGAGGCCCTGAGCCTCGTGCCCCCGTGAAGCTTCAGCTCCCCTCCCTGGCTGTCCTTGAGGCTCTTCTCACACTCAGATGC
		2072	684	194	722	472	1	1	1	1	1
rs1493232	GRCh38-Chr18:1127969-1127996 rs1493232-A	1201	373	76	469	283	0.580193	0.546921	0.391753	0.649584	0.599576	TTTTGGGTGCTAGGCCACAAAATAAACA
rs1493232	GRCh38-Chr18:1127969-1127996 rs1493232-C	868	309	118	253	188	0.419324	0.453079	0.608247	0.350416	0.398305	TTTTGGGTGCTAGGCCCCAAAATAAACA
rs1493232	GRCh38-Chr18:1127969-1127996 rs1906582359-G; rs1493232-A	1	0	0	0	1	0.000483092	0	0	0	0.00211864	TTTTGGGTGCTGGGCCACAAAATAAACA
	*	2070	682	194	722	472	1	1	1	1	1
rs9951171	GRCh38-Chr18:9749816-9749890 rs9951171-G	1154	361	120	407	266	0.55695	0.527778	0.618557	0.563712	0.563559	GGGAGAAAAGTCCTCGTTGTTCCTCTGGGATGCAACATGAGAGAGCAGCACACTGAGGCTTTATGGGTTGCCCTG
rs9951171	GRCh38-Chr18:9749816-9749890 rs9951171-A	907	320	74	313	200	0.437741	0.467836	0.381443	0.433518	0.423729	GGGAGAAAAGTCCTCGTTGTTCCTCTGGGATGCAACATGAGAGAGCAGCACACTGAGGCTTTATGGATTGCCCTG
rs9951171	GRCh38-Chr18:9749816-9749890 rs145524126-C; rs9951171-G	10	3	0	2	5	0.00482625	0.00438596	0	0.00277008	0.0105932	GGGAGAACAGTCCTCGTTGTTCCTCTGGGATGCAACATGAGAGAGCAGCACACTGAGGCTTTATGGGTTGCCCTG
rs9951171	GRCh38-Chr18:9749816-9749890 ss5982134732-T; rs9951171-A	1	0	0	0	1	0.000482625	0	0	0	0.00211864	GGGAGAAAAGTCCTCGTTGTTCCTCTGGGTTGCAACATGAGAGAGCAGCACACTGAGGCTTTATGGATTGCCCTG
		2072	684	194	722	472	1	1	1	1	1
rs1736442	GRCh38-Chr18:57558486-57558588 rs1736442-C	1013	353	129	293	238	0.669089	0.689453	0.708791	0.620763	0.683908	CGCTTGTCTGAATGGAGACCCCCCCACTCAACACACAGAAACATCAAGCTGAGCTCTGCCGACAGGGCAGGCAAAAGCAGCCTTCTCTTAACTGTCCCACTTA
rs1736442	GRCh38-Chr18:57558486-57558588 rs1736442-T	499	157	53	179	110	0.32959	0.306641	0.291209	0.379237	0.316092	CGCTTGTCTGAATGGAGACCCCCCCACTCAACACACAGAAACATCAAGCTGAGCTCTGCTGACAGGGCAGGCAAAAGCAGCCTTCTCTTAACTGTCCCACTTA
rs1736442	GRCh38-Chr18:57558486-57558588 rs1736442-C; rs529597152-A	2	2	0	0	0	0.001321	0.00390625	0	0	0	CGCTTGTCTGAATGGAGACCCCCCCACTCAACACACAGAAACATCAAGCTGAGCTCTGCCAACAGGGCAGGCAAAAGCAGCCTTCTCTTAACTGTCCCACTTA
	*	1514	512	182	472	348	1	1	1	1	1
rs1024116	GRCh38-Chr18:77720385-77720433 rs1024116-C	1198	444	171	345	238	0.578185	0.649123	0.881443	0.477839	0.504237	TGGGAAGTGAGCAAAAGTAAATACAAAGGCATACTTTATTAAGTGCATG
rs1024116	GRCh38-Chr18:77720385-77720433 rs1024116-T	874	240	23	377	234	0.421815	0.350877	0.118557	0.522161	0.495763	TGGGAAGTGAGCAAAAGTAAATACAAAGGCATACTTTATTAAGTGTATG
		2072	684	194	722	472	1	1	1	1	1
rs719366	GRCh38-Chr19:27972398-27972517 rs719366-A	1504	560	148	450	346	0.730097	0.823529	0.762887	0.630252	0.733051	GAGTAAAGGACAGGCCCCCAGAGGAGTAGCTACTAGAATGGGAGGAGGAAAAGCAGGAAAGGATAATAAAAGAGTTAAAAGATGCTGTGGTCACAGTGCTGAATGCTGCCGAGAAGTGAC
rs719366	GRCh38-Chr19:27972398-27972517 rs719366-G	549	120	39	264	126	0.266505	0.176471	0.201031	0.369748	0.266949	GAGTAAAGGACAGGCCCCCAGAGGAGTAGCTGCTAGAATGGGAGGAGGAAAAGCAGGAAAGGATAATAAAAGAGTTAAAAGATGCTGTGGTCACAGTGCTGAATGCTGCCGAGAAGTGAC
rs719366	GRCh38-Chr19:27972398-27972517 rs719366-G; rs719367-A	7	0	7	0	0	0.00339806	0	0.0360825	0	0	GAGTAAAGGACAGGCCCCCAGAGGAGTAGCTGCTAGAATGGGAGGAGGAAAAGCAGGAAAGGATAATAAAAGAGTTAAAAGATGCTGTGGTCACAGTGCTGAATGCTGCCAAGAAGTGAC
	*	2060	680	194	714	472	1	1	1	1	1
rs576261	GRCh38-Chr19:39069160-39069188 rs576261-A	1128	383	119	382	244	0.544402	0.559942	0.613402	0.529086	0.516949	GTCACCAACCCTGGCCTCACAACTCTCTC
rs576261	GRCh38-Chr19:39069160-39069188 rs576261-C	944	301	75	340	228	0.455598	0.440058	0.386598	0.470914	0.483051	GTCACCACCCCTGGCCTCACAACTCTCTC
		2072	684	194	722	472	1	1	1	1	1
rs1031825	GRCh38-Chr20:4466793-4466869 rs1031825-C	979	249	85	393	252	0.611875	0.45438	0.574324	0.722426	0.7	GTCCTTAACCTATTAAATTTTAATGAGTATTTTATTTATCTAACCCCCGAGCATACTTGAAAGCAGTGATTATATCT
rs1031825	GRCh38-Chr20:4466793-4466869 rs1031825-A	619	297	63	151	108	0.386875	0.541971	0.425676	0.277574	0.3	GTCCTTAACCTATTAAATTTTAATGAGTATTTTATTTATCTAAACCCCGAGCATACTTGAAAGCAGTGATTATATCT
rs1031825	GRCh38-Chr20:4466793-4466869 rs1204187713-DEL_TTTA; rs1031825-C	1	1	0	0	0	0.000625	0.00182482	0	0	0	GTCCTTAACCTATTAAATTTTAATGAGTATTTTATCTAACCCCCGAGCATACTTGAAAGCAGTGATTATATCT
rs1031825	GRCh38-Chr20:4466793-4466869 rs1031825-A; rs1052803192-A	1	1	0	0	0	0.000625	0.00182482	0	0	0	GTCCTTAACCTATTAAATTTTAATGAGTATTTTATTTATCTAAACCCCGAGCATACATGAAAGCAGTGATTATATCT
	*	1600	548	148	544	360	1	1	1	1	1
rs445251	GRCh38-Chr20:15144244-15144311 rs369438-C; rs445251-C	1243	395	132	440	276	0.599903	0.577485	0.680412	0.609418	0.584746	ACCCGGCCTACAATTCAAATTAATGTAAAAACTGCAAGTGGTTCGTGATCAAAACTCCAATGCACATG
rs445251	GRCh38-Chr20:15144244-15144311 rs445251-G	817	288	62	274	193	0.394305	0.421053	0.319588	0.379501	0.408898	ACCTGGCCTACAATTCAAATTAATGTAAAAACTGCAAGTGGTTGGTGATCAAAACTCCAATGCACATG
rs445251	GRCh38-Chr20:15144244-15144311 rs445251-G; rs117702247-A	12	1	0	8	3	0.00579151	0.00146199	0	0.0110803	0.00635593	ACCTGGCCTACAATTCAAATTAATGTAAAAACTGCAAGTGGTTGGTGATCAAAACTCCAATGCACATA
		2072	684	194	722	472	1	1	1	1	1
rs1005533	GRCh38-Chr20:40858446-40858561 rs1005533-G	1055	309	128	346	272	0.509662	0.453079	0.659794	0.479224	0.576271	GCAAAAAGCAAGAGCCGTGGAATTGAGTCGCCGCTGTTCAGGGGAGGCATAAGGAGCTGGAGGACTGGGTGGGCTCGGCAGCTTCCCTGGTCTTGCCCCTGCACTCCTCACCCAGC
rs1005533	GRCh38-Chr20:40858446-40858561 rs1005533-A	1015	373	66	376	200	0.490338	0.546921	0.340206	0.520776	0.423729	GCAAAAAGCAAGAGCCGTGGAATTAAGTCGCCGCTGTTCAGGGGAGGCATAAGGAGCTGGAGGACTGGGTGGGCTCGGCAGCTTCCCTGGTCTTGCCCCTGCACTCCTCACCCAGC
	*	2070	682	194	722	472	1	1	1	1	1
rs1523537	GRCh38-Chr20:52679563-52679632 rs1523537-T	1120	305	111	409	295	0.540541	0.445906	0.572165	0.566482	0.625	TCTTAATACATTCATTTCTGCATGGGTGGGGTTTCAGTCTGCAACAAGATCTTGTAGGGATGCTATCGCT
rs1523537	GRCh38-Chr20:52679563-52679632 rs1523537-C	846	288	82	307	169	0.408301	0.421053	0.42268	0.425208	0.358051	TCTTAATACATTCATTTCTGCATGGGTGGGGTTTCAGTCTGCAACAAGATCTTGTAGGGACGCTATCGCT
rs1523537	GRCh38-Chr20:52679563-52679632 rs77195753-G; rs1523537-T	101	87	1	5	8	0.0487452	0.127193	0.00515464	0.00692521	0.0169492	TCTTAATACATTCATTTCTGCGTGGGTGGGGTTTCAGTCTGCAACAAGATCTTGTAGGGATGCTATCGCT
rs1523537	GRCh38-Chr20:52679563-52679632 rs538906241-C; rs1523537-C	5	4	0	1	0	0.00241313	0.00584795	0	0.00138504	0	TCTTAATACATTCATTTCTCCATGGGTGGGGTTTCAGTCTGCAACAAGATCTTGTAGGGACGCTATCGCT
		2072	684	194	722	472	1	1	1	1	1
rs722098	GRCh38-Chr21:15313267-15313315 rs722098-A	1148	185	89	591	283	0.554054	0.270468	0.458763	0.81856	0.599576	GAAATATCCTTGATAAGGATTTAAATTTTGGATGTGCTGAATATTTCTT
rs722098	GRCh38-Chr21:15313267-15313315 rs722098-G	924	499	105	131	189	0.445946	0.729532	0.541237	0.18144	0.400424	GAAATATCCTTGGTAAGGATTTAAATTTTGGATGTGCTGAATATTTCTT
		2072	684	194	722	472	1	1	1	1	1
rs2830795	GRCh38-Chr21:27235795-27235862 rs2830795-A	1338	471	70	502	295	0.645753	0.688596	0.360825	0.695291	0.625	ACTGGGTTCACTTCTATAGACATAGGACACACCATTTTATTGTCTAAAGAGCAAAGAAGTCCTATTAT
rs2830795	GRCh38-Chr21:27235795-27235862 rs2830795-G	486	92	93	194	107	0.234556	0.134503	0.479381	0.268698	0.226695	ACTGGGTTCACTTCTATAGACATAGGACACACCATTTTATTGTCTAAAGGGCAAAGAAGTCCTATTAT
rs2830795	GRCh38-Chr21:27235795-27235862 rs12626695-C; rs2830795-A	190	85	30	14	61	0.0916988	0.124269	0.154639	0.0193906	0.129237	ACTGGGTTCACCTCTATAGACATAGGACACACCATTTTATTGTCTAAAGAGCAAAGAAGTCCTATTAT
rs2830795	GRCh38-Chr21:27235795-27235862 rs79319609-T; rs2830795-A	44	33	1	1	9	0.0212355	0.0482456	0.00515464	0.00138504	0.0190678	ACTGGGTTCACTTCTATAGACATAGGACACACCATTTTATTGTCTAATGAGCAAAGAAGTCCTATTAT
rs2830795	GRCh38-Chr21:27235795-27235862 rs12626695-C; rs2830795-G	13	3	0	10	0	0.00627413	0.00438596	0	0.0138504	0	ACTGGGTTCACCTCTATAGACATAGGACACACCATTTTATTGTCTAAAGGGCAAAGAAGTCCTATTAT
rs2830795	GRCh38-Chr21:27235795-27235862 rs562236636-T; rs2830795-G	1	0	0	1	0	0.000482625	0	0	0.00138504	0	ACTGGGTTCACTTCTATAGACATAGGACATACCATTTTATTGTCTAAAGGGCAAAGAAGTCCTATTAT
		2072	684	194	722	472	1	1	1	1	1
rs2831700	GRCh38-Chr21:28307343-28307376 rs2831700-A	1253	457	107	429	260	0.60473	0.668129	0.551546	0.594183	0.550847	ATTTGGCTAAACTATTGCCGGAGATAAGTTAGAA
rs2831700	GRCh38-Chr21:28307343-28307376 rs2831700-G	817	227	87	291	212	0.394305	0.331871	0.448454	0.403047	0.449153	ATTTGGCTAAACTATTGCCGGAGATGAGTTAGAA
rs2831700	GRCh38-Chr21:28307343-28307376 rs2831700-G; rs1986784701-A	1	0	0	1	0	0.000482625	0	0	0.00138504	0	ATTTGGCTAAACTATTGCCGGAGATGAATTAGAA
rs2831700	GRCh38-Chr21:28307343-28307376 rs575053109-DEL_T; rs2831700-A	1	0	0	1	0	0.000482625	0	0	0.00138504	0	ATTTGGCTAAACTATGCCGGAGATAAGTTAGAA
		2072	684	194	722	472	1	1	1	1	1
rs914165	GRCh38-Chr21:41043962-41044005 rs914165-A	1125	516	61	303	245	0.544004	0.756598	0.317708	0.419668	0.519068	CAAGCAGCAGAGCCTGGATGCTGATGGGCACCAAAGAGGGCAAC
rs914165	GRCh38-Chr21:41043962-41044005 rs914165-G	943	166	131	419	227	0.455996	0.243402	0.682292	0.580332	0.480932	CAAGCAGCAGAGCCTGGATGCTGATGGGCACCAAAGAGGGCGAC
	*	2068	682	192	722	472	1	1	1	1	1
rs221956	GRCh38-Chr21:42186845-42186896 rs221956-C	1376	442	128	504	302	0.664093	0.646199	0.659794	0.698061	0.639831	TTCCCTCCAGCTCTCCTCTCCCCTTTCTGAGCCCTCAGCAAACTGACTTTAG
rs221956	GRCh38-Chr21:42186845-42186896 rs221956-T	693	241	66	217	169	0.334459	0.352339	0.340206	0.300554	0.358051	TTCCCTCCAGCTCTCCTCTCCCCTTTCTGAGCCCTCAGCAAATTGACTTTAG
rs221956	GRCh38-Chr21:42186845-42186896 rs221956-C; rs182328575-C	3	1	0	1	1	0.00144788	0.00146199	0	0.00138504	0.00211864	TTCCCTCCAGCTCTCCTCTCCCCTTTCTGAGCCCTCAGCAAACTGACTTTCG
		2072	684	194	722	472	1	1	1	1	1
rs733164	GRCh38-Chr22:27420770-27420849 rs733164-G	1468	452	167	537	312	0.708494	0.660819	0.860825	0.743767	0.661017	CCAGGCTCAGCTTTCAGCCCCAGGTCCCACCAACAGGCCATCCCACTTGGAAAGTTTGCCTGACATTCCTGAGCCGGGCC
rs733164	GRCh38-Chr22:27420770-27420849 rs733164-A	602	231	26	185	160	0.290541	0.337719	0.134021	0.256233	0.338983	CCAGGCTCAGCTTTCAGCCCCAGGTCCCACCAACAGGCCATCCCACTTGGAAAATTTGCCTGACATTCCTGAGCCGGGCC
rs733164	GRCh38-Chr22:27420770-27420849 rs733164-G; rs770724398-T	1	1	0	0	0	0.000482625	0.00146199	0	0	0	CCAGGCTCAGCTTTCAGCCCCAGGTCCCACCAACAGGCCATCCCACTTGGAAAGTTTGCCTGACATTCCTGAGCCGGGCT
rs733164	GRCh38-Chr22:27420770-27420849 rs1926179279-T rs733164-G	1	0	1	0	0	0.000482625	0	0.00515464	0	0	CCAGGCTCAGCTTTTAGCCCCAGGTCCCACCAACAGGCCATCCCACTTGGAAAGTTTGCCTGACATTCCTGAGCCGGGCC
		2072	684	194	722	472	1	1	1	1	1
rs987640	GRCh38-Chr22:33163486-33163560 rs987640-T	1103	375	90	374	264	0.532336	0.548246	0.463918	0.518006	0.559322	ACAGGTACATTCACTTAACAGGCTCTCTTTCCACCCTTGTAGAAATACAAAAATAAGACTTAATACAGACGATGG
rs987640	GRCh38-Chr22:33163486-33163560 rs987640-A	867	298	102	279	188	0.418436	0.435673	0.525773	0.386427	0.398305	ACAGGTACATTCACTTAACAGGCTCTCTTTCCACCCATGTAGAAATACAAAAATAAGACTTAATACAGACGATGG
rs987640	GRCh38-Chr22:33163486-33163560 rs17793354-C; rs987640-A	102	11	2	69	20	0.0492278	0.0160819	0.0103093	0.0955679	0.0423729	ACCGGTACATTCACTTAACAGGCTCTCTTTCCACCCATGTAGAAATACAAAAATAAGACTTAATACAGACGATGG
		2072	684	194	722	472	1	1	1	1	1
rs2040411	GRCh38-Chr22:47440656-47440672 rs2040411-A	1382	523	71	468	320	0.666988	0.76462	0.365979	0.648199	0.677966	AAGTGCATATTTCATGA
rs2040411	GRCh38-Chr22:47440656-47440672 rs2040411-G	690	161	123	254	152	0.333012	0.23538	0.634021	0.351801	0.322034	AAGTGCGTATTTCATGA
		2072	684	194	722	472	1	1	1	1	1
rs1028528	GRCh38-Chr22:47966528-47966563 rs1028528-A	1219	202	130	534	353	0.58832	0.295322	0.670103	0.739612	0.747881	CTTACTCGACATCACTGTGTGCAGATCCGCGGAGGT
rs1028528	GRCh38-Chr22:47966528-47966563 rs1028528-G	853	482	64	188	119	0.41168	0.704678	0.329897	0.260388	0.252119	CTTACTCGACATCGCTGTGTGCAGATCCGCGGAGGT
		2072	684	194	722	472	1	1	1	1	1
	*Decreased sample number due to data below threshold
	**Decreased sample number due to removal of tri-allele from AfAm
