# Supplementary material for: US Population Data for 94 Identity-Informative SNP Loci
Source: Genes (Basel). 2023 May 12;14(5):1071. doi: 10.3390/genes14051071 (PMC10217833; doi:10.3390/genes14051071)
Supplement: Supplementary file 1 [file genes-14-01071-s001.zip › Table S6 Novel Microhaplotypes.xlsx]

## Sheet: Description
DOI 10.18434/t4/1500024
Supplementary Table S6 to: Kiesler et al., U.S. population data for 94 identity informative SNP loci. Genes (2023)
Description: Table of microhaplotypes in a set of 1036 U.S. population samples, 46 of which have not been previously registered in the STRait Razorv3.0 (A. E. Woerner, J. L. King, B. Budowle, Fast STR allele identification with STRait Razor 3.0, Forensic Sci Int Genet. 30 (2017) 18-23) sequence string matching database as of publication of this manuscript. Samples were processed with ForenSeq DNA…

## Sheet: Novel Sequences
Supplementary Table S6 to: Kiesler et al., U.S. population data for 94 identity informative SNP loci. Genes (2023)
UAS Locus	Nomenclature		Text String						rs755874501	rs201654817			rs560681
rs560681	GRCh38-Chr1:160816871-160816918 rs560681-A	Ref	TCCATCTCTATTTACTCAGGTCACAGGACCTTGGGGCCTCCAAGAGTT	T	C	C	A	T	C	T	C	T	A	T	T	T	A	C	T	C	A	G	G	T	C	A	C	A	G	G	A	C	C	T	T	G	G	G	G	C	C	T	C	C	A	A	G	A	G
rs560681	GRCh38-Chr1:160816871-160816918 rs560681-G	Alt	TCCATCTCTGTTTACTCAGGTCACAGGACCTTGGGGCCTCCAAGAGTT	T	C	C	A	T	C	T	C	T	G	T	T	T	A	C	T	C	A	G	G	T	C	A	C	A	G	G	A	C	C	T	T	G	G	G	G	C	C	T	C	C	A	A	G	A	G
rs560681	GRCh38-Chr1:160816871-160816918 rs201654817-C; rs560681-A	1	TCCATCCCTATTTACTCAGGTCACAGGACCTTGGGGCCTCCAAGAGTT	T	C	C	A	T	C	C	C	T	A	T	T	T	A	C	T	C	A	G	G	T	C	A	C	A	G	G	A	C	C	T	T	G	G	G	G	C	C	T	C	C	A	A	G	A	G
rs560681	GRCh38-Chr1:160816871-160816918 rs755874501-T; rs560681-A	1	TCCATTTCTATTTACTCAGGTCACAGGACCTTGGGGCCTCCAAGAGTT	T	C	C	A	T	T	T	C	T	A	T	T	T	A	C	T	C	A	G	G	T	C	A	C	A	G	G	A	C	C	T	T	G	G	G	G	C	C	T	C	C	A	A	G	A	G
				160816871	160816872	160816873	160816874	160816875	160816876	160816877	160816878	160816879	160816880	160816881	160816882	160816883	160816884	160816885	160816886	160816887	160816888	160816889	160816890	160816891	160816892	160816893	160816894	160816895	160816896	160816897	160816898	160816899	160816900	160816901	160816902	160816903	160816904	160816905	160816906	160816907	160816908	160816909	160816910	160816911	160816912	160816913	160816914	160816915	160816916
																				rs1572229195											rs1294331
rs1294331	GRCh38-Chr1:233312640-233312670 rs1294331-C	Ref	CAAAAATTCAATAAAAATCCATAACTACACT	C	A	A	A	A	A	T	T	C	A	A	T	A	A	A	A	A	T	C	C	A	T	A	A	C	T	A	C	A	C	T
rs1294331	GRCh38-Chr1:233312640-233312670 rs1294331-T	Alt	CAAAAATTCAATAAAAATCCATAACTATACT	C	A	A	A	A	A	T	T	C	A	A	T	A	A	A	A	A	T	C	C	A	T	A	A	C	T	A	T	A	C	T
rs1294331	GRCh38-Chr1:233312640-233312670 rs1572229195-T; rs1294331-C	1	CAAAAATTCAATAAAATTCCATAACTACACT	C	A	A	A	A	A	T	T	C	A	A	T	A	A	A	A	T	T	C	C	A	T	A	A	C	T	A	C	A	C	T
				233312640	233312641	233312642	233312643	233312644	233312645	233312646	233312647	233312648	233312649	233312650	233312651	233312652	233312653	233312654	233312655	233312656	233312657	233312658	233312659	233312660	233312661	233312662	233312663	233312664	233312665	233312666	233312667	233312668	233312669	233312670
rs10495407	GRCh38-Chr1:238275955-238276021 rs10495407-G	Ref	TCTGCTTCTGGAGATCTCCACTTCCTCTTGGTTGCATTGGATTCTCATTGAAAGTCCTATTCCATTC	T	C	T	G	C	T	T	C	T	G	G	A	G	A	T	C	T	C	C	A	C	T	T	C	C	T	C	T	T	G	G	T	T	G	C	A	T	T	G	G	A	T	T	C	T	C
rs10495407	GRCh38-Chr1:238275955-238276021 rs10495407-A	Alt	TCTGCTTCTGGAGATCTCCACTTCCTCTTGGTTGCATTGGATTCTCATTGAAAATCCTATTCCATTC	T	C	T	G	C	T	T	C	T	G	G	A	G	A	T	C	T	C	C	A	C	T	T	C	C	T	C	T	T	G	G	T	T	G	C	A	T	T	G	G	A	T	T	C	T	C
rs10495407	GRCh38-Chr1:238275955-238276021 rs10495407-G; rs573470824-T	2	TCTGCTTCTGGAGATCTCCACTTCCTCTTGGTTGCATTGGATTCTCATTGAAAGTCCTATTTCATTC	T	C	T	G	C	T	T	C	T	G	G	A	G	A	T	C	T	C	C	A	C	T	T	C	C	T	C	T	T	G	G	T	T	G	C	A	T	T	G	G	A	T	T	C	T	C
				238275955	238275956	238275957	238275958	238275959	238275960	238275961	238275962	238275963	238275964	238275965	238275966	238275967	238275968	238275969	238275970	238275971	238275972	238275973	238275974	238275975	238275976	238275977	238275978	238275979	238275980	238275981	238275982	238275983	238275984	238275985	238275986	238275987	238275988	238275989	238275990	238275991	238275992	238275993	238275994	238275995	238275996	238275997	238275998	238275999	238276000
															rs1109037																															rs183533496
rs1109037	GRCh38-Chr2:9945582-9945659 rs1109037-G	Ref	CCAGTTTCTCCGGAGTGGAAAGACTTTCATCTCGCACTGGCACGACCTTGAGACCCCGGGTTCTGATGAACTGGGGGG	C	C	A	G	T	T	T	C	T	C	C	G	G	A	G	T	G	G	A	A	A	G	A	C	T	T	T	C	A	T	C	T	C	G	C	A	C	T	G	G	C	A	C	G	A	C
rs1109037	GRCh38-Chr2:9945582-9945659 rs1109037-A	Alt	CCAGTTTCTCCAGAGTGGAAAGACTTTCATCTCGCACTGGCACGACCTTGAGACCCCGGGTTCTGATGAACTGGGGGG	C	C	A	G	T	T	T	C	T	C	C	A	G	A	G	T	G	G	A	A	A	G	A	C	T	T	T	C	A	T	C	T	C	G	C	A	C	T	G	G	C	A	C	G	A	C
rs1109037	GRCh38-Chr2:9945582-9945659 rs1109037-G; rs183533496-T; rs1109038-A	1	CCAGTTTCTCCGGAGTGGAAAGACTTTCATCTCGCACTGGCATGACCTTGAGACCCCGGGTTCTGATGAACTGGGAGG	C	C	A	G	T	T	T	C	T	C	C	G	G	A	G	T	G	G	A	A	A	G	A	C	T	T	T	C	A	T	C	T	C	G	C	A	C	T	G	G	C	A	T	G	A	C
				9945582	9945583	9945584	9945585	9945586	9945587	9945588	9945589	9945590	9945591	9945592	9945593	9945594	9945595	9945596	9945597	9945598	9945599	9945600	9945601	9945602	9945603	9945604	9945605	9945606	9945607	9945608	9945609	9945610	9945611	9945612	9945613	9945614	9945615	9945616	9945617	9945618	9945619	9945620	9945621	9945622	9945623	9945624	9945625	9945626	9945627
																															rs879387931
rs993934	GRCh38-Chr2:123351571-123351640 rs993934-A	Ref	TTTGCTTTGTAAGGCAATAGAGCAAAGTATTGTGATAACAGTCTCCAGAGTATATTAGCTTAGTTCATAA	T	T	T	G	C	T	T	T	G	T	A	A	G	G	C	A	A	T	A	G	A	G	C	A	A	A	G	T	A	T	T	G	T	G	A	T	A	A	C	A	G	T	C	T	C	C
rs993934	GRCh38-Chr2:123351571-123351640 rs993934-G	Alt	TTTGCTTTGTAAGGCAATAGAGCAAAGTATTGTGATAACAGTCTCCAGAGTATATTAGCTTAGTTCGTAA	T	T	T	G	C	T	T	T	G	T	A	A	G	G	C	A	A	T	A	G	A	G	C	A	A	A	G	T	A	T	T	G	T	G	A	T	A	A	C	A	G	T	C	T	C	C
rs993934	GRCh38-Chr2:123351571-123351640 rs879387931-A; rs993934-A	1	TTTGCTTTGTAAGGCAATAGAGCAAAGAATTGTGATAACAGTCTCCAGAGTATATTAGCTTAGTTCATAA	T	T	T	G	C	T	T	T	G	T	A	A	G	G	C	A	A	T	A	G	A	G	C	A	A	A	G	A	A	T	T	G	T	G	A	T	A	A	C	A	G	T	C	T	C	C
				123351571	123351572	123351573	123351574	123351575	123351576	123351577	123351578	123351579	123351580	123351581	123351582	123351583	123351584	123351585	123351586	123351587	123351588	123351589	123351590	123351591	123351592	123351593	123351594	123351595	123351596	123351597	123351598	123351599	123351600	123351601	123351602	123351603	123351604	123351605	123351606	123351607	123351608	123351609	123351610	123351611	123351612	123351613	123351614	123351615	123351616
							rs375617532															rs72883670																					rs12997453
rs12997453	GRCh38-Chr2:181548493-181548547 rs12997453-A	Ref	TTTTATGCTTTAAAGATACAGGTTATCTGTATTACATTGAGTTTTTACCTACCTT	T	T	T	T	A	T	G	C	T	T	T	A	A	A	G	A	T	A	C	A	G	G	T	T	A	T	C	T	G	T	A	T	T	A	C	A	T	T	G	A	G	T	T	T	T	T
rs12997453	GRCh38-Chr2:181548493-181548547 rs12997453-G	Alt	TTTTATGCTTTAAAGATACAGGTTATCTGTATTACATTGGGTTTTTACCTACCTT	T	T	T	T	A	T	G	C	T	T	T	A	A	A	G	A	T	A	C	A	G	G	T	T	A	T	C	T	G	T	A	T	T	A	C	A	T	T	G	G	G	T	T	T	T	T
rs12997453	GRCh38-Chr2:181548493-181548547 rs375617532-C; rs72883670-T; rs12997453-A	2	TTTCATGCTTTAAAGATATAGGTTATCTGTATTACATTGAGTTTTTACCTACCTT	T	T	T	C	A	T	G	C	T	T	T	A	A	A	G	A	T	A	T	A	G	G	T	T	A	T	C	T	G	T	A	T	T	A	C	A	T	T	G	A	G	T	T	T	T	T
				181548493	181548494	181548495	181548496	181548497	181548498	181548499	181548500	181548501	181548502	181548503	181548504	181548505	181548506	181548507	181548508	181548509	181548510	181548511	181548512	181548513	181548514	181548515	181548516	181548517	181548518	181548519	181548520	181548521	181548522	181548523	181548524	181548525	181548526	181548527	181548528	181548529	181548530	181548531	181548532	181548533	181548534	181548535	181548536	181548537	181548538
																		rs907100																		rs11689319				rs1428070270
rs907100	GRCh38-Chr2:238654924-238654989 rs907100-G	Ref	TGATGCCCTGGCATGAAAGAAGGCTCCAACTGGGCTTCTTTTCTGTGTTTTCCAAGGCTTGGAAAG	T	G	A	T	G	C	C	C	T	G	G	C	A	T	G	A	A	A	G	A	A	G	G	C	T	C	C	A	A	C	T	G	G	G	C	T	T	C	T	T	T	T	C	T	G	T
rs907100	GRCh38-Chr2:238654924-238654989 rs907100-C	Alt	TGATGCCCTGGCATCAAAGAAGGCTCCAACTGGGCTTCTTTTCTGTGTTTTCCAAGGCTTGGAAAG	T	G	A	T	G	C	C	C	T	G	G	C	A	T	C	A	A	A	G	A	A	G	G	C	T	C	C	A	A	C	T	G	G	G	C	T	T	C	T	T	T	T	C	T	G	T
rs907100	GRCh38-Chr2:238654924-238654989 rs907100-C; rs11689319-A; rs1428070270-G	1	TGATGCCCTGGCATCAAAGAAGGCTCCAACTGAGCTGCTTTTCTGTGTTTTCCAAGGCTTGGAAAG	T	G	A	T	G	C	C	C	T	G	G	C	A	T	C	A	A	A	G	A	A	G	G	C	T	C	C	A	A	C	T	G	A	G	C	T	G	C	T	T	T	T	C	T	G	T
				238654924	238654925	238654926	238654927	238654928	238654929	238654930	238654931	238654932	238654933	238654934	238654935	238654936	238654937	238654938	238654939	238654940	238654941	238654942	238654943	238654944	238654945	238654946	238654947	238654948	238654949	238654950	238654951	238654952	238654953	238654954	238654955	238654956	238654957	238654958	238654959	238654960	238654961	238654962	238654963	238654964	238654965	238654966	238654967	238654968	238654969
															ss2137544435																					rs535295485
rs1357617	GRCh38-Chr3:920039-920107 rs1357617-A	Ref	GAATTGAAAAGCCCAATTAGAGATTAGAATAGGGATAGCTGATAAGAAACATGACCAAGCACCCCAAAT	G	A	A	T	T	G	A	A	A	A	G	C	C	C	A	A	T	T	A	G	A	G	A	T	T	A	G	A	A	T	A	G	G	G	A	T	A	G	C	T	G	A	T	A	A	G
rs1357617	GRCh38-Chr3:920039-920107 rs1357617-T	Alt	GAATTGAAAAGCCCAATTAGAGATTAGAATAGGGATAGCTGATAAGAAACATGACCAAGCTCCCCAAAT	G	A	A	T	T	G	A	A	A	A	G	C	C	C	A	A	T	T	A	G	A	G	A	T	T	A	G	A	A	T	A	G	G	G	A	T	A	G	C	T	G	A	T	A	A	G
rs1357617	GRCh38-Chr3:920039-920107 rs535295485-A; rs1357617-T	3	GAATTGAAAAGCCCAATTAGAGATTAGAATAGAGATAGCTGATAAGAAACATGACCAAGCTCCCCAAAT	G	A	A	T	T	G	A	A	A	A	G	C	C	C	A	A	T	T	A	G	A	G	A	T	T	A	G	A	A	T	A	G	A	G	A	T	A	G	C	T	G	A	T	A	A	G
rs1357617	GRCh38-Chr3:920039-920107 ss2137544435-T; rs1357617-T	1	GAATTGAAAAGTCCAATTAGAGATTAGAATAGGGATAGCTGATAAGAAACATGACCAAGCTCCCCAAAT	G	A	A	T	T	G	A	A	A	A	G	T	C	C	A	A	T	T	A	G	A	G	A	T	T	A	G	A	A	T	A	G	G	G	A	T	A	G	C	T	G	A	T	A	A	G
				920039	920040	920041	920042	920043	920044	920045	920046	920047	920048	920049	920050	920051	920052	920053	920054	920055	920056	920057	920058	920059	920060	920061	920062	920063	920064	920065	920066	920067	920068	920069	920070	920071	920072	920073	920074	920075	920076	920077	920078	920079	920080	920081	920082	920083	920084
					rs2399334																																					rs2399333
rs2399332	GRCh38-Chr3:110582177-110582286 rs2399332-T	Ref	ACTGGGTTTTGATTTACATTTCTCTCATGATTAGTGACGTTGAACATTTTTTCAAGTTTGTTGGCTTCTTTTGAGAAGTATCTGTTCATGTATTTTGCTGATTTTTTAAT	A	C	T	G	G	G	T	T	T	T	G	A	T	T	T	A	C	A	T	T	T	C	T	C	T	C	A	T	G	A	T	T	A	G	T	G	A	C	G	T	T	G	A	A	C	A
rs2399332	GRCh38-Chr3:110582177-110582286 rs2399332-G	Alt	ACTGGGTTTTGATTTACATTTCTCTCATGATTAGTGACGTTGAACATTTTTTCAAGTTTGTTGGCTTCTTTTGAGAAGTATCTGTTCATGTATTTTGCTGATGTTTTAAT	A	C	T	G	G	G	T	T	T	T	G	A	T	T	T	A	C	A	T	T	T	C	T	C	T	C	A	T	G	A	T	T	A	G	T	G	A	C	G	T	T	G	A	A	C	A
rs2399332	GRCh38-Chr3:110582177-110582286 rs2399334-T; rs2399332-G	2	ATTGGGTTTTGATTTACATTTCTCTCATGATTAGTGACGTTGAACATTTTTTCAAGTTTGTTGGCTTCTTTTGAGAAGTATCTGTTCATGTATTTTGCTGATGTTTTAAT	A	T	T	G	G	G	T	T	T	T	G	A	T	T	T	A	C	A	T	T	T	C	T	C	T	C	A	T	G	A	T	T	A	G	T	G	A	C	G	T	T	G	A	A	C	A
rs2399332	GRCh38-Chr3:110582177-110582286 rs2399333-A; rs2399332-T	1	ACTGGGTTTTGATTTACATTTCTCTCATGATTAGTGACATTGAACATTTTTTCAAGTTTGTTGGCTTCTTTTGAGAAGTATCTGTTCATGTATTTTGCTGATTTTTTAAT	A	C	T	G	G	G	T	T	T	T	G	A	T	T	T	A	C	A	T	T	T	C	T	C	T	C	A	T	G	A	T	T	A	G	T	G	A	C	A	T	T	G	A	A	C	A
				110582177	110582178	110582179	110582180	110582181	110582182	110582183	110582184	110582185	110582186	110582187	110582188	110582189	110582190	110582191	110582192	110582193	110582194	110582195	110582196	110582197	110582198	110582199	110582200	110582201	110582202	110582203	110582204	110582205	110582206	110582207	110582208	110582209	110582210	110582211	110582212	110582213	110582214	110582215	110582216	110582217	110582218	110582219	110582220	110582221	110582222
														rs1331383921
rs1355366	GRCh38-Chr3:191088272-191088347 rs1355366-T	Ref	ATCCAGCTGGCACATGTGCTTAGGCCACAACTGGCTTTGGCAAGTCCTCATCCTCGAGGCCTCCAGTGGCTCTGAA	A	T	C	C	A	G	C	T	G	G	C	A	C	A	T	G	T	G	C	T	T	A	G	G	C	C	A	C	A	A	C	T	G	G	C	T	T	T	G	G	C	A	A	G	T	C
rs1355366	GRCh38-Chr3:191088272-191088347 rs1355366-C	Alt	ATCCAGCTGGCACATGTGCTTAGGCCACAACTGGCTTTGGCAAGTCCCCATCCTCGAGGCCTCCAGTGGCTCTGAA	A	T	C	C	A	G	C	T	G	G	C	A	C	A	T	G	T	G	C	T	T	A	G	G	C	C	A	C	A	A	C	T	G	G	C	T	T	T	G	G	C	A	A	G	T	C
rs1355366	GRCh38-Chr3:191088272-191088347 rs1331383921; rs1355366-T	1	ATCCAGCTGGTACATGTGCTTAGGCCACAACTGGCTTTGGCAAGTCCTCATCCTCGAGGCCTCCAGTGGCTCTGAA	A	T	C	C	A	G	C	T	G	G	T	A	C	A	T	G	T	G	C	T	T	A	G	G	C	C	A	C	A	A	C	T	G	G	C	T	T	T	G	G	C	A	A	G	T	C
				191088272	191088273	191088274	191088275	191088276	191088277	191088278	191088279	191088280	191088281	191088282	191088283	191088284	191088285	191088286	191088287	191088288	191088289	191088290	191088291	191088292	191088293	191088294	191088295	191088296	191088297	191088298	191088299	191088300	191088301	191088302	191088303	191088304	191088305	191088306	191088307	191088308	191088309	191088310	191088311	191088312	191088313	191088314	191088315	191088316	191088317
rs6811238	GRCh38-Chr4:168742417-168742480 rs6811238-T	Ref	CACTGAGAGGAGAAGACTGTGTGTTTTAAAGCCAGGTTTGTTTAAAGTGTTATGATAGTATTAA	C	A	C	T	G	A	G	A	G	G	A	G	A	A	G	A	C	T	G	T	G	T	G	T	T	T	T	A	A	A	G	C	C	A	G	G	T	T	T	G	T	T	T	A	A	A
rs6811238	GRCh38-Chr4:168742417-168742480 rs6811238-G	Alt	CACTGAGAGGAGAAGACTGTGTGTTTTAAAGCCAGGTTTGTTTAAAGGGTTATGATAGTATTAA	C	A	C	T	G	A	G	A	G	G	A	G	A	A	G	A	C	T	G	T	G	T	G	T	T	T	T	A	A	A	G	C	C	A	G	G	T	T	T	G	T	T	T	A	A	A
rs6811238	GRCh38-Chr4:168742417-168742480 rs6811238-G; rs950320966-T	1	CACTGAGAGGAGAAGACTGTGTGTTTTAAAGCCAGGTTTGTTTAAAGGGTTATGTTAGTATTAA	C	A	C	T	G	A	G	A	G	G	A	G	A	A	G	A	C	T	G	T	G	T	G	T	T	T	T	A	A	A	G	C	C	A	G	G	T	T	T	G	T	T	T	A	A	A
				168742417	168742418	168742419	168742420	168742421	168742422	168742423	168742424	168742425	168742426	168742427	168742428	168742429	168742430	168742431	168742432	168742433	168742434	168742435	168742436	168742437	168742438	168742439	168742440	168742441	168742442	168742443	168742444	168742445	168742446	168742447	168742448	168742449	168742450	168742451	168742452	168742453	168742454	168742455	168742456	168742457	168742458	168742459	168742460	168742461	168742462
																					rs1046373407																									rs1979255
rs1979255	GRCh38-Chr4:189396884-189396929 rs1979255-C	Ref	TAGCTTGTGTTGGTCAGGGCATGGAACGTTGGAACTCTTGCTCATC	T	A	G	C	T	T	G	T	G	T	T	G	G	T	C	A	G	G	G	C	A	T	G	G	A	A	C	G	T	T	G	G	A	A	C	T	C	T	T	G	C	T	C	A	T	C
rs1979255	GRCh38-Chr4:189396884-189396929 rs1979255-G	Alt	TAGCTTGTGTTGGTCAGGGCATGGAACGTTGGAACTCTTGCTGATC	T	A	G	C	T	T	G	T	G	T	T	G	G	T	C	A	G	G	G	C	A	T	G	G	A	A	C	G	T	T	G	G	A	A	C	T	C	T	T	G	C	T	G	A	T	C
rs1979255	GRCh38-Chr4:189396884-189396929 rs1046373407-A; rs1979255-G	1	TAGCTTGTGTTGGTCAGAGCATGGAACGTTGGAACTCTTGCTGATC	T	A	G	C	T	T	G	T	G	T	T	G	G	T	C	A	G	A	G	C	A	T	G	G	A	A	C	G	T	T	G	G	A	A	C	T	C	T	T	G	C	T	G	A	T	C
				189396884	189396885	189396886	189396887	189396888	189396889	189396890	189396891	189396892	189396893	189396894	189396895	189396896	189396897	189396898	189396899	189396900	189396901	189396902	189396903	189396904	189396905	189396906	189396907	189396908	189396909	189396910	189396911	189396912	189396913	189396914	189396915	189396916	189396917	189396918	189396919	189396920	189396921	189396922	189396923	189396924	189396925	189396926	189396927	189396928	189396929
																																								rs717302							rs1458228026
rs717302	GRCh38-Chr5:2879245-2879308 rs717302-G	Ref	AATAAGCTTTAGAAAGGCATATCGTATTAACTGTGTGGTGAACGTCTGTCATTAGGTTTAGCTC	A	A	T	A	A	G	C	T	T	T	A	G	A	A	A	G	G	C	A	T	A	T	C	G	T	A	T	T	A	A	C	T	G	T	G	T	G	G	T	G	A	A	C	G	T	C
rs717302	GRCh38-Chr5:2879245-2879308 rs717302-A	Alt	AATAAGCTTTAGAAAGGCATATCGTATTAACTGTGTAGTGAACGTCTGTCATTAGGTTTAGCTC	A	A	T	A	A	G	C	T	T	T	A	G	A	A	A	G	G	C	A	T	A	T	C	G	T	A	T	T	A	A	C	T	G	T	G	T	A	G	T	G	A	A	C	G	T	C
rs717302	GRCh38-Chr5:2879245-2879308 rs717302-G; rs1458228026-A	1	AATAAGCTTTAGAAAGGCATATCGTATTAACTGTGTGGTGAACATCTGTCATTAGGTTTAGCTC	A	A	T	A	A	G	C	T	T	T	A	G	A	A	A	G	G	C	A	T	A	T	C	G	T	A	T	T	A	A	C	T	G	T	G	T	G	G	T	G	A	A	C	A	T	C
				2879245	2879246	2879247	2879248	2879249	2879250	2879251	2879252	2879253	2879254	2879255	2879256	2879257	2879258	2879259	2879260	2879261	2879262	2879263	2879264	2879265	2879266	2879267	2879268	2879269	2879270	2879271	2879272	2879273	2879274	2879275	2879276	2879277	2879278	2879279	2879280	2879281	2879282	2879283	2879284	2879285	2879286	2879287	2879288	2879289	2879290
																																rs159606
rs159606	GRCh38-Chr5:17374761-17374814 rs159606-A	Ref	GTTTCTCATCCTGTTATTATTTGTTTACATCTGTCTCCTATATTTTATTCTCTC	G	T	T	T	C	T	C	A	T	C	C	T	G	T	T	A	T	T	A	T	T	T	G	T	T	T	A	C	A	T	C	T	G	T	C	T	C	C	T	A	T	A	T	T	T	T
rs159606	GRCh38-Chr5:17374761-17374814 rs159606-G	Alt	GTTTCTCATCCTGTTATTATTTGTTTACGTCTGTCTCCTATATTTTATTCTCTC	G	T	T	T	C	T	C	A	T	C	C	T	G	T	T	A	T	T	A	T	T	T	G	T	T	T	A	C	G	T	C	T	G	T	C	T	C	C	T	A	T	A	T	T	T	T
rs159606	GRCh38-Chr5:17374761-17374814 rs159606-A; rs576005112-T	1	GTTTCTCATCCTGTTATTATTTGTTTACATCTGTCTCCTATATTTTATTTTCTC	G	T	T	T	C	T	C	A	T	C	C	T	G	T	T	A	T	T	A	T	T	T	G	T	T	T	A	C	A	T	C	T	G	T	C	T	C	C	T	A	T	A	T	T	T	T
				17374761	17374762	17374763	17374764	17374765	17374766	17374767	17374768	17374769	17374770	17374771	17374772	17374773	17374774	17374775	17374776	17374777	17374778	17374779	17374780	17374781	17374782	17374783	17374784	17374785	17374786	17374787	17374788	17374789	17374790	17374791	17374792	17374793	17374794	17374795	17374796	17374797	17374798	17374799	17374800	17374801	17374802	17374803	17374804	17374805	17374806
																							rs1220236942
rs13182883	GRCh38-Chr5:137297586-137297711 rs13182883-G	Ref	TGAGGGGAGGGGTCCCTTCTGGCCTAGTAGAGGGCCTGGCCTGCAGTGAGCATTCAAATCCTCGAGGAACAGGGTGGGGAGGTGGGACAAAGGCAGGAAGAAAGTAACGGAGAGCCTGGGGAGACA	T	G	A	G	G	G	G	A	G	G	G	G	T	C	C	C	T	T	C	T	G	G	C	C	T	A	G	T	A	G	A	G	G	G	C	C	T	G	G	C	C	T	G	C	A	G
rs13182883	GRCh38-Chr5:137297586-137297711 rs13182883-A	Alt	TGAGGGGAGGGGTCCCTTCTGGCCTAGTAGAGGGCCTGGCCTGCAGTGAGCATTCAAATCCTCAAGGAACAGGGTGGGGAGGTGGGACAAAGGCAGGAAGAAAGTAACGGAGAGCCTGGGGAGACA	T	G	A	G	G	G	G	A	G	G	G	G	T	C	C	C	T	T	C	T	G	G	C	C	T	A	G	T	A	G	A	G	G	G	C	C	T	G	G	C	C	T	G	C	A	G
rs13182883	GRCh38-Chr5:137297586-137297711 rs13182883-G; rs955356222-C	1	TGAGGGGAGGGGTCCCTTCTGGCCTAGTAGAGGGCCTGGCCTGCAGTGAGCATTCAAATCCTCGAGGAACAGGGTGGGGAGGTGGGACAAAGCCAGGAAGAAAGTAACGGAGAGCCTGGGGAGACA	T	G	A	G	G	G	G	A	G	G	G	G	T	C	C	C	T	T	C	T	G	G	C	C	T	A	G	T	A	G	A	G	G	G	C	C	T	G	G	C	C	T	G	C	A	G
rs13182883	GRCh38-Chr5:137297586-137297711 rs1220236942-C; rs13182883-G	1	TGAGGGGAGGGGTCCCTTCCGGCCTAGTAGAGGGCCTGGCCTGCAGTGAGCATTCAAATCCTCGAGGAACAGGGTGGGGAGGTGGGACAAAGGCAGGAAGAAAGTAACGGAGAGCCTGGGGAGACA	T	G	A	G	G	G	G	A	G	G	G	G	T	C	C	C	T	T	C	C	G	G	C	C	T	A	G	T	A	G	A	G	G	G	C	C	T	G	G	C	C	T	G	C	A	G
				137297586	137297587	137297588	137297589	137297590	137297591	137297592	137297593	137297594	137297595	137297596	137297597	137297598	137297599	137297600	137297601	137297602	137297603	137297604	137297605	137297606	137297607	137297608	137297609	137297610	137297611	137297612	137297613	137297614	137297615	137297616	137297617	137297618	137297619	137297620	137297621	137297622	137297623	137297624	137297625	137297626	137297627	137297628	137297629	137297630	137297631
																																									rs951976525	rs251934
rs251934	GRCh38-Chr5:175351637-175351691 rs251934-A	Ref	GTCTGGGGCAGATGAAGTAGTAGATATCTGGCTGTCCCATCTACTTAAAAGCCTC	G	T	C	T	G	G	G	G	C	A	G	A	T	G	A	A	G	T	A	G	T	A	G	A	T	A	T	C	T	G	G	C	T	G	T	C	C	C	A	T	C	T	A	C	T	T
rs251934	GRCh38-Chr5:175351637-175351691 rs251934-G	Alt	GTCTGGGGCAGATGAAGTAGTAGATATCTGGCTGTCCCGTCTACTTAAAAGCCTC	G	T	C	T	G	G	G	G	C	A	G	A	T	G	A	A	G	T	A	G	T	A	G	A	T	A	T	C	T	G	G	C	T	G	T	C	C	C	G	T	C	T	A	C	T	T
rs251934	GRCh38-Chr5:175351637-175351691 rs951976525-T; rs251934-G	1	GTCTGGGGCAGATGAAGTAGTAGATATCTGGCTGTCCTGTCTACTTAAAAGCCTC	G	T	C	T	G	G	G	G	C	A	G	A	T	G	A	A	G	T	A	G	T	A	G	A	T	A	T	C	T	G	G	C	T	G	T	C	C	T	G	T	C	T	A	C	T	T
				175351637	175351638	175351639	175351640	175351641	175351642	175351643	175351644	175351645	175351646	175351647	175351648	175351649	175351650	175351651	175351652	175351653	175351654	175351655	175351656	175351657	175351658	175351659	175351660	175351661	175351662	175351663	175351664	175351665	175351666	175351667	175351668	175351669	175351670	175351671	175351672	175351673	175351674	175351675	175351676	175351677	175351678	175351679	175351680	175351681	175351682
										rs13218440
rs13218440	GRCh38-Chr6:12059715-12059838 rs13218440-G	Ref	CCTCTGGGCAGCCTCCTGGAATACTCAGCTGGGATGGGTTGGGGCTGCTTGAGGTACAGCTCCCACTGCCTCTGAGTGGCCCTCCATGAAAATGCCTCATGTCTCTGTGTCCCTAAACTGTAGG	C	C	T	C	T	G	G	G	C	A	G	C	C	T	C	C	T	G	G	A	A	T	A	C	T	C	A	G	C	T	G	G	G	A	T	G	G	G	T	T	G	G	G	G	C	T
rs13218440	GRCh38-Chr6:12059715-12059838 rs13218440-A	Alt	CCTCTGAGCAGCCTCCTGGAATACTCAGCTGGGATGGGTTGGGGCTGCTTGAGGTACAGCTCCCACTGCCTCTGAGTGGCCCTCCATGAAAATGCCTCATGTCTCTGTGTCCCTAAACTGTAGG	C	C	T	C	T	G	A	G	C	A	G	C	C	T	C	C	T	G	G	A	A	T	A	C	T	C	A	G	C	T	G	G	G	A	T	G	G	G	T	T	G	G	G	G	C	T
rs13218440	GRCh38-Chr6:12059715-12059838 rs13218440-G; ss5982134728-T	1	CCTCTGGGCAGCCTCCTGGAATACTCAGCTGGGATGGGTTGGGGCTGCTTGAGGTACAGCTCCCACTGCCTCTGAGTGGCCCTCCATGAAAATGCCTCATGTCTCTGTGTCCCTAAACTTTAGG	C	C	T	C	T	G	G	G	C	A	G	C	C	T	C	C	T	G	G	A	A	T	A	C	T	C	A	G	C	T	G	G	G	A	T	G	G	G	T	T	G	G	G	G	C	T
				12059715	12059716	12059717	12059718	12059719	12059720	12059721	12059722	12059723	12059724	12059725	12059726	12059727	12059728	12059729	12059730	12059731	12059732	12059733	12059734	12059735	12059736	12059737	12059738	12059739	12059740	12059741	12059742	12059743	12059744	12059745	12059746	12059747	12059748	12059749	12059750	12059751	12059752	12059753	12059754	12059755	12059756	12059757	12059758	12059759	12059760
				rs540177118	del CT
rs1336071	GRCh38-Chr6:93827491-93827549 rs1336071-T	Ref	CTGTTTTGTCCATCTGAAATTCTAATTTTTCTTATCTTTGTTTTAATCTGATGCTTTTT	C	T	G	T	T	T	T	G	T	C	C	A	T	C	T	G	A	A	A	T	T	C	T	A	A	T	T	T	T	T	C	T	T	A	T	C	T	T	T	G	T	T	T	T	A	A
rs1336071	GRCh38-Chr6:93827491-93827549 rs1336071-C	Alt	CTGTTTTGTCCATCTGAAATTCTAATTTTTCTTATCTTTGTTTTAACCTGATGCTTTTT	C	T	G	T	T	T	T	G	T	C	C	A	T	C	T	G	A	A	A	T	T	C	T	A	A	T	T	T	T	T	C	T	T	A	T	C	T	T	T	G	T	T	T	T	A	A
rs1336071	GRCh38-Chr6:93827491-93827549 rs1336071-T; rs569461464-A	1	CTGTTTTGTCCATCTGAAATTCTAATTTTTCTTATCTTTGTTTTAATCTGATGATTTTT	C	T	G	T	T	T	T	G	T	C	C	A	T	C	T	G	A	A	A	T	T	C	T	A	A	T	T	T	T	T	C	T	T	A	T	C	T	T	T	G	T	T	T	T	A	A
rs1336071	GRCh38-Chr6:93827491-93827549 rs540177118-DEL_CT; rs1336071-C	2	GTTTTGTCCATCTGAAATTCTAATTTTTCTTATCTTTGTTTTAACCTGATGCTTTTT	-	-	G	T	T	T	T	G	T	C	C	A	T	C	T	G	A	A	A	T	T	C	T	A	A	T	T	T	T	T	C	T	T	A	T	C	T	T	T	G	T	T	T	T	A	A
				93827491	93827492	93827493	93827494	93827495	93827496	93827497	93827498	93827499	93827500	93827501	93827502	93827503	93827504	93827505	93827506	93827507	93827508	93827509	93827510	93827511	93827512	93827513	93827514	93827515	93827516	93827517	93827518	93827519	93827520	93827521	93827522	93827523	93827524	93827525	93827526	93827527	93827528	93827529	93827530	93827531	93827532	93827533	93827534	93827535	93827536
															rs763869																	rs1027299221
rs763869	GRCh38-Chr8:1427433-1427467 rs763869-G	Ref	AATGTAATGCAGTTGAGTTAGAAATAATATAAACA	A	A	T	G	T	A	A	T	G	C	A	G	T	T	G	A	G	T	T	A	G	A	A	A	T	A	A	T	A	T	A	A	A	C	A
rs763869	GRCh38-Chr8:1427433-1427467 rs763869-A	Alt	AATGTAATGCAATTGAGTTAGAAATAATATAAACA	A	A	T	G	T	A	A	T	G	C	A	A	T	T	G	A	G	T	T	A	G	A	A	A	T	A	A	T	A	T	A	A	A	C	A
rs763869	GRCh38-Chr8:1427433-1427467 rs763869-A; rs1027299221-G	1	AATGTAATGCAATTGAGTTAGAAATAATGTAAACA	A	A	T	G	T	A	A	T	G	C	A	A	T	T	G	A	G	T	T	A	G	A	A	A	T	A	A	T	G	T	A	A	A	C	A
				1427433	1427434	1427435	1427436	1427437	1427438	1427439	1427440	1427441	1427442	1427443	1427444	1427445	1427446	1427447	1427448	1427449	1427450	1427451	1427452	1427453	1427454	1427455	1427456	1427457	1427458	1427459	1427460	1427461	1427462	1427463	1427464	1427465	1427466	1427467
													rs10092491	rs1306110296	del T																															rs972721450
rs10092491	GRCh38-Chr8:28553546-28553610 rs10092491-T	Ref	AAACTGAAGTTTTCCTTATAGAGATTTATCCTAGTTAGTTTGCGGGGATACTGGTTGGGCCGAAA	A	A	A	C	T	G	A	A	G	T	T	T	T	C	C	T	T	A	T	A	G	A	G	A	T	T	T	A	T	C	C	T	A	G	T	T	A	G	T	T	T	G	C	G	G	G
rs10092491	GRCh38-Chr8:28553546-28553610 rs10092491-C	Alt	AAACTGAAGCTTTCCTTATAGAGATTTATCCTAGTTAGTTTGCGGGGATACTGGTTGGGCCGAAA	A	A	A	C	T	G	A	A	G	C	T	T	T	C	C	T	T	A	T	A	G	A	G	A	T	T	T	A	T	C	C	T	A	G	T	T	A	G	T	T	T	G	C	G	G	G
rs10092491	GRCh38-Chr8:28553546-28553610 rs10092491-T; rs972721450-T	2	AAACTGAAGTTTTCCTTATAGAGATTTATCCTAGTTAGTTTGTGGGGATACTGGTTGGGCCGAAA	A	A	A	C	T	G	A	A	G	T	T	T	T	C	C	T	T	A	T	A	G	A	G	A	T	T	T	A	T	C	C	T	A	G	T	T	A	G	T	T	T	G	T	G	G	G
rs10092491	GRCh38-Chr8:28553546-28553610 rs10092491-C; rs1306110296-DEL_T	1	AAACTGAAGCTTCCTTATAGAGATTTATCCTAGTTAGTTTGCGGGGATACTGGTTGGGCCGAAA	A	A	A	C	T	G	A	A	G	C	-	T	T	C	C	T	T	A	T	A	G	A	G	A	T	T	T	A	T	C	C	T	A	G	T	T	A	G	T	T	T	G	C	G	G	G
				28553546	28553547	28553548	28553549	28553550	28553551	28553552	28553553	28553554	28553555	28553556	28553557	28553558	28553559	28553560	28553561	28553562	28553563	28553564	28553565	28553566	28553567	28553568	28553569	28553570	28553571	28553572	28553573	28553574	28553575	28553576	28553577	28553578	28553579	28553580	28553581	28553582	28553583	28553584	28553585	28553586	28553587	28553588	28553589	28553590	28553591
														rs7041158							rs1041998661	ss5982134729
rs7041158	GRCh38-Chr9:27985930-27986001 rs7041158-C	Ref	TCAATTTCCTCTCCAACCCAAGACACTTCTCACTGGAAAACTCTCACAATCACATTTATAACAAAGGAGAGG	T	C	A	A	T	T	T	C	C	T	C	T	C	C	A	A	C	C	C	A	A	G	A	C	A	C	T	T	C	T	C	A	C	T	G	G	A	A	A	A	C	T	C	T	C	A
rs7041158	GRCh38-Chr9:27985930-27986001 rs7041158-T	Alt	TCAATTTCCTTTCCAACCCAAGACACTTCTCACTGGAAAACTCTCACAATCACATTTATAACAAAGGAGAGG	T	C	A	A	T	T	T	C	C	T	T	T	C	C	A	A	C	C	C	A	A	G	A	C	A	C	T	T	C	T	C	A	C	T	G	G	A	A	A	A	C	T	C	T	C	A
rs7041158	GRCh38-Chr9:27985930-27986001 rs7041158-T; rs1041998661-G	1	TCAATTTCCTTTCCAACGCAAGACACTTCTCACTGGAAAACTCTCACAATCACATTTATAACAAAGGAGAGG	T	C	A	A	T	T	T	C	C	T	T	T	C	C	A	A	C	G	C	A	A	G	A	C	A	C	T	T	C	T	C	A	C	T	G	G	A	A	A	A	C	T	C	T	C	A
rs7041158	GRCh38-Chr9:27985930-27986001 rs7041158-C; ss5982134729-G	1	TCAATTTCCTCTCCAACCGAAGACACTTCTCACTGGAAAACTCTCACAATCACATTTATAACAAAGGAGAGG	T	C	A	A	T	T	T	C	C	T	C	T	C	C	A	A	C	C	G	A	A	G	A	C	A	C	T	T	C	T	C	A	C	T	G	G	A	A	A	A	C	T	C	T	C	A
				27985930	27985931	27985932	27985933	27985934	27985935	27985936	27985937	27985938	27985939	27985940	27985941	27985942	27985943	27985944	27985945	27985946	27985947	27985948	27985949	27985950	27985951	27985952	27985953	27985954	27985955	27985956	27985957	27985958	27985959	27985960	27985961	27985962	27985963	27985964	27985965	27985966	27985967	27985968	27985969	27985970	27985971	27985972	27985973	27985974	27985975
													ss5982134730																						rs1463729
rs1463729	GRCh38-Chr9:124119138-124119195 rs1463729-C	Ref	ATGTGCATGCTTTTGGGTGGGAATGGCTGCACGTGGCTATGAGTGTATGCTGCCAAAG	A	T	G	T	G	C	A	T	G	C	T	T	T	T	G	G	G	T	G	G	G	A	A	T	G	G	C	T	G	C	A	C	G	T	G	G	C	T	A	T	G	A	G	T	G	T
rs1463729	GRCh38-Chr9:124119138-124119195 rs1463729-T	Alt	ATGTGCATGCTTTTGGGTGGGAATGGCTGCATGTGGCTATGAGTGTATGCTGCCAAAG	A	T	G	T	G	C	A	T	G	C	T	T	T	T	G	G	G	T	G	G	G	A	A	T	G	G	C	T	G	C	A	T	G	T	G	G	C	T	A	T	G	A	G	T	G	T
rs1463729	GRCh38-Chr9:124119138-124119195 ss5982134730-T; rs1463729-T	1	ATGTGCATGTTTTTGGGTGGGAATGGCTGCATGTGGCTATGAGTGTATGCTGCCAAAG	A	T	G	T	G	C	A	T	G	T	T	T	T	T	G	G	G	T	G	G	G	A	A	T	G	G	C	T	G	C	A	T	G	T	G	G	C	T	A	T	G	A	G	T	G	T
				124119138	124119139	124119140	124119141	124119142	124119143	124119144	124119145	124119146	124119147	124119148	124119149	124119150	124119151	124119152	124119153	124119154	124119155	124119156	124119157	124119158	124119159	124119160	124119161	124119162	124119163	124119164	124119165	124119166	124119167	124119168	124119169	124119170	124119171	124119172	124119173	124119174	124119175	124119176	124119177	124119178	124119179	124119180	124119181	124119182	124119183
																													rs735155
rs735155	GRCh38-Chr10:3331961-3332088 rs735155-C	Ref	GAGTGTCACCGAATTCAACGGGAAGCCAGCAGGTCTCCCTCTCCAGCGCGGCCCAGCAGGCCTCTCCCGACCCTTCAGCGCCAGCTCTCCGGTTTTCTCCAGGTTAGGTCCCTTCTGGAGCCGGCGTC	G	A	G	T	G	T	C	A	C	C	G	A	A	T	T	C	A	A	C	G	G	G	A	A	G	C	C	A	G	C	A	G	G	T	C	T	C	C	C	T	C	T	C	C	A	G
rs735155	GRCh38-Chr10:3331961-3332088 rs735155-T	Alt	GAGTGTCACCGAATTCAACGGGAAGTCAGCAGGTCTCCCTCTCCAGCGCGGCCCAGCAGGCCTCTCCCGACCCTTCAGCGCCAGCTCTCCGGTTTTCTCCAGGTTAGGTCCCTTCTGGAGCCGGCGTC	G	A	G	T	G	T	C	A	C	C	G	A	A	T	T	C	A	A	C	G	G	G	A	A	G	T	C	A	G	C	A	G	G	T	C	T	C	C	C	T	C	T	C	C	A	G
rs735155	GRCh38-Chr10:3331961-3332088 rs735155-C; rs1446241405-G	1	GAGTGTCACCGAATTCAACGGGAAGCCAGCAGGTCTCCCTCTCCAGCGCGGCCCAGCAGGCCTCTCCCGACCCTTCAGCGCCAGCTCTCCGGTTTTCTCCAGGTGAGGTCCCTTCTGGAGCCGGCGTC	G	A	G	T	G	T	C	A	C	C	G	A	A	T	T	C	A	A	C	G	G	G	A	A	G	C	C	A	G	C	A	G	G	T	C	T	C	C	C	T	C	T	C	C	A	G
				3331961	3331962	3331963	3331964	3331965	3331966	3331967	3331968	3331969	3331970	3331971	3331972	3331973	3331974	3331975	3331976	3331977	3331978	3331979	3331980	3331981	3331982	3331983	3331984	3331985	3331986	3331987	3331988	3331989	3331990	3331991	3331992	3331993	3331994	3331995	3331996	3331997	3331998	3331999	3332000	3332001	3332002	3332003	3332004	3332005	3332006
																									rs1472107559												rs740598
rs740598	GRCh38-Chr10:116747355-116747426 rs740598-G	Ref	TCAAATAGCAATGGCTCGTCTATGGTTAGTCTCGCAGCCACATTCTCAGAACTGCTCAAACCCTGGCCCTGC	T	C	A	A	A	T	A	G	C	A	A	T	G	G	C	T	C	G	T	C	T	A	T	G	G	T	T	A	G	T	C	T	C	G	C	A	G	C	C	A	C	A	T	T	C	T
rs740598	GRCh38-Chr10:116747355-116747426 rs740598-A	Alt	TCAAATAGCAATGGCTCGTCTATGGTTAGTCTCACAGCCACATTCTCAGAACTGCTCAAACCCTGGCCCTGC	T	C	A	A	A	T	A	G	C	A	A	T	G	G	C	T	C	G	T	C	T	A	T	G	G	T	T	A	G	T	C	T	C	A	C	A	G	C	C	A	C	A	T	T	C	T
rs740598	GRCh38-Chr10:116747355-116747426 rs1472107559-G; rs740598-A	2	TCAAATAGCAATGGCTCGTCTGTGGTTAGTCTCACAGCCACATTCTCAGAACTGCTCAAACCCTGGCCCTGC	T	C	A	A	A	T	A	G	C	A	A	T	G	G	C	T	C	G	T	C	T	G	T	G	G	T	T	A	G	T	C	T	C	A	C	A	G	C	C	A	C	A	T	T	C	T
				116747355	116747356	116747357	116747358	116747359	116747360	116747361	116747362	116747363	116747364	116747365	116747366	116747367	116747368	116747369	116747370	116747371	116747372	116747373	116747374	116747375	116747376	116747377	116747378	116747379	116747380	116747381	116747382	116747383	116747384	116747385	116747386	116747387	116747388	116747389	116747390	116747391	116747392	116747393	116747394	116747395	116747396	116747397	116747398	116747399	116747400
				rs576924750				rs964681																rs929883578
rs964681	GRCh38-Chr10:130900152-130900208 rs964681-T	Ref	GACATGGGCATTTGGGGCCACAGTGCTCAGACAGCAACCTCTGGTTCTTACCAATCC	G	A	C	A	T	G	G	G	C	A	T	T	T	G	G	G	G	C	C	A	C	A	G	T	G	C	T	C	A	G	A	C	A	G	C	A	A	C	C	T	C	T	G	G	T	T
rs964681	GRCh38-Chr10:130900152-130900208 rs964681-C	Alt	GACACGGGCATTTGGGGCCACAGTGCTCAGACAGCAACCTCTGGTTCTTACCAATCC	G	A	C	A	C	G	G	G	C	A	T	T	T	G	G	G	G	C	C	A	C	A	G	T	G	C	T	C	A	G	A	C	A	G	C	A	A	C	C	T	C	T	G	G	T	T
rs964681	GRCh38-Chr10:130900152-130900208 rs964681-C; rs929883578-T	1	GACACGGGCATTTGGGGCCATAGTGCTCAGACAGCAACCTCTGGTTCTTACCAATCC	G	A	C	A	C	G	G	G	C	A	T	T	T	G	G	G	G	C	C	A	T	A	G	T	G	C	T	C	A	G	A	C	A	G	C	A	A	C	C	T	C	T	G	G	T	T
rs964681	GRCh38-Chr10:130900152-130900208 rs576924750-A rs964681-C	1	AACACGGGCATTTGGGGCCACAGTGCTCAGACAGCAACCTCTGGTTCTTACCAATCC	A	A	C	A	C	G	G	G	C	A	T	T	T	G	G	G	G	C	C	A	C	A	G	T	G	C	T	C	A	G	A	C	A	G	C	A	A	C	C	T	C	T	G	G	T	T
				130900152	130900153	130900154	130900155	130900156	130900157	130900158	130900159	130900160	130900161	130900162	130900163	130900164	130900165	130900166	130900167	130900168	130900169	130900170	130900171	130900172	130900173	130900174	130900175	130900176	130900177	130900178	130900179	130900180	130900181	130900182	130900183	130900184	130900185	130900186	130900187	130900188	130900189	130900190	130900191	130900192	130900193	130900194	130900195	130900196	130900197
																												rs2076848
rs2076848	GRCh38-Chr11:134797628-134797704 rs2076848-A	Ref	CCCGGGACCGCTTCAGGTCCATCAAGCCCTGATTTCTGGTGGTGAGGCCAGGATACCTGTGTATTATCAATAATTTC	C	C	C	G	G	G	A	C	C	G	C	T	T	C	A	G	G	T	C	C	A	T	C	A	A	G	C	C	C	T	G	A	T	T	T	C	T	G	G	T	G	G	T	G	A	G
rs2076848	GRCh38-Chr11:134797628-134797704 rs2076848-T	Alt	CCCGGGACCGCTTCAGGTCCATCATGCCCTGATTTCTGGTGGTGAGGCCAGGATACCTGTGTATTATCAATAATTTC	C	C	C	G	G	G	A	C	C	G	C	T	T	C	A	G	G	T	C	C	A	T	C	A	T	G	C	C	C	T	G	A	T	T	T	C	T	G	G	T	G	G	T	G	A	G
rs2076848	GRCh38-Chr11:134797628-134797704 rs2076848-T; rs1397453471-INS_T	1	CCCGGGACCGCTTCAGGTCCATCATGCCCTGATTTCTGGTGGTGAGGCCAGGATACCTGTGTATTATCAATTAATTTC	C	C	C	G	G	G	A	C	C	G	C	T	T	C	A	G	G	T	C	C	A	T	C	A	T	G	C	C	C	T	G	A	T	T	T	C	T	G	G	T	G	G	T	G	A	G
				134797628	134797629	134797630	134797631	134797632	134797633	134797634	134797635	134797636	134797637	134797638	134797639	134797640	134797641	134797642	134797643	134797644	134797645	134797646	134797647	134797648	134797649	134797650	134797651	134797652	134797653	134797654	134797655	134797656	134797657	134797658	134797659	134797660	134797661	134797662	134797663	134797664	134797665	134797666	134797667	134797668	134797669	134797670	134797671	134797672	134797673
																																						rs2107612											rs1943423860
rs2107612	GRCh38-Chr12:779120-779169 rs2107612-G	Ref	ACTAATTATGTGTTTTTTCTAAATCATATTGTCTGCTTTTCTCCAAAACA	A	C	T	A	A	T	T	A	T	G	T	G	T	T	T	T	T	T	C	T	A	A	A	T	C	A	T	A	T	T	G	T	C	T	G	C	T	T	T	T	C	T	C	C	A	A
rs2107612	GRCh38-Chr12:779120-779169 rs2107612-A	Alt	ACTAATTATGTGTTTTTTCTAAATCATATTGTCTACTTTTCTCCAAAACA	A	C	T	A	A	T	T	A	T	G	T	G	T	T	T	T	T	T	C	T	A	A	A	T	C	A	T	A	T	T	G	T	C	T	A	C	T	T	T	T	C	T	C	C	A	A
rs2107612	GRCh38-Chr12:779120-779169 rs2107612-A; rs1943423860-T	1	ACTAATTATGTGTTTTTTCTAAATCATATTGTCTACTTTTCTCCATAACA	A	C	T	A	A	T	T	A	T	G	T	G	T	T	T	T	T	T	C	T	A	A	A	T	C	A	T	A	T	T	G	T	C	T	A	C	T	T	T	T	C	T	C	C	A	T
				779120	779121	779122	779123	779124	779125	779126	779127	779128	779129	779130	779131	779132	779133	779134	779135	779136	779137	779138	779139	779140	779141	779142	779143	779144	779145	779146	779147	779148	779149	779150	779151	779152	779153	779154	779155	779156	779157	779158	779159	779160	779161	779162	779163	779164	779165
							rs770405898										rs2269355
rs2269355	GRCh38-Chr12:6836737-6836759 rs2269355-C	Ref	TCCCGAGTTCTCTCCACAGTCCC	T	C	C	C	G	A	G	T	T	C	T	C	T	C	C	A	C	A	G	T	C	C	C
rs2269355	GRCh38-Chr12:6836737-6836759 rs2269355-G	Alt	TCCCGAGTTCTCTGCACAGTCCC	T	C	C	C	G	A	G	T	T	C	T	C	T	G	C	A	C	A	G	T	C	C	C
rs2269355	GRCh38-Chr12:6836737-6836759 rs770405898-T; rs2269355-C	1	TCCTGAGTTCTCTCCACAGTCCC	T	C	C	T	G	A	G	T	T	C	T	C	T	C	C	A	C	A	G	T	C	C	C
				6836737	6836738	6836739	6836740	6836741	6836742	6836743	6836744	6836745	6836746	6836747	6836748	6836749	6836750	6836751	6836752	6836753	6836754	6836755	6836756	6836757	6836758	6836759
																																																rs1018126777
rs10773760	GRCh38-Chr12:130277100-130277155 rs10773760-A	Ref	TGTTAGCCGTCGGGACCAGCTTCTGTCTGGAAGTTCGTCAAATTGCAGTTAAGTCC	T	G	T	T	A	G	C	C	G	T	C	G	G	G	A	C	C	A	G	C	T	T	C	T	G	T	C	T	G	G	A	A	G	T	T	C	G	T	C	A	A	A	T	T	G	C
rs10773760	GRCh38-Chr12:130277100-130277155 rs10773760-G	Alt	TGTTAGCCGTCGGGACCAGCTTCTGTCTGGAAGTTCGTCAAATTGCAGTTAGGTCC	T	G	T	T	A	G	C	C	G	T	C	G	G	G	A	C	C	A	G	C	T	T	C	T	G	T	C	T	G	G	A	A	G	T	T	C	G	T	C	A	A	A	T	T	G	C
rs10773760	GRCh38-Chr12:130277100-130277155 rs1018126777-A; rs10773760-G	1	TGTTAGCCGTCGGGACCAGCTTCTGTCTGGAAGTTCGTCAAATTACAGTTAGGTCC	T	G	T	T	A	G	C	C	G	T	C	G	G	G	A	C	C	A	G	C	T	T	C	T	G	T	C	T	G	G	A	A	G	T	T	C	G	T	C	A	A	A	T	T	A	C
				130277100	130277101	130277102	130277103	130277104	130277105	130277106	130277107	130277108	130277109	130277110	130277111	130277112	130277113	130277114	130277115	130277116	130277117	130277118	130277119	130277120	130277121	130277122	130277123	130277124	130277125	130277126	130277127	130277128	130277129	130277130	130277131	130277132	130277133	130277134	130277135	130277136	130277137	130277138	130277139	130277140	130277141	130277142	130277143	130277144	130277145
																													rs1027587976					rs1886510						rs142721433
rs1886510	GRCh38-Chr13:21800531-21800600 rs1886510-G	Ref	TGACGCCTGGATTTTCACAACAACACTTGCGAATATTGCTTATTCTTTTAAGAATTACTAAAATTTACCC	T	G	A	C	G	C	C	T	G	G	A	T	T	T	T	C	A	C	A	A	C	A	A	C	A	C	T	T	G	C	G	A	A	T	A	T	T	G	C	T	T	A	T	T	C	T
rs1886510	GRCh38-Chr13:21800531-21800600 rs1886510-A	Alt	TGACGCCTGGATTTTCACAACAACACTTGCAAATATTGCTTATTCTTTTAAGAATTACTAAAATTTACCC	T	G	A	C	G	C	C	T	G	G	A	T	T	T	T	C	A	C	A	A	C	A	A	C	A	C	T	T	G	C	A	A	A	T	A	T	T	G	C	T	T	A	T	T	C	T
rs1886510	GRCh38-Chr13:21800531-21800600 rs1027587976-G; rs1886510-G	1	TGACGCCTGGATTTTCACAACAACAGTTGCGAATATTGCTTATTCTTTTAAGAATTACTAAAATTTACCC	T	G	A	C	G	C	C	T	G	G	A	T	T	T	T	C	A	C	A	A	C	A	A	C	A	G	T	T	G	C	G	A	A	T	A	T	T	G	C	T	T	A	T	T	C	T
rs1886510	GRCh38-Chr13:21800531-21800600 rs1886510-G; rs142721433-G	1	TGACGCCTGGATTTTCACAACAACACTTGCGAATATGGCTTATTCTTTTAAGAATTACTAAAATTTACCC	T	G	A	C	G	C	C	T	G	G	A	T	T	T	T	C	A	C	A	A	C	A	A	C	A	C	T	T	G	C	G	A	A	T	A	T	G	G	C	T	T	A	T	T	C	T
				21800531	21800532	21800533	21800534	21800535	21800536	21800537	21800538	21800539	21800540	21800541	21800542	21800543	21800544	21800545	21800546	21800547	21800548	21800549	21800550	21800551	21800552	21800553	21800554	21800555	21800556	21800557	21800558	21800559	21800560	21800561	21800562	21800563	21800564	21800565	21800566	21800567	21800568	21800569	21800570	21800571	21800572	21800573	21800574	21800575	21800576
																																								rs574448517
rs354439	GRCh38-Chr13:106285996-106286115 rs354439-A	Ref	TTCTTAACTCTCAAATTGCAGGTTGCGATAGAAAACAGTGAATGATATTCAGAATATTGTGCTTAAAAGGAATGTGATACATGAGAGAGATACATAAGGGAAAGAGAAGCCACCAGAACA	T	T	C	T	T	A	A	C	T	C	T	C	A	A	A	T	T	G	C	A	G	G	T	T	G	C	G	A	T	A	G	A	A	A	A	C	A	G	T	G	A	A	T	G	A	T
rs354439	GRCh38-Chr13:106285996-106286115 rs354439-T	Alt	TTCTTAACTCTCAAATTGCAGGTTGCGATAGAAAACAGTGAATGATATTCAGAATATTGTGCTTAATAGGAATGTGATACATGAGAGAGATACATAAGGGAAAGAGAAGCCACCAGAACA	T	T	C	T	T	A	A	C	T	C	T	C	A	A	A	T	T	G	C	A	G	G	T	T	G	C	G	A	T	A	G	A	A	A	A	C	A	G	T	G	A	A	T	G	A	T
rs354439	GRCh38-Chr13:106285996-106286115 rs574448517-C; rs354439-T	1	TTCTTAACTCTCAAATTGCAGGTTGCGATAGAAAACCGTGAATGATATTCAGAATATTGTGCTTAATAGGAATGTGATACATGAGAGAGATACATAAGGGAAAGAGAAGCCACCAGAACA	T	T	C	T	T	A	A	C	T	C	T	C	A	A	A	T	T	G	C	A	G	G	T	T	G	C	G	A	T	A	G	A	A	A	A	C	C	G	T	G	A	A	T	G	A	T
				106285996	106285997	106285998	106285999	106286000	106286001	106286002	106286003	106286004	106286005	106286006	106286007	106286008	106286009	106286010	106286011	106286012	106286013	106286014	106286015	106286016	106286017	106286018	106286019	106286020	106286021	106286022	106286023	106286024	106286025	106286026	106286027	106286028	106286029	106286030	106286031	106286032	106286033	106286034	106286035	106286036	106286037	106286038	106286039	106286040	106286041
															rs1034706816											ss5982134731
rs1454361	GRCh38-Chr14:25381580-25381654 rs1454361-T	Ref	GTCCATCATCAGTAAGACACTTTTCAGTATCCATTTAGAAACAACATGCAGCTCAGGGTGTATTTCCCTCCTCCC	G	T	C	C	A	T	C	A	T	C	A	G	T	A	A	G	A	C	A	C	T	T	T	T	C	A	G	T	A	T	C	C	A	T	T	T	A	G	A	A	A	C	A	A	C	A
rs1454361	GRCh38-Chr14:25381580-25381654 rs1454361-A	Alt	GTCCATCATCAGTAAGACACTTTTCAGTATCCATTTAGAAACAACAAGCAGCTCAGGGTGTATTTCCCTCCTCCC	G	T	C	C	A	T	C	A	T	C	A	G	T	A	A	G	A	C	A	C	T	T	T	T	C	A	G	T	A	T	C	C	A	T	T	T	A	G	A	A	A	C	A	A	C	A
rs1454361	GRCh38-Chr14:25381580-25381654 rs1034706816-A; rs1454361-T	1	GTCCATCATCAATAAGACACTTTTCAGTATCCATTTAGAAACAACATGCAGCTCAGGGTGTATTTCCCTCCTCCC	G	T	C	C	A	T	C	A	T	C	A	A	T	A	A	G	A	C	A	C	T	T	T	T	C	A	G	T	A	T	C	C	A	T	T	T	A	G	A	A	A	C	A	A	C	A
rs1454361	GRCh38-Chr14:25381580-25381654 ss5982134731-C; rs1454361-T	1	GTCCATCATCAGTAAGACACTTCTCAGTATCCATTTAGAAACAACATGCAGCTCAGGGTGTATTTCCCTCCTCCC	G	T	C	C	A	T	C	A	T	C	A	G	T	A	A	G	A	C	A	C	T	T	C	T	C	A	G	T	A	T	C	C	A	T	T	T	A	G	A	A	A	C	A	A	C	A
				25381580	25381581	25381582	25381583	25381584	25381585	25381586	25381587	25381588	25381589	25381590	25381591	25381592	25381593	25381594	25381595	25381596	25381597	25381598	25381599	25381600	25381601	25381602	25381603	25381604	25381605	25381606	25381607	25381608	25381609	25381610	25381611	25381612	25381613	25381614	25381615	25381616	25381617	25381618	25381619	25381620	25381621	25381622	25381623	25381624	25381625
																				rs1528460																		rs1000513973
rs1528460	GRCh38-Chr15:54918491-54918555 rs1528460-C	Ref	CTTAACATATTTAAGACTGAAAAATGTTACAGTAAAAGTTTTGTTTAATCCTGCATTTGCCAAAC	C	T	T	A	A	C	A	T	A	T	T	T	A	A	G	A	C	T	G	A	A	A	A	A	T	G	T	T	A	C	A	G	T	A	A	A	A	G	T	T	T	T	G	T	T	T
rs1528460	GRCh38-Chr15:54918491-54918555 rs1528460-T	Alt	CTTAACATATTTAAGATTGAAAAATGTTACAGTAAAAGTTTTGTTTAATCCTGCATTTGCCAAAC	C	T	T	A	A	C	A	T	A	T	T	T	A	A	G	A	T	T	G	A	A	A	A	A	T	G	T	T	A	C	A	G	T	A	A	A	A	G	T	T	T	T	G	T	T	T
rs1528460	GRCh38-Chr15:54918491-54918555 rs1528460-T; rs1000513973-C	1	CTTAACATATTTAAGATTGAAAAATGTTACAGTACAAGTTTTGTTTAATCCTGCATTTGCCAAAC	C	T	T	A	A	C	A	T	A	T	T	T	A	A	G	A	T	T	G	A	A	A	A	A	T	G	T	T	A	C	A	G	T	A	C	A	A	G	T	T	T	T	G	T	T	T
rs1528460	GRCh38-Chr15:54918491-54918555 rs1528460-T; rs1281510754-T	1	CTTAACATATTTAAGATTGAAAAATGTTACAGTAAAAGTTTTGTTTAATCCTTCATTTGCCAAAC	C	T	T	A	A	C	A	T	A	T	T	T	A	A	G	A	T	T	G	A	A	A	A	A	T	G	T	T	A	C	A	G	T	A	A	A	A	G	T	T	T	T	G	T	T	T
				54918491	54918492	54918493	54918494	54918495	54918496	54918497	54918498	54918499	54918500	54918501	54918502	54918503	54918504	54918505	54918506	54918507	54918508	54918509	54918510	54918511	54918512	54918513	54918514	54918515	54918516	54918517	54918518	54918519	54918520	54918521	54918522	54918523	54918524	54918525	54918526	54918527	54918528	54918529	54918530	54918531	54918532	54918533	54918534	54918535	54918536
																			rs729172																						rs1395231170	del AT
rs729172	GRCh38-Chr16:5556181-5556221 rs729172-G	Ref	CGGTTACATACATTCGGTCTGCAGAGGAGCCTTGGTCATAT	C	G	G	T	T	A	C	A	T	A	C	A	T	T	C	G	G	T	C	T	G	C	A	G	A	G	G	A	G	C	C	T	T	G	G	T	C	A	T	A	T
rs729172	GRCh38-Chr16:5556181-5556221 rs729172-T	Alt	CGGTTACATACATTCTGTCTGCAGAGGAGCCTTGGTCATAT	C	G	G	T	T	A	C	A	T	A	C	A	T	T	C	T	G	T	C	T	G	C	A	G	A	G	G	A	G	C	C	T	T	G	G	T	C	A	T	A	T
rs729172	GRCh38-Chr16:5556181-5556221 rs729172-G; rs1395231170-DEL_AT	1	CGGTTACATACATTCGGTCTGCAGAGGAGCCTTGGTCAT	C	G	G	T	T	A	C	A	T	A	C	A	T	T	C	G	G	T	C	T	G	C	A	G	A	G	G	A	G	C	C	T	T	G	G	T	C	-	-	A	T
				5556181	5556182	5556183	5556184	5556185	5556186	5556187	5556188	5556189	5556190	5556191	5556192	5556193	5556194	5556195	5556196	5556197	5556198	5556199	5556200	5556201	5556202	5556203	5556204	5556205	5556206	5556207	5556208	5556209	5556210	5556211	5556212	5556213	5556214	5556215	5556216	5556217	5556218	5556219	5556220	5556221
																rs2018414585																		rs409820				rs148208213							rs430044
rs430046	GRCh38-Chr16:77983107-77983174 rs430046-C	Ref	AAGGTCATACAATGAATGGTGTGATGTAAACGCTTGGGAGGCGATTTCTGAGGGTAGGTGCTGGGTTT	A	A	G	G	T	C	A	T	A	C	A	A	T	G	A	A	T	G	G	T	G	T	G	A	T	G	T	A	A	A	C	G	C	T	T	G	G	G	A	G	G	C	G	A	T	T
rs430046	GRCh38-Chr16:77983107-77983174 rs409820-A; rs430044-T; rs430046-T	Alt	AAGGTCATACAATGAATGGTGTGATGTAAAAGCTTGGGAGGTGATTTTTGAGGGTAGGTGCTGGGTTT	A	A	G	G	T	C	A	T	A	C	A	A	T	G	A	A	T	G	G	T	G	T	G	A	T	G	T	A	A	A	A	G	C	T	T	G	G	G	A	G	G	T	G	A	T	T
rs430046	GRCh38-Chr16:77983107-77983174 rs430044-T; rs430046-C	1	AAGGTCATACAATGAATGGTGTGATGTAAACGCTTGGGAGGTGATTTCTGAGGGTAGGTGCTGGGTTT	A	A	G	G	T	C	A	T	A	C	A	A	T	G	A	A	T	G	G	T	G	T	G	A	T	G	T	A	A	A	C	G	C	T	T	G	G	G	A	G	G	T	G	A	T	T
rs430046	GRCh38-Chr16:77983107-77983174 rs409820-A; rs430044-T; rs430046-T; rs190617353-G	4	AAGGTCATACAATGAATGGTGTGATGTAAAAGCTTGGGAGGTGATTTTTGAGGGTAGGTGCTGGGTGT	A	A	G	G	T	C	A	T	A	C	A	A	T	G	A	A	T	G	G	T	G	T	G	A	T	G	T	A	A	A	A	G	C	T	T	G	G	G	A	G	G	T	G	A	T	T
rs430046	GRCh38-Chr16:77983107-77983174 rs148208213-A; rs430046-C	1	AAGGTCATACAATGAATGGTGTGATGTAAACGCTAGGGAGGCGATTTCTGAGGGTAGGTGCTGGGTTT	A	A	G	G	T	C	A	T	A	C	A	A	T	G	A	A	T	G	G	T	G	T	G	A	T	G	T	A	A	A	C	G	C	T	A	G	G	G	A	G	G	C	G	A	T	T
rs430046	GRCh38-Chr16:77983107-77983174 rs430046-C; rs887563102-DEL_A	1	AAGGTCATACAATGAATGGTGTGATGTAAACGCTTGGGAGGCGATTTCTGGGGTAGGTGCTGGGTTT	A	A	G	G	T	C	A	T	A	C	A	A	T	G	A	A	T	G	G	T	G	T	G	A	T	G	T	A	A	A	C	G	C	T	T	G	G	G	A	G	G	C	G	A	T	T
rs430046	GRCh38-Chr16:77983107-77983174 rs2018414585-A rs409820-A; rs430044-T; rs430046-T	1	AAGGTCATACAAAGAATGGTGTGATGTAAAAGCTTGGGAGGTGATTTTTGAGGGTAGGTGCTGGGTTT	A	A	G	G	T	C	A	T	A	C	A	A	A	G	A	A	T	G	G	T	G	T	G	A	T	G	T	A	A	A	A	G	C	T	T	G	G	G	A	G	G	T	G	A	T	T
				77983107	77983108	77983109	77983110	77983111	77983112	77983113	77983114	77983115	77983116	77983117	77983118	77983119	77983120	77983121	77983122	77983123	77983124	77983125	77983126	77983127	77983128	77983129	77983130	77983131	77983132	77983133	77983134	77983135	77983136	77983137	77983138	77983139	77983140	77983141	77983142	77983143	77983144	77983145	77983146	77983147	77983148	77983149	77983150	77983151	77983152
																								rs1382387																					rs531107594
rs1382387	GRCh38-Chr16:80072444-80072489 rs1382387-C	Ref	GCATCTGCCCACTGCAGGGACTTGAAAGTTCAGGTGTTTCTCCTTC	G	C	A	T	C	T	G	C	C	C	A	C	T	G	C	A	G	G	G	A	C	T	T	G	A	A	A	G	T	T	C	A	G	G	T	G	T	T	T	C	T	C	C	T	T	C
rs1382387	GRCh38-Chr16:80072444-80072489 rs1382387-A	Alt	GCATCTGCCCACTGCAGGGAATTGAAAGTTCAGGTGTTTCTCCTTC	G	C	A	T	C	T	G	C	C	C	A	C	T	G	C	A	G	G	G	A	A	T	T	G	A	A	A	G	T	T	C	A	G	G	T	G	T	T	T	C	T	C	C	T	T	C
rs1382387	GRCh38-Chr16:80072444-80072489 rs1382387-A; rs531107594-T	1	GCATCTGCCCACTGCAGGGAATTGAAAGTTCAGGTGTTTCTTCTTC	G	C	A	T	C	T	G	C	C	C	A	C	T	G	C	A	G	G	G	A	A	T	T	G	A	A	A	G	T	T	C	A	G	G	T	G	T	T	T	C	T	T	C	T	T	C
				80072444	80072445	80072446	80072447	80072448	80072449	80072450	80072451	80072452	80072453	80072454	80072455	80072456	80072457	80072458	80072459	80072460	80072461	80072462	80072463	80072464	80072465	80072466	80072467	80072468	80072469	80072470	80072471	80072472	80072473	80072474	80072475	80072476	80072477	80072478	80072479	80072480	80072481	80072482	80072483	80072484	80072485	80072486	80072487	80072488	80072489
																											rs1451296593																				rs740910
rs740910	GRCh38-Chr17:5803260-5803323 rs740910-A	Ref	AAGTATAACAGTTTGCTAAGTAAGGTGAGTGGTATAATCATATATTTGTAAAAAGCAAAACAAA	A	A	G	T	A	T	A	A	C	A	G	T	T	T	G	C	T	A	A	G	T	A	A	G	G	T	G	A	G	T	G	G	T	A	T	A	A	T	C	A	T	A	T	A	T	T
rs740910	GRCh38-Chr17:5803260-5803323 rs740910-G	Alt	AAGTATAACAGTTTGCTAAGTAAGGTGAGTGGTATAATCATATGTTTGTAAAAAGCAAAACAAA	A	A	G	T	A	T	A	A	C	A	G	T	T	T	G	C	T	A	A	G	T	A	A	G	G	T	G	A	G	T	G	G	T	A	T	A	A	T	C	A	T	A	T	G	T	T
rs740910	GRCh38-Chr17:5803260-5803323 rs1451296593-A; rs740910-A	1	AAGTATAACAGTTTGCTAAGTAAAGTGAGTGGTATAATCATATATTTGTAAAAAGCAAAACAAA	A	A	G	T	A	T	A	A	C	A	G	T	T	T	G	C	T	A	A	G	T	A	A	A	G	T	G	A	G	T	G	G	T	A	T	A	A	T	C	A	T	A	T	A	T	T
				5803260	5803261	5803262	5803263	5803264	5803265	5803266	5803267	5803268	5803269	5803270	5803271	5803272	5803273	5803274	5803275	5803276	5803277	5803278	5803279	5803280	5803281	5803282	5803283	5803284	5803285	5803286	5803287	5803288	5803289	5803290	5803291	5803292	5803293	5803294	5803295	5803296	5803297	5803298	5803299	5803300	5803301	5803302	5803303	5803304	5803305
																																													rs968245314	rs938283	rs1031265526
rs938283	GRCh38-Chr17:79472374-79472426 rs938283-T	Ref	CATACATTGAAGTCCTAACCCCTAGTACGTTAGATGTGACCGTATTTGGAGAT	C	A	T	A	C	A	T	T	G	A	A	G	T	C	C	T	A	A	C	C	C	C	T	A	G	T	A	C	G	T	T	A	G	A	T	G	T	G	A	C	C	G	T	A	T	T
rs938283	GRCh38-Chr17:79472374-79472426 rs938283-C	Alt	CATACATTGAAGTCCTAACCCCTAGTACGTTAGATGTGACCGCATTTGGAGAT	C	A	T	A	C	A	T	T	G	A	A	G	T	C	C	T	A	A	C	C	C	C	T	A	G	T	A	C	G	T	T	A	G	A	T	G	T	G	A	C	C	G	C	A	T	T
rs938283	GRCh38-Chr17:79472374-79472426 rs938283-C; rs1031265526-G	1	CATACATTGAAGTCCTAACCCCTAGTACGTTAGATGTGACCGCGTTTGGAGAT	C	A	T	A	C	A	T	T	G	A	A	G	T	C	C	T	A	A	C	C	C	C	T	A	G	T	A	C	G	T	T	A	G	A	T	G	T	G	A	C	C	G	C	G	T	T
rs938283	GRCh38-Chr17:79472374-79472426 rs968245314-A; rs938283-T	1	CATACATTGAAGTCCTAACCCCTAGTACGTTAGATGTGACCATATTTGGAGAT	C	A	T	A	C	A	T	T	G	A	A	G	T	C	C	T	A	A	C	C	C	C	T	A	G	T	A	C	G	T	T	A	G	A	T	G	T	G	A	C	C	A	T	A	T	T
				79472374	79472374	79472374	79472374	79472374	79472374	79472374	79472374	79472374	79472374	79472374	79472374	79472374	79472374	79472374	79472374	79472374	79472374	79472374	79472374	79472374	79472374	79472374	79472374	79472374	79472374	79472374	79472374	79472374	79472374	79472374	79472374	79472374	79472374	79472374	79472374	79472374	79472374	79472374	79472374	79472374	79472374	79472374	79472374	79472374	79472374
							rs78650971																										rs1013437705																rs559299986
rs8078417	GRCh38-Chr17:82503992-82504093 rs8078417-C	Ref	GGGGACGCCTGGCGCTGCGAGGGAGGCCCCGAGCCTCGTGCCCCCGTGAAGCTTCAGCTCCCCTCCCCGGCTGTCCTTGAGGCTCTTCTCACACTCAGATGC	G	G	G	G	A	C	G	C	C	T	G	G	C	G	C	T	G	C	G	A	G	G	G	A	G	G	C	C	C	C	G	A	G	C	C	T	C	G	T	G	C	C	C	C	C	G
rs8078417	GRCh38-Chr17:82503992-82504093 rs8078417-T	Alt	GGGGACGCCTGGCGCTGCGAGGGAGGCCCCGAGCCTCGTGCCCCCGTGAAGCTTCAGCTCCCCTCCCTGGCTGTCCTTGAGGCTCTTCTCACACTCAGATGC	G	G	G	G	A	C	G	C	C	T	G	G	C	G	C	T	G	C	G	A	G	G	G	A	G	G	C	C	C	C	G	A	G	C	C	T	C	G	T	G	C	C	C	C	C	G
rs8078417	GRCh38-Chr17:82503992-82504093 rs78650971-C; rs559299986-A; rs8078417-C	1	GGGCACGCCTGGCGCTGCGAGGGAGGCCCCGAGCCTCGTGCCCCCATGAAGCTTCAGCTCCCCTCCCCGGCTGTCCTTGAGGCTCTTCTCACACTCAGATGC	G	G	G	C	A	C	G	C	C	T	G	G	C	G	C	T	G	C	G	A	G	G	G	A	G	G	C	C	C	C	G	A	G	C	C	T	C	G	T	G	C	C	C	C	C	A
rs8078417	GRCh38-Chr17:82503992-82504093 rs8078417-C; rs1003845167-A	1	GGGGACGCCTGGCGCTGCGAGGGAGGCCCCGAGCCTCGTGCCCCCGTGAAGCTTCAGCTCCCCTCCCCAGCTGTCCTTGAGGCTCTTCTCACACTCAGATGC	G	G	G	G	A	C	G	C	C	T	G	G	C	G	C	T	G	C	G	A	G	G	G	A	G	G	C	C	C	C	G	A	G	C	C	T	C	G	T	G	C	C	C	C	C	G
rs8078417	GRCh38-Chr17:82503992-82504093 rs8078417-C; rs1251308240-DEL_G	1	GGGGACGCCTGGCGCTGCGAGGGAGGCCCCGAGCCTCGTGCCCCCGTGAAGCTTCAGCTCCCCTCCCCGCTGTCCTTGAGGCTCTTCTCACACTCAGATGC	G	G	G	G	A	C	G	C	C	T	G	G	C	G	C	T	G	C	G	A	G	G	G	A	G	G	C	C	C	C	G	A	G	C	C	T	C	G	T	G	C	C	C	C	C	G
rs8078417	GRCh38-Chr17:82503992-82504093 rs1013437705-T rs8078417-T	1	GGGGACGCCTGGCGCTGCGAGGGAGGCCCTGAGCCTCGTGCCCCCGTGAAGCTTCAGCTCCCCTCCCTGGCTGTCCTTGAGGCTCTTCTCACACTCAGATGC	G	G	G	G	A	C	G	C	C	T	G	G	C	G	C	T	G	C	G	A	G	G	G	A	G	G	C	C	C	T	G	A	G	C	C	T	C	G	T	G	C	C	C	C	C	G
				82503992	82503993	82503994	82503995	82503996	82503997	82503998	82503999	82504000	82504001	82504002	82504003	82504004	82504005	82504006	82504007	82504008	82504009	82504010	82504011	82504012	82504013	82504014	82504015	82504016	82504017	82504018	82504019	82504020	82504021	82504022	82504023	82504024	82504025	82504026	82504027	82504028	82504029	82504030	82504031	82504032	82504033	82504034	82504035	82504036	82504037
															rs1906582359					rs1493232
rs1493232	GRCh38-Chr18:1127969-1127996 rs1493232-C	Ref	TTTTGGGTGCTAGGCCCCAAAATAAACA	T	T	T	T	G	G	G	T	G	C	T	A	G	G	C	C	C	C	A	A	A	A	T	A	A	A	C	A
rs1493232	GRCh38-Chr18:1127969-1127996 rs1493232-A	Alt	TTTTGGGTGCTAGGCCACAAAATAAACA	T	T	T	T	G	G	G	T	G	C	T	A	G	G	C	C	A	C	A	A	A	A	T	A	A	A	C	A
rs1493232	GRCh38-Chr18:1127969-1127996 rs1906582359-G; rs1493232-A	1	TTTTGGGTGCTGGGCCACAAAATAAACA	T	T	T	T	G	G	G	T	G	C	T	G	G	G	C	C	A	C	A	A	A	A	T	A	A	A	C	A
				1127969	1127970	1127971	1127972	1127973	1127974	1127975	1127976	1127977	1127978	1127979	1127980	1127981	1127982	1127983	1127984	1127985	1127986	1127987	1127988	1127989	1127990	1127991	1127992	1127993	1127994	1127995	1127996
																																	ss5982134732
rs9951171	GRCh38-Chr18:9749816-9749890 rs9951171-G	Ref	GGGAGAAAAGTCCTCGTTGTTCCTCTGGGATGCAACATGAGAGAGCAGCACACTGAGGCTTTATGGGTTGCCCTG	G	G	G	A	G	A	A	A	A	G	T	C	C	T	C	G	T	T	G	T	T	C	C	T	C	T	G	G	G	A	T	G	C	A	A	C	A	T	G	A	G	A	G	A	G	C
rs9951171	GRCh38-Chr18:9749816-9749890 rs9951171-A	Alt	GGGAGAAAAGTCCTCGTTGTTCCTCTGGGATGCAACATGAGAGAGCAGCACACTGAGGCTTTATGGATTGCCCTG	G	G	G	A	G	A	A	A	A	G	T	C	C	T	C	G	T	T	G	T	T	C	C	T	C	T	G	G	G	A	T	G	C	A	A	C	A	T	G	A	G	A	G	A	G	C
rs9951171	GRCh38-Chr18:9749816-9749890 ss5982134732-T; rs9951171-A	1	GGGAGAAAAGTCCTCGTTGTTCCTCTGGGTTGCAACATGAGAGAGCAGCACACTGAGGCTTTATGGATTGCCCTG	G	G	G	A	G	A	A	A	A	G	T	C	C	T	C	G	T	T	G	T	T	C	C	T	C	T	G	G	G	T	T	G	C	A	A	C	A	T	G	A	G	A	G	A	G	C
				9749816	9749817	9749818	9749819	9749820	9749821	9749822	9749823	9749824	9749825	9749826	9749827	9749828	9749829	9749830	9749831	9749832	9749833	9749834	9749835	9749836	9749837	9749838	9749839	9749840	9749841	9749842	9749843	9749844	9749845	9749846	9749847	9749848	9749849	9749850	9749851	9749852	9749853	9749854	9749855	9749856	9749857	9749858	9749859	9749860	9749861
rs1736442	GRCh38-Chr18:57558486-57558588 rs1736442-T	Ref	CGCTTGTCTGAATGGAGACCCCCCCACTCAACACACAGAAACATCAAGCTGAGCTCTGCTGACAGGGCAGGCAAAAGCAGCCTTCTCTTAACTGTCCCACTTA	C	G	C	T	T	G	T	C	T	G	A	A	T	G	G	A	G	A	C	C	C	C	C	C	C	A	C	T	C	A	A	C	A	C	A	C	A	G	A	A	A	C	A	T	C	A
rs1736442	GRCh38-Chr18:57558486-57558588 rs1736442-C	Alt	CGCTTGTCTGAATGGAGACCCCCCCACTCAACACACAGAAACATCAAGCTGAGCTCTGCCGACAGGGCAGGCAAAAGCAGCCTTCTCTTAACTGTCCCACTTA	C	G	C	T	T	G	T	C	T	G	A	A	T	G	G	A	G	A	C	C	C	C	C	C	C	A	C	T	C	A	A	C	A	C	A	C	A	G	A	A	A	C	A	T	C	A
rs1736442	GRCh38-Chr18:57558486-57558588 rs1736442-C; rs529597152-A	2	CGCTTGTCTGAATGGAGACCCCCCCACTCAACACACAGAAACATCAAGCTGAGCTCTGCCAACAGGGCAGGCAAAAGCAGCCTTCTCTTAACTGTCCCACTTA	C	G	C	T	T	G	T	C	T	G	A	A	T	G	G	A	G	A	C	C	C	C	C	C	C	A	C	T	C	A	A	C	A	C	A	C	A	G	A	A	A	C	A	T	C	A
				57558486	57558487	57558488	57558489	57558490	57558491	57558492	57558493	57558494	57558495	57558496	57558497	57558498	57558499	57558500	57558501	57558502	57558503	57558504	57558505	57558506	57558507	57558508	57558509	57558510	57558511	57558512	57558513	57558514	57558515	57558516	57558517	57558518	57558519	57558520	57558521	57558522	57558523	57558524	57558525	57558526	57558527	57558528	57558529	57558530	57558531
																																		rs1204187713													rs1031825
rs1031825	GRCh38-Chr20:4466793-4466869 rs1031825-A	Ref	GTCCTTAACCTATTAAATTTTAATGAGTATTTTATTTATCTAAACCCCGAGCATACTTGAAAGCAGTGATTATATCT	G	T	C	C	T	T	A	A	C	C	T	A	T	T	A	A	A	T	T	T	T	A	A	T	G	A	G	T	A	T	T	T	T	A	T	T	T	A	T	C	T	A	A	A	C	C
rs1031825	GRCh38-Chr20:4466793-4466869 rs1031825-C	Alt	GTCCTTAACCTATTAAATTTTAATGAGTATTTTATTTATCTAACCCCCGAGCATACTTGAAAGCAGTGATTATATCT	G	T	C	C	T	T	A	A	C	C	T	A	T	T	A	A	A	T	T	T	T	A	A	T	G	A	G	T	A	T	T	T	T	A	T	T	T	A	T	C	T	A	A	C	C	C
rs1031825	GRCh38-Chr20:4466793-4466869 rs1031825-A; rs1052803192-A	1	GTCCTTAACCTATTAAATTTTAATGAGTATTTTATTTATCTAAACCCCGAGCATACATGAAAGCAGTGATTATATCT	G	T	C	C	T	T	A	A	C	C	T	A	T	T	A	A	A	T	T	T	T	A	A	T	G	A	G	T	A	T	T	T	T	A	T	T	T	A	T	C	T	A	A	A	C	C
rs1031825	GRCh38-Chr20:4466793-4466869 rs1204187713-DEL_TTTA; rs1031825-C	1	GTCCTTAACCTATTAAATTTTAATGAGTATTTTATCTAACCCCCGAGCATACTTGAAAGCAGTGATTATATCT	G	T	C	C	T	T	A	A	C	C	T	A	T	T	A	A	A	T	T	T	T	A	A	T	G	A	G	T	A	T	-	-	-	-	T	T	T	A	T	C	T	A	A	C	C	C
				4466793	4466794	4466795	4466796	4466797	4466798	4466799	4466800	4466801	4466802	4466803	4466804	4466805	4466806	4466807	4466808	4466809	4466810	4466811	4466812	4466813	4466814	4466815	4466816	4466817	4466818	4466819	4466820	4466821	4466822	4466823	4466824	4466825	4466826	4466827	4466828	4466829	4466830	4466831	4466832	4466833	4466834	4466835	4466836	4466837	4466838
																																	rs562236636
rs2830795	GRCh38-Chr21:27235795-27235862 rs2830795-A	Ref	ACTGGGTTCACTTCTATAGACATAGGACACACCATTTTATTGTCTAAAGAGCAAAGAAGTCCTATTAT	A	C	T	G	G	G	T	T	C	A	C	T	T	C	T	A	T	A	G	A	C	A	T	A	G	G	A	C	A	C	A	C	C	A	T	T	T	T	A	T	T	G	T	C	T	A
rs2830795	GRCh38-Chr21:27235795-27235862 rs2830795-G	Alt	ACTGGGTTCACTTCTATAGACATAGGACACACCATTTTATTGTCTAAAGGGCAAAGAAGTCCTATTAT	A	C	T	G	G	G	T	T	C	A	C	T	T	C	T	A	T	A	G	A	C	A	T	A	G	G	A	C	A	C	A	C	C	A	T	T	T	T	A	T	T	G	T	C	T	A
rs2830795	GRCh38-Chr21:27235795-27235862 rs562236636-T; rs2830795-G	1	ACTGGGTTCACTTCTATAGACATAGGACATACCATTTTATTGTCTAAAGGGCAAAGAAGTCCTATTAT	A	C	T	G	G	G	T	T	C	A	C	T	T	C	T	A	T	A	G	A	C	A	T	A	G	G	A	C	A	T	A	C	C	A	T	T	T	T	A	T	T	G	T	C	T	A
				27235795	27235796	27235797	27235798	27235799	27235800	27235801	27235802	27235803	27235804	27235805	27235806	27235807	27235808	27235809	27235810	27235811	27235812	27235813	27235814	27235815	27235816	27235817	27235818	27235819	27235820	27235821	27235822	27235823	27235824	27235825	27235826	27235827	27235828	27235829	27235830	27235831	27235832	27235833	27235834	27235835	27235836	27235837	27235838	27235839	27235840
																													rs2831700		rs1986784701
rs2831700	GRCh38-Chr21:28307343-28307376 rs2831700-A	Ref	ATTTGGCTAAACTATTGCCGGAGATAAGTTAGAA	A	T	T	T	G	G	C	T	A	A	A	C	T	A	T	T	G	C	C	G	G	A	G	A	T	A	A	G	T	T	A	G	A	A
rs2831700	GRCh38-Chr21:28307343-28307376 rs2831700-G	Alt	ATTTGGCTAAACTATTGCCGGAGATGAGTTAGAA	A	T	T	T	G	G	C	T	A	A	A	C	T	A	T	T	G	C	C	G	G	A	G	A	T	G	A	G	T	T	A	G	A	A
rs2831700	GRCh38-Chr21:28307343-28307376 rs2831700-G; rs1986784701-A	1	ATTTGGCTAAACTATTGCCGGAGATGAATTAGAA	A	T	T	T	G	G	C	T	A	A	A	C	T	A	T	T	G	C	C	G	G	A	G	A	T	G	A	A	T	T	A	G	A	A
				28307343	28307344	28307345	28307346	28307347	28307348	28307349	28307350	28307351	28307352	28307353	28307354	28307355	28307356	28307357	28307358	28307359	28307360	28307361	28307362	28307363	28307364	28307365	28307366	28307367	28307368	28307369	28307370	28307371	28307372	28307373	28307374	28307375	28307376
																		rs1926179279
rs733164	GRCh38-Chr22:27420770-27420849 rs733164-G	Ref	CCAGGCTCAGCTTTCAGCCCCAGGTCCCACCAACAGGCCATCCCACTTGGAAAGTTTGCCTGACATTCCTGAGCCGGGCC	C	C	A	G	G	C	T	C	A	G	C	T	T	T	C	A	G	C	C	C	C	A	G	G	T	C	C	C	A	C	C	A	A	C	A	G	G	C	C	A	T	C	C	C	A	C
rs733164	GRCh38-Chr22:27420770-27420849 rs733164-A	Alt	CCAGGCTCAGCTTTCAGCCCCAGGTCCCACCAACAGGCCATCCCACTTGGAAAATTTGCCTGACATTCCTGAGCCGGGCC	C	C	A	G	G	C	T	C	A	G	C	T	T	T	C	A	G	C	C	C	C	A	G	G	T	C	C	C	A	C	C	A	A	C	A	G	G	C	C	A	T	C	C	C	A	C
rs733164	GRCh38-Chr22:27420770-27420849 rs733164-G; rs770724398-T	1	CCAGGCTCAGCTTTCAGCCCCAGGTCCCACCAACAGGCCATCCCACTTGGAAAGTTTGCCTGACATTCCTGAGCCGGGCT	C	C	A	G	G	C	T	C	A	G	C	T	T	T	C	A	G	C	C	C	C	A	G	G	T	C	C	C	A	C	C	A	A	C	A	G	G	C	C	A	T	C	C	C	A	C
rs733164	GRCh38-Chr22:27420770-27420849 rs1926179279-T rs733164-G	1	CCAGGCTCAGCTTTTAGCCCCAGGTCCCACCAACAGGCCATCCCACTTGGAAAGTTTGCCTGACATTCCTGAGCCGGGCC	C	C	A	G	G	C	T	C	A	G	C	T	T	T	T	A	G	C	C	C	C	A	G	G	T	C	C	C	A	C	C	A	A	C	A	G	G	C	C	A	T	C	C	C	A	C
				27420770	27420771	27420772	27420773	27420774	27420775	27420776	27420777	27420778	27420779	27420780	27420781	27420782	27420783	27420784	27420785	27420786	27420787	27420788	27420789	27420790	27420791	27420792	27420793	27420794	27420795	27420796	27420797	27420798	27420799	27420800	27420801	27420802	27420803	27420804	27420805	27420806	27420807	27420808	27420809	27420810	27420811	27420812	27420813	27420814	27420815
[truncated: 82 more columns]
